# Supplementary material
Source: bioRxiv or medRxiv preprint supplement (https://medrxiv.org/highwire/filestream/68612/field_highwire_adjunct_files/0/19003822-1.pdf)
Supplement: Supplementary file [file 19003822-1.pdf]

**Table of contents:**

Supplementary text files ..... 3

    S1 Text. Supplementary methods: Exposure assessment and calculation of trend ..... 3

    S2 Text. Supplementary methods: Data collection of covariates ..... 3

Supplementary Tables ..... 11

    S1 Table. Baseline distribution of meat intake of included UK Biobank participants..... 11

    S2 Table. Baseline characteristics by red and processed meat intake ..... 12

    S3 Table. Baseline characteristics by poultry intake ..... 15

    S4 Table. Hazard ratios and 95% confidence intervals of cancer incidence by site according to total meat intake in UK Biobank..... 18

    S5 Table. Hazard ratios and 95% confidence intervals of cancer incidence by site according to red and processed meat intake in UK Biobank ..... 21

    S6 Table. Hazard ratios and 95% confidence intervals of cancer incidence by site according to red meat intake in UK Biobank..... 24

    S7 Table. Hazard ratios and 95% confidence intervals of cancer incidence by site according to processed meat intake in UK Biobank ..... 27

    S8 Table. Hazard ratios and 95% confidence intervals of cancer incidence by site according to poultry intake in UK Biobank ..... 30

    S9 Table. Multivariable adjusted hazard ratios and 95% confidence intervals of colorectal, colon and rectal cancer incidence by meat type and sex in UK Biobank\* ..... 33

Supplementary figures ..... 35

    S1 Fig. Associations of total meat intake and cancer incidence by cancer site (per 100g/day) when excluding first 2 years of follow-up (A, n = 459,363) and including only never smokers (B, n = 256,009)\* ..... 35

    S2 Fig. Associations of red and processed meat intake and cancer incidence by cancer site (per 70g/day) when excluding first 2 years of follow-up (A, n = 459,713) and including only never smokers (B, n = 256,182)\* ..... 37

    S3 Fig. Associations of red meat intake and cancer incidence by cancer site (per 50g/day) when excluding first 2 years of follow-up (A, n = 460,288) and including only never smokers (B, n = 256,545)\* ..... 39

    S4 Fig. Associations of processed meat intake and cancer incidence by cancer site (per 20g/day) when excluding first 2 years of follow-up (A, n = 464,736) and including only never smokers (B, n = 258,827)\* ..... 41

S5 Fig. Associations of poultry intake and cancer incidence by cancer site (per 30g/day) when excluding first 2 years of follow-up (A, n = 464,897) and including only never smokers (B, n = 259,040)\* ..... 43

## **Supplementary text files**

### **S1 Text. Supplementary methods: Exposure assessment and calculation of trend**

Information on meat intake was derived from five questions included in the touchscreen questionnaire: 'How often do you eat processed meats (such as bacon, ham, sausages, meat pies, kebabs, burgers, chicken nuggets)', 'How often do you eat chicken, turkey or other poultry? (Do not count processed meats)', 'How often do you eat beef? (Do not count processed meats)', 'How often do you eat lamb/mutton? (Do not count processed meats)' and 'How often do you eat pork? (Do not count processed meats such as bacon or ham)'. As described in the main manuscript, these were used to differentiate intakes of red, processed meat and poultry, and additionally combined to intakes of red and processed meat and total meat. Intakes were categorised into three to four groups depending on the distribution of the data.

To calculate a trend in risk the data from the touchscreen questionnaire was combined with data from a second diet questionnaire, the Oxford WebQ. In 2009 this additional questionnaire on dietary intake the day before was added to the data collection [1]. The Oxford WebQ is a self-administered web-based 24 hour recall questionnaire of frequency from a set food list (206 items) [2]. Participants recruited after introduction of the Oxford WebQ completed this questionnaire at the baseline assessment centre (n = 70,716). All participants who had agreed to being re-contacted by UK Biobank and had provided email addresses (approximately 320,000 participants) were invited to complete the Oxford WebQ online at home on 4 occasions during the follow-up period, February – April 2011, June – August 2011, October – December 2011 and April to June 2012 [3]. To obtain mean meat intake in each touchscreen intake group we selected a subsample of 69,076 participants, who had completed a minimum of three WebQ questionnaires to account for daily variation in diet, who did not suffer from any cancer (excluding non-melanoma skin cancer ICD-10 C44) when completing any of these questionnaires, and who had at no time reported energy intakes outside of 2,093 to 14,654 kJ for women, 3,349 to 16,747 kJ for men and unusual eating or drinking due to illness or fasting [4]. Meat items were chosen to closely match the touchscreen [5]. First, mean meat intake was averaged across WebQ questionnaires for each participant in the subsample. Second, the average meat intake of each touchscreen category was assigned to the participants of the subsample with re-measured 24-h dietary recall based on the WebQ [6]. This method was used to calculate a trend in risk per increment and reduce measurement error including regression dilution [7].

Trends in risk are expressed in increments of 50 g/day for red meat intake, 20 g/day for processed meat intake, 30 g/day for poultry intake, 70 g/day for red and processed meat intake and 100 g/day for total meat intake. Increments were chosen based on the approximate difference between mean intakes based on responses to the WebQ in the highest and the lowest categories for each meat-type in our cohort.

### **S2 Text. Supplementary methods: Data collection of covariates**

Covariates were chosen based on the literature and availability of data at baseline.

### Age:

Age at recruitment was recorded at the reception when attending the baseline assessment centre. We then categorised age into 6 groups: <45, 45-<50, 50-<55, 55-<60, 60-<65 and ≥65 years.

### Region:

Region refers to the respective baseline assessment centres which were based in Barts, Hounslow, Croydon, Swansea, Wrexham, Cardiff, Stockport, Manchester, Liverpool, Bury, Newcastle upon Tyne, Middlesbrough, Leeds, Sheffield, Stoke, Birmingham, Nottingham, Oxford, Reading, Bristol, Glasgow, and Edinburgh. These regions were grouped as follows: London (Barts, Hounslow and Croydon), Wales (Wrexham, Swansea and Cardiff), North-West (Stockport, Manchester, Liverpool and Bury), North-East (Newcastle and Middlesbrough), Yorkshire and Humber (Leeds and Sheffield), West Midlands (Stoke and Birmingham), East Midlands (Nottingham), South-East (Oxford, Reading), South-West (Bristol) and Scotland (Glasgow and Edinburgh).

### Ethnicity:

Ethnicity was assessed using one overall question on ethnicity 'What is your ethnic group?' allowing for 'White', 'Mixed', 'Asian or Asian British', 'Black or Black British', 'Chinese', 'Other ethnic group', 'Do not know' or 'Prefer not to answer' and four supporting questions within groups. Ethnicity was categorised into 4 groups: 'White' was defined as either answering white, British, Irish or any other white background; 'Asian or Asian British' was defined as Asian or Asian British, Chinese, Indian, Pakistani, Bangladeshi or any other Asian background; 'Black or Black British' was defined as Black or Black British, Caribbean, African or any other Black background; 'Mixed Race or other' was defined as reporting either any other ethnic groups or mixed ethnicity; participants with missing data, reporting they did not know or preferred not to answer were grouped as 'unknown' (0.6%). An alternative variable with three categories ('White', 'Non-White' and 'unknown'), was used in analyses of cancer sites where there were no or too few cases in each ethnic group other than white (oral, oesophagus, stomach and melanoma skin cancer).

### Townsend deprivation score:

Material deprivation was measured with the Townsend index. Participants were assigned a score based on their postcode at assessment. The Townsend index is derived from four variables: percentage unemployment, percentage overcrowded households, percentage of people with no car ownership and percentage of non-home owners [8]. Negative values indicate areas with relative affluence with low material deprivation, positive indicate areas with high material deprivation [9]. For analyses the index was categorised into quintiles (Q1: mean -4.69, Q2: mean -3.34, Q3: mean -2.09, Q4: mean -0.09, Q5: mean 3.78). Participants without Townsend index information were categorised as 'unknown' (0.1%).

### Qualification:

Highest qualification was assessed within the touchscreen questionnaire 'Which of the following qualifications do you have?' with the options 'College or University degree', 'A levels/AS levels or equivalent', 'O levels/GCSEs or equivalent', 'CSEs or equivalent', 'NVQ or HND or HNC or

equivalent', 'Other professional qualifications e.g.: nursing, teaching', 'None of the above' and 'Prefer not to answer'. Qualification was then categorised into three groups: the highest qualifications included 'College or University degree', 'NVQ or HND or HNC or equivalent', 'Other professional qualifications e.g.: nursing, teaching' and are referred to as College or university degree/vocational qualification; the intermediate qualifications included 'A levels/AS levels or equivalent' and are referred to as national examination at age 17-18; and the lowest level of qualifications included 'O levels/GCSEs or equivalent', 'CSEs or equivalent' and are referred to as national examination at age 16. Participants who had answered 'None of the above' or 'prefer not to answer' or who had not answered the question were categorised as 'other/unknown' (18.7%).

#### Employment:

Current employment status was assessed within the touchscreen questionnaire with the question 'Which of the following describes your current situation?' allowing for multiple answers: 'In paid employment or self-employed', 'Retired', 'Looking after home and/or family', 'Unable to work because of sickness or disability', 'Unemployed', 'Doing unpaid or voluntary work', 'Full or part time student', 'None of the above' and 'Prefer not to answer'. Participants who reported being in paid employment or self-employed were grouped into 'in paid employment', retired participants were grouped into 'pension', those reporting no paid employment (only reporting caring responsibilities, being a student, unemployed or inability to work) were grouped into 'not in paid employment' and participants who did not answer, preferred not to answer or deemed no answer to fit were grouped into an 'unknown' category (1.2%).

#### Living with a spouse or partner:

Living with a partner was defined as having answered the question 'How are the other people who live with you related to you?' with 'Husband, wife or partner' within the touchscreen questionnaire. Participants with no information on this or who preferred not to answer were categorised as unknown (0.4%).

#### Height:

Height was measured at baseline assessment with a Seca 240 cm height measure using a standardised protocol and categorised into sex-specific quintiles (Women: Q1: mean 154 cm, Q2: mean 160 cm, Q3: mean 163 cm, Q4: mean 166 cm, Q5: mean 172 cm; Men: Q1: mean 167 cm, Q2: mean 173 cm, Q3: mean 176 cm, Q4: mean 179 cm, Q5: mean 185 cm). Where height measurements were missing participants were categorised into an 'unknown' group (0.5%).

#### Body mass index (BMI):

Weight was measured at baseline assessment using a Tanita BC418MA body composition analyser as part of Bioimpedance measurement. For participants that did not participate in Bioimpedance analysis body weight was based on measurement using a standard scale. Body mass index (BMI) was calculated as weight in kilograms divided by height in metres squared and categorised into sex-specific quintiles (Women: Q1: mean 21 kg/m<sup>2</sup>, Q2: mean 24 kg/m<sup>2</sup>, Q3: mean 26 kg/m<sup>2</sup>, Q4: mean 29 kg/m<sup>2</sup>, Q5: mean 35 kg/m<sup>2</sup>; Men: Q1: mean 23 kg/m<sup>2</sup>, Q2: mean 26 kg/m<sup>2</sup>, Q3: mean 27 kg/m<sup>2</sup>,

Q4: mean 29 kg/m<sup>2</sup>, Q5: mean 34 kg/m<sup>2</sup>). Where height and/or weight measurements were missing participants were categorised into an 'unknown' group (0.6%).

#### Smoking:

Current smoking status was derived from the touchscreen questionnaires at baseline 'Do you smoke tobacco now?' with the options 'Yes, on most or all days', 'Only occasionally', 'No' and 'Prefer not to answer' and 'In the past, how often have you smoked tobacco?' with the options 'Smoked on most or all days', 'Smoked occasionally', 'Just tried once or twice', 'I have never smoked', 'Prefer not to answer'. Number of cigarettes smoked per day was obtained from the question 'About how many cigarettes do you smoke on average each day?' apart from choosing a number, participants could answer, 'less than one', 'do not know' and 'prefer not to answer'. Using these two questions, smoking status was categorised into 5 groups 'never smoker', 'former smoker', 'current smoker <15 cigarettes/day', 'current smoker ≥15 cigarettes/day' and 'current smoker, amount unknown' and 'unknown' smoking status (0.6%).

#### Physical activity:

Physical activity was assessed using a list of questions within the baseline touchscreen questionnaire that were adapted from the short form International Physical activity questionnaire (IPAQ). The questionnaire was validated in adults across 12 countries [10]. The questionnaire assesses frequency, duration and of three types of activity walking, moderate and vigorous activity. In UK Biobank the question on duration was only asked if participants answered the question on frequency with a number other than zero. Physical activity data was cleaned according to the IPAQ protocol [11]. Excess metabolic equivalents (METs) were calculated by multiplying the sum of walking time per week with 2.3, moderate activity time per week with 3.0 and vigorous activity per week with 7.0 excess METs. Where a type of activity was missing but others were available this type was treated as zero METs of this activity. Excess METs include only additional activity above basal resting metabolic rates [12, 13]. Physical activity was then categorised into 3 groups (high, moderate, low) using cut-off of over 50 excess MET per week, between 10 and 50 excess METs per week and less than 10 excess MET per week. These cut-off have been used by Perez-Cornago et al. [14]. Participants with missing information and participants who reported they were unable to walk were grouped in an 'unknown' group (4.0%).

#### Alcohol intake:

Alcohol intake was assessed with 6 questions covering *monthly* intake of red wine 'In an average month, how many glasses of red wine would you drink? (There are six glasses in an average bottle)', white wine or champagne 'In an average month, how many glasses of white wine or champagne would you drink? (There are six glasses in an average bottle)', beer plus cider 'In an average month, how many pints of beer or cider would you drink? (Include bitter, lager, stout, ale, Guinness)', spirits 'In an average month, how many measures of spirits or liqueurs would you drink? (there are 25 standard measures in a normal sized bottle; spirits include drinks such as whisky, gin, rum, vodka, brandy)', and fortified wine 'In an average month, how many glasses of fortifies wine would you drink? (There are 12 glasses in an average bottle) (Fortified wines include drinks such as sherry, port,

vermouth); 6 questions covering *weekly* intake of the above types of alcoholic beverages, and one questions on overall alcohol intake frequency 'About how often do you drink alcohol?' which included a scale of 'Daily or almost daily', 'Three or four times a week', 'Once or twice a week', 'One to three times a month', 'Special occasions only', 'Never' and 'Prefer not to answer'. Red wine, white wine, spirits and fortified wines were assigned an average of 10 g alcohol per serving, beer and cider 20g alcohol per serving. Total drinking per day was calculated from total alcohol intake per week and month, where weekly intakes were unavailable. Total drinking was categories into 4 groups: 'non-drinker', '<1 g/day', '1-<10 g/day', '10-<20 g/day', '≥20 g/day' and 'unknown' (0.7%). Participants reporting their overall drinking frequency as drinking only at special occasions were added to the group of those drinking less than 1g/day and those reporting never drinking alcohol were categorised as never-drinkers.

#### Total fruit and vegetable intake:

Fruit and vegetable intake was based on touchscreen questions regarding cooked vegetables 'On average how many heaped tablespoons of cooked vegetables would you eat per day? (Do not include potatoes; put '0' if you do not eat any)', raw vegetables 'On average how many heaped tablespoons of salad or raw vegetables would you eat per day? (Include lettuce, tomato in sandwiches; put '0' if you do not eat any)', questions included a depiction of what a heaped tablespoon of these types of vegetables would look like on an average sized plate, and fresh fruit 'About how many pieces of fresh fruit would you eat per day? (Count one apple, one banana, 10 grapes etc. as one piece; put '0' if you do not eat any)'. We considered one serving of either fruit or vegetables as one piece of fruit and two heaped tablespoon of vegetables, respectively. The sum of servings of either fruit or vegetables was categorised as '≤3 servings/day', '3-<4 servings/day', '4-<6 servings/day', '≥6 servings/day' and 'unknown' (2.3%).

#### Estimated cereal fibre intake:

Fibre intake from bread and cereal was estimated based on a method used by Bradbury at al. in the same dataset, and all details can be found in the original publication [5]. Briefly, fibre intake was calculated by multiplying frequency of intakes with fibre content of the type of bread and cereal reported being mainly eaten. Frequency of bread and cereal intake was based on the questions 'How many slices of bread do you eat each week' and 'How many bowls of cereal do you eat a week?' with an open ended answer, and additional options less than one, do not know or prefer not to answer. If these questions were answered with one or more times a second question was asked ('What type of bread do you mainly eat?') with possible answers 'White', 'Brown', 'Wholemeal or wholegrain', 'Other type of bread', 'Do not know' and 'Prefer not to answer' and respectively 'What type of cereal do you mainly eat?' with possible answers 'Bran cereal (e.g. All Bran, Branflakes)', 'Biscuit cereal (e.g. Weetabix)', 'Oat cereal (e.g. Ready Brek, porridge)', 'Muesli/ Other (e.g. Cornflakes, Frosties)', 'Do not know' and 'Prefer not to answer'. Estimated fibre intake from bread and breakfast cereal was categorised into sex-specific quintiles (Women: Q1: mean 1.05 g/day, Q2: mean 2.47 g/day, Q3: mean 3.73 g/day Q4: mean 5.28 g/day, Q5: mean 8.42 g/day; Men: Q1: mean 1.30 g/day, Q2: mean

2.81 g/day, Q3: mean 4.31 g/day, Q4: mean 6.18 g/day, Q5: mean 9.85 g/day). Participants who did not report intake of bread and cereals or preferred not to answer were grouped as 'unknown' (2.4%).

#### Menopausal status:

Menopausal status was assessed using the question 'Have you had your menopause (periods stopped)?'. For participants who answered this question with 'not sure had hysterectomy', 'not sure other reason' or 'prefer not to answer' information on bilateral oophorectomy, use of HRT and age at recruitment were used to categorise participants. Participants were categorised postmenopausal if they (1) reported having their menopause ('Have you had your menopause (periods stopped)?'), (2) were over the age of 53, (3) reported a bilateral oophorectomy ('Have you had both ovaries removed?') or (4) reported Hormone replacement therapy (HRT) use. Participants were categorised 'premenopausal' if they reported: (1) not having their menopause, (2) were younger than 45 and (3) did not report a bilateral oophorectomy. Participants were regrouped to 'menopause' if they reported to not have their menopause but were over the age of 55 at recruitment and regrouped into an 'unknown' category if they reported not having had their menopause but having had a bilateral oophorectomy or having used HRT. Participants with missing information on menopausal status and who could not be reassigned using the additional information as described above were also grouped into the 'unknown' category (5.7%).

#### Parity:

Parity was assessed with the question 'How many children have you given birth to? (Please include live births only)' in the baseline touchscreen questionnaire. We categorised parity into 'nulliparous', 'one to two', 'three or more'. Participants, who did not answer this question or answered 'Prefer not to answer', were grouped in an 'unknown' category (0.3%).

#### HRT:

Use of HRT was assessed using three questions to assign the categories 'never', 'past', 'current', and 'unknown'. Never was assigned to those who replied 'no' to the question 'Have you ever used hormone replacement therapy (HRT)?' those who answered 'do not know', 'prefer not to answer' or who were missing an answer to this question were grouped 'unknown' (0.6%). Current and former intake was assessed comparing age at recruitment with answers to the questions 'How old were you when you last used HRT?' and 'How old were you when you first used HRT' that were asked after they had indicated that they had used HRT.

#### Oral contraceptive pill (OCP):

OCP intake was assessed using three questions to assign the categories 'never', 'past', 'current', and 'unknown'. Never was assigned to those who replied 'no' to the question 'Have you ever taken the contraceptive pill? (include the 'mini pill')', those replied 'do not know', 'prefer not to answer' or who were missing an answer were grouped 'unknown' (0.5%). Current and former intake was assessed comparing age at recruitment with answers to the questions 'How old were you when you last used the contraceptive pill?' and 'How old were you when you first went on the contraceptive pill' that were asked after they had indicated that they had used the contraceptive pill.



#### Skin colour:

Skin colour was assessed with the question 'What best describes your skin without tanning?'. We categorised answers into 'very fair', 'fair', 'light olive', 'dark olive', 'brown/black'. Participants, who did not answer this question, reported 'Do not know' or 'Prefer not to answer' were grouped in an 'unknown' category (1.6%).

#### Hair colour:

Hair colour was assessed with the question 'What best describes your natural hair colour? (If your hair colour is grey, the colour before you went grey)'. Answers were categorised into 'blonde', 'red', 'light brown', 'dark brown' and 'black'. Participants, who did not answer this question, reported 'other', 'Do not know' or 'Prefer not to answer' were grouped in an 'unknown' category (1.7%).

#### Skin reaction to sun exposure:

Skin reaction to sun exposure was assessed with the question 'What would happen to your skin if it was repeatedly exposed to bright sunlight without any protection'. Answers were categorised into 'get very tanned', 'get moderately tanned', 'get mildly or occasionally tanned' and 'never tan, only burn'. Participants, who did not answer this question, reported 'Do not know' or 'Prefer not to answer' were grouped in an 'unknown' category (3.7%).

#### Sun or UV protection use:

Use of sun or UV protection was assessed with the question 'Do you wear sun protection (e.g. sunscreen lotion, hat) when you spend time outdoors in the summer?'. Answers were categorised into 'never/rarely', 'sometime', 'most of the time', 'always' and 'do not go out in sunshine'. Participants, who did not answer this question, reported 'Do not know' or 'Prefer not to answer' were grouped in an 'unknown' category (1.2%).

#### Sunburns before age 15:

History of childhood sunburn was identified with the question 'Before the age of 15, how many times did you suffer sunburn that was painful for at least 2 days or caused blistering'. We dichotomised answers to never versus ever. Participants, who did not answer this question, answered 'Do not know' or 'Prefer not to answer' were grouped in an 'unknown' category (25.1%).

#### Solarium use:

Solarium use was assessed with the question 'How many times a year would you use a solarium or sunlamp?'. We categorised answers into 'never', '>0-2 times a year' and '≥3 times a year'. Participants, who did not answer this question, reported 'Do not know' or 'Prefer not to answer' were grouped in an 'unknown' category (2.1%).

## References

1. UK Biobank Coordinating Centre. Ammendum to Main Study Protocol: Category 1 enhanced phenotyping at baseline assessment visit in last 200,000 participants and subsequent invitation to complete web-based diet questionnaire. Stockport: UK Biobank Coordinating Centre; 2009.
2. Greenwood DC, Hardie LJ, Frost GS, Alwan NA, Bradbury KE, Carter M, et al. Validation of the Oxford WebQ Online 24-hour Dietary Questionnaire Using Biomarkers. *American Journal of Epidemiology*. 2019. <https://doi.org/10.1093/aje/kwz165>. PMID: 31318012.
3. Galante J, Adamska L, Young A, Young H, Littlejohns TJ, Gallacher J, et al. The acceptability of repeat Internet-based hybrid diet assessment of previous 24-h dietary intake: administration of the Oxford WebQ in UK Biobank. *Br J Nutr*. 2015;115(4):681-6. Epub 12/11. <https://doi.org/10.1017/S0007114515004821>. PMID: 26652593.
4. Willett W. *Nutritional epidemiology*. 3rd ed. Oxford: Oxford University Press; 2013.
5. Bradbury KE, Young HJ, Guo W, Key TJ. Dietary assessment in UK Biobank: an evaluation of the performance of the touchscreen dietary questionnaire. *J Nutr Sci*. 2018;7:e6. Epub 02/01. <https://doi.org/10.1017/jns.2017.66>. PMID: 29430297.
6. Key TJ, Balkwill A, Bradbury KE, Reeves GK, Kuan AS, Simpson RF, et al. Foods, macronutrients and breast cancer risk in postmenopausal women: a large UK cohort. *Int J Epidemiol*. 2018:dyy238-dyy. <https://doi.org/10.1093/ije/dyy238>. PMID: 30412247.
7. Clarke R, Shipley M, Lewington S, Youngman L, Collins R, Marmot M, et al. Underestimation of risk associations due to regression dilution in long-term follow-up of prospective studies. *Am J Epidemiol*. 1999;150(4):341-53. Epub 1999/08/24. <https://doi.org/10.1093/oxfordjournals.aje.a010013>. PMID: 10453810.
8. University of East Anglia SoES, University of Manchester, Cathie Marsh Centre for Census and Survey Research, University of Manchester, MIMAS, Census Dissemination Unit (CDU). *Deprivation Scores Based on 1991 and 2001 Census Area Statistics*. [data collection]. 2nd Edition. SN: 5850, 2013.
9. Townsend P, Phillimore P, Beattie A. *Health and deprivation: inequality and the north*. London: Routledge; 1989.
10. Craig CL, Marshall AL, Sjöström M, Bauman AE, Booth ML, Ainsworth BE, et al. International Physical Activity Questionnaire: 12-Country reliability and validity. *Medicine and science in sports and exercise*. 2003;35(8):1381-95. <https://doi.org/10.1249/01.MSS.0000078924.61453.FB>. PMID: 12900694.
11. IPAQ. *Guidelines for Data Processing and Analysis of the International Physical activity Questionnaire (IPAQ) - Short and Long Forms 2005* [cited 2018 30/10/2018]. Available from: <https://docs.google.com/viewer?a=v&pid=sites&srcid=ZGVmYXVsdGRvbWFpbX0aGVpcGFxfGd4OjE0NDQxMDk3NDU1YWZlZTM>.
12. Armstrong MEG, Cairns BJ, Green J, Reeves GK, Beral V, The Million Women Study Collaborators. Reported frequency of physical activity in a large epidemiological study: relationship to specific activities and repeatability over time. *BMC Med Res Methodol*. 2011;11(1):97. <https://doi.org/10.1186/1471-2288-11-97>. PMID: 21831330.
13. Howley ET. Type of activity: resistance, aerobic and leisure versus occupational physical activity. *Medicine and science in sports and exercise*. 2001;33(6 Suppl):S364-9; discussion S419-20. Epub 28/06/2001. PMID: 11427761.
14. Perez-Cornago A, Key TJ, Allen NE, Fensom GK, Bradbury KE, Martin RM, et al. Prospective investigation of risk factors for prostate cancer in the UK Biobank cohort study. *Br J Cancer*. 2017;117:1562. <https://doi.org/10.1038/bjc.2017.312>. PMID: 28910820.

## Supplementary Tables

**S1 Table. Baseline distribution of meat intake of included UK Biobank participants**

| Meat intake                 | g/day* | All participants (n = 475,023) | Participants who developed any incident cancer (n = 28,955) |
|-----------------------------|--------|--------------------------------|-------------------------------------------------------------|
| Total meat, n (%)           |        |                                |                                                             |
| <3 times/week               | 33.7   | 57,969 (12.2)                  | 3,006 (10.4)                                                |
| 3-<5 times/week             | 84.7   | 119,282 (25.1)                 | 7,517 (26.0)                                                |
| 5-<7 times/week             | 99.2   | 153,688 (32.4)                 | 9,417 (32.5)                                                |
| ≥7 times/week               | 116.2  | 136,481 (28.7)                 | 8,539 (29.5)                                                |
| Unknown                     |        | 7,603 (1.6)                    | 476 (1.6)                                                   |
| Red & processed meat, n (%) |        |                                |                                                             |
| ≤1 times/week               | 10.5   | 44,027 (9.3)                   | 2,090 (7.2)                                                 |
| >1-<3 times/week            | 48.7   | 160,080 (33.7)                 | 9,460 (32.7)                                                |
| 3-<5 times/week             | 65.0   | 140,683 (29.6)                 | 8,849 (30.6)                                                |
| ≥5 times/week               | 79.3   | 122,987 (25.9)                 | 8,105 (28.0)                                                |
| Unknown                     |        | 7,246 (1.5)                    | 451 (1.6)                                                   |
| Red meat, n (%)             |        |                                |                                                             |
| <1 times/week               | 6.5    | 47,725 (10.0)                  | 2,310 (8.0)                                                 |
| 1-<2 times/week             | 32.6   | 184,629 (38.9)                 | 10,809 (37.3)                                               |
| 2-<4 times/week             | 45.1   | 173,889 (36.6)                 | 11,338 (39.2)                                               |
| ≥4 times/week               | 55.1   | 62,121 (13.1)                  | 4,088 (14.1)                                                |
| Unknown                     |        | 6,659 (1.4)                    | 410 (1.4)                                                   |
| Processed meat, n (%)       |        |                                |                                                             |
| 0 times/week                | 4.1    | 44,046 (9.3)                   | 2,194 (7.6)                                                 |
| >0-<1 times/week            | 15.6   | 143,524 (30.2)                 | 8,529 (29.5)                                                |
| 1-<2 times/week             | 21.3   | 138,083 (29.1)                 | 8,708 (30.1)                                                |
| ≥2 times/week               | 29.1   | 147,228 (31.0)                 | 9,406 (32.5)                                                |
| Unknown                     |        | 2,142 (0.5)                    | 118 (0.4)                                                   |
| Poultry, n (%)              |        |                                |                                                             |
| <1 times/week               | 12.2   | 75,015 (15.8)                  | 4,597 (15.9)                                                |
| 1-<2 times/week             | 27.4   | 169,479 (35.7)                 | 11,027 (38.1)                                               |
| ≥2 times/week               | 39.4   | 228,554 (48.1)                 | 13,230 (45.7)                                               |
| Unknown                     |        | 1,975 (0.4)                    | 101 (0.3)                                                   |

\*Mean intakes are based on participants with re-measured 24-h dietary recall based on the WebQ.

**S2 Table. Baseline characteristics by red and processed meat intake**

| Characteristics†                                      | Red and processed meat intake (times/week), (mean g/day*) |                |                |                |
|-------------------------------------------------------|-----------------------------------------------------------|----------------|----------------|----------------|
|                                                       | ≤1 (10.5)                                                 | >1-<3 (48.7)   | 3-<5 (65.0)    | ≥5 (79.3)      |
| <b>Sociodemographic</b>                               |                                                           |                |                |                |
| Sex, n (%)                                            |                                                           |                |                |                |
| Women                                                 | 31,323 (71.1)                                             | 101,755 (63.6) | 71,684 (51.0)  | 47,660 (38.8)  |
| Men                                                   | 12,704 (28.9)                                             | 58,325 (36.4)  | 68,999 (49.0)  | 75,327 (61.2)  |
| Age (years)                                           | 54.9 (8.2)                                                | 56.5 (8.0)     | 56.4 (8.1)     | 56.5 (8.2)     |
| Ethnicity, n (%)                                      |                                                           |                |                |                |
| White                                                 | 38,458 (87.4)                                             | 151,738 (94.8) | 134,518 (95.6) | 116,823 (95.0) |
| Asian or Asian British                                | 3,468 (7.9)                                               | 2,914 (1.8)    | 2,245 (1.6)    | 1,897 (1.5)    |
| Black or Black British                                | 886 (2.0)                                                 | 2,607 (1.6)    | 1,685 (1.2)    | 2,047 (1.7)    |
| Mixed Race or other                                   | 998 (2.3)                                                 | 2,323 (1.5)    | 1,807 (1.3)    | 1,774 (1.4)    |
| Unknown                                               | 217 (0.5)                                                 | 498 (0.3)      | 428 (0.3)      | 446 (0.4)      |
| Townsend deprivation, n (%)                           |                                                           |                |                |                |
| Most affluent (mean -4.7)                             | 7,038 (16.0)                                              | 32,848 (20.5)  | 29,803 (21.2)  | 24,668 (20.1)  |
| 2 (mean -3.3)                                         | 7,547 (17.1)                                              | 32,869 (20.5)  | 29,202 (20.8)  | 24,403 (19.8)  |
| 3 (mean -2.1)                                         | 8,355 (19.0)                                              | 32,757 (20.5)  | 28,326 (20.1)  | 24,346 (19.8)  |
| 4 (mean -0.9)                                         | 10,138 (23.0)                                             | 31,701 (19.8)  | 27,420 (19.5)  | 24,043 (19.5)  |
| Most deprived (mean 3.8)                              | 10,887 (24.7)                                             | 29,690 (18.5)  | 25,779 (18.3)  | 25,375 (20.6)  |
| Unknown                                               | 62 (0.1)                                                  | 215 (0.1)      | 153 (0.1)      | 152 (0.1)      |
| Qualification, n (%)                                  |                                                           |                |                |                |
| College or university degree/vocational qualification | 28,497 (64.7)                                             | 96,080 (60.0)  | 82,369 (58.5)  | 72,442 (58.9)  |
| National examination at ages 17-18                    | 2,491 (5.7)                                               | 8,708 (5.4)    | 7,796 (5.5)    | 6,626 (5.4)    |
| National examination at age 16                        | 6,321 (14.4)                                              | 27,682 (17.3)  | 24,135 (17.2)  | 19,676 (16.0)  |
| Other/unknown                                         | 6,718 (15.3)                                              | 27,610 (17.2)  | 26,383 (18.8)  | 24,243 (19.7)  |
| Employment, n (%)                                     |                                                           |                |                |                |
| In paid employment                                    | 27,657 (62.8)                                             | 93,973 (58.7)  | 81,649 (58.0)  | 70,105 (57.0)  |
| Pension                                               | 10,229 (23.2)                                             | 48,221 (30.1)  | 42,698 (30.4)  | 37,181 (30.2)  |
| Not in paid employment                                | 5,557 (12.6)                                              | 16,487 (10.3)  | 15,237 (10.8)  | 14,565 (11.8)  |
| Unknown                                               | 584 (1.3)                                                 | 1,399 (0.9)    | 1,099 (0.8)    | 1,136 (0.9)    |
| Living with a spouse/partner, n (%)                   |                                                           |                |                |                |
| Living with partner                                   | 27,161 (61.7)                                             | 112,484 (70.3) | 107,081 (76.1) | 93,472 (76.0)  |
| Not living with partner                               | 16,570 (37.6)                                             | 46,937 (29.3)  | 33,192 (23.6)  | 29,125 (23.7)  |
| Unknown                                               | 296 (0.7)                                                 | 659 (0.4)      | 410 (0.3)      | 390 (0.3)      |
| <b>Anthropometric</b>                                 |                                                           |                |                |                |
| Standing height (cm) in women                         | 162.5 (6.5)                                               | 162.6 (6.3)    | 162.5 (6.3)    | 162.3 (6.3)    |
| Standing height (cm) in men                           | 175.3 (7.1)                                               | 175.7 (6.8)    | 175.8 (6.8)    | 175.7 (6.8)    |
| BMI (kg/m <sup>2</sup> ), mean (SD)                   | 25.9 (4.7)                                                | 27.1 (4.7)     | 27.6 (4.8)     | 28.1 (4.9)     |
| <b>Lifestyle</b>                                      |                                                           |                |                |                |
| Smoking, n (%)                                        |                                                           |                |                |                |
| None                                                  | 26,348 (59.8)                                             | 90,453 (56.5)  | 76,690 (54.5)  | 62,691 (51.0)  |
| Former                                                | 13,967 (31.7)                                             | 54,802 (34.2)  | 48,536 (34.5)  | 43,272 (35.2)  |
| Current <15 cigarettes/day                            | 1,297 (2.9)                                               | 4,581 (2.9)    | 4,247 (3.0)    | 4,074 (3.3)    |
| Current ≥15 cigarettes/day                            | 1,030 (2.3)                                               | 4,825 (3.0)    | 6,014 (4.3)    | 7,623 (6.2)    |
| Current, amount unknown                               | 1,214 (2.8)                                               | 4,876 (3.0)    | 4,727 (3.4)    | 4,914 (4.0)    |
| Unknown                                               | 171 (0.4)                                                 | 543 (0.3)      | 469 (0.3)      | 413 (0.3)      |
| Physical activity level, n (%)                        |                                                           |                |                |                |
| High ≥50 excess METs                                  | 7,773 (17.7)                                              | 24,717 (15.4)  | 21,860 (15.5)  | 20,458 (16.6)  |
| Moderate 10-<50 excess METs                           | 22,381 (50.8)                                             | 80,044 (50.0)  | 68,201 (48.5)  | 58,009 (47.2)  |
| Low <10 excess METs                                   | 12,408 (28.2)                                             | 49,712 (31.1)  | 45,471 (32.3)  | 39,711 (32.3)  |
| Unknown                                               | 1,465 (3.3)                                               | 5,607 (3.5)    | 5,151 (3.7)    | 4,809 (3.9)    |
| Alcohol intake, n (%)                                 |                                                           |                |                |                |
| None drinkers                                         | 7,506 (17.0)                                              | 11,941 (7.5)   | 9,611 (6.8)    | 7,793 (6.3)    |
| <1 g/day                                              | 6,814 (15.5)                                              | 19,867 (12.4)  | 14,470 (10.3)  | 10,863 (8.8)   |
| 1-<10 g/day                                           | 14,744 (33.5)                                             | 57,217 (35.7)  | 43,230 (30.7)  | 31,589 (25.7)  |
| 10-<20 g/day                                          | 7,987 (18.1)                                              | 36,198 (22.6)  | 31,683 (22.5)  | 25,627 (20.8)  |
| ≥20 g/day                                             | 6,740 (15.3)                                              | 34,047 (21.3)  | 41,070 (29.2)  | 46,546 (37.8)  |
| Unknown                                               | 236 (0.5)                                                 | 810 (0.5)      | 619 (0.4)      | 569 (0.5)      |
| <b>Diet</b>                                           |                                                           |                |                |                |
| Fruit & vegetable intake (servings/day)               | 5.59 (3.19)                                               | 4.89 (2.54)    | 4.50 (2.45)    | 4.33 (2.50)    |
| Estimated cereal fibre intake (g/day)                 | 4.66 (3.11)                                               | 4.52 (2.89)    | 4.52 (2.91)    | 4.44 (2.96)    |
| <b>Women's health</b>                                 |                                                           |                |                |                |

|                                        |               |                |                |                |
|----------------------------------------|---------------|----------------|----------------|----------------|
| Menopausal status, n (%)               |               |                |                |                |
| Premenopausal                          | 8,962 (28.6)  | 22,948 (22.6)  | 17,040 (23.8)  | 11,209 (23.5)  |
| Postmenopausal                         | 20,589 (65.7) | 73,273 (72.0)  | 50,663 (70.7)  | 33,726 (70.8)  |
| Unknown                                | 1,772 (5.7)   | 5,534 (5.4)    | 3,981 (5.6)    | 2,725 (5.7)    |
| Parity, n (%)                          |               |                |                |                |
| 0 births                               | 8,318 (26.6)  | 19,784 (19.4)  | 11,740 (16.4)  | 7,299 (15.3)   |
| 1- 2 births                            | 16,232 (51.8) | 58,208 (57.2)  | 42,078 (58.7)  | 27,656 (58.0)  |
| ≥3 births                              | 6,717 (21.4)  | 23,672 (23.3)  | 17,812 (24.8)  | 12,655 (26.6)  |
| Unknown                                | 56 (0.2)      | 91 (0.1)       | 54 (0.1)       | 50 (0.1)       |
| Hormone replacement therapy use, n (%) |               |                |                |                |
| Never                                  | 21,441 (68.5) | 61,916 (60.8)  | 44,011 (61.4)  | 28,978 (60.8)  |
| Past                                   | 7,951 (25.4)  | 33,165 (32.6)  | 23,018 (32.1)  | 15,560 (32.6)  |
| Current                                | 1,773 (5.7)   | 6,379 (6.3)    | 4,429 (6.2)    | 2,897 (6.1)    |
| Unknown                                | 158 (0.5)     | 295 (0.3)      | 226 (0.3)      | 225 (0.5)      |
| Oral contraceptive pill use, n (%)     |               |                |                |                |
| Never                                  | 6,598 (21.1)  | 18,180 (17.9)  | 12,850 (17.9)  | 8,919 (18.7)   |
| Past                                   | 23,877 (76.2) | 81,535 (80.1)  | 57,270 (79.9)  | 37,643 (79.0)  |
| Current                                | 691 (2.2)     | 1,813 (1.8)    | 1,388 (1.9)    | 918 (1.9)      |
| Unknown                                | 157 (0.5)     | 227 (0.2)      | 176 (0.2)      | 180 (0.4)      |
| <b>Men's health</b>                    |               |                |                |                |
| Enlarged prostate, n (%)               |               |                |                |                |
| No/unknown                             | 43,635 (99.1) | 157,984 (98.7) | 138,441 (98.4) | 120,712 (98.2) |
| Yes                                    | 392 (0.9)     | 2,096 (1.3)    | 2,242 (1.6)    | 2,275 (1.8)    |
| <b>Skin cancer related factors</b>     |               |                |                |                |
| Skin colour, n (%)                     |               |                |                |                |
| Very fair                              | 4,024 (9.1)   | 12,051 (7.5)   | 10,257 (7.3)   | 9,329 (7.6)    |
| Fair                                   | 26,991 (61.3) | 106,840 (66.7) | 96,058 (68.3)  | 83,968 (68.3)  |
| Light olive                            | 8,145 (18.5)  | 30,901 (19.3)  | 25,896 (18.4)  | 21,300 (17.3)  |
| Dark olive                             | 796 (1.8)     | 2,836 (1.8)    | 2,612 (1.9)    | 2,418 (2.0)    |
| Brown/black                            | 3,450 (7.8)   | 5,449 (3.4)    | 4,014 (2.9)    | 4,157 (3.4)    |
| Unknown                                | 621 (1.4)     | 2,003 (1.3)    | 1,846 (1.3)    | 1,815 (1.5)    |
| Hair colour, n (%)                     |               |                |                |                |
| Blonde                                 | 4,223 (9.6)   | 17,299 (10.8)  | 14,933 (10.6)  | 12,947 (10.5)  |
| Red                                    | 1,977 (4.5)   | 7,011 (4.4)    | 5,902 (4.2)    | 5,056 (4.1)    |
| Light brown                            | 15,605 (35.4) | 62,217 (38.9)  | 54,767 (38.9)  | 47,003 (38.2)  |
| Dark brown                             | 16,815 (38.2) | 59,983 (37.5)  | 52,499 (37.3)  | 45,152 (36.7)  |
| Black                                  | 4,886 (11.1)  | 11,538 (7.2)   | 10,568 (7.5)   | 10,929 (8.9)   |
| Other/unknown                          | 521 (1.2)     | 2,032 (1.3)    | 2,014 (1.4)    | 1,900 (1.5)    |
| Skin reaction, n (%)                   |               |                |                |                |
| Get very tanned                        | 8,779 (19.9)  | 32,382 (20.2)  | 29,384 (20.9)  | 27,429 (22.3)  |
| Moderately tanning                     | 15,901 (36.1) | 62,216 (38.9)  | 54,898 (39.0)  | 47,573 (38.7)  |
| Mildly/occasionally tanning            | 9,683 (22.0)  | 33,705 (21.1)  | 28,998 (20.6)  | 23,713 (19.3)  |
| Never tanning, only burning            | 7,658 (17.4)  | 26,683 (16.7)  | 23,002 (16.4)  | 20,158 (16.4)  |
| Unknown                                | 2,006 (4.6)   | 5,094 (3.2)    | 4,401 (3.1)    | 4,114 (3.3)    |
| UV protection use, n (%)               |               |                |                |                |
| Never/rarely, n (%)                    | 5,220 (11.9)  | 12,695 (7.9)   | 13,447 (9.6)   | 15,808 (12.9)  |
| Sometimes                              | 12,597 (28.6) | 49,434 (30.9)  | 47,891 (34.0)  | 44,839 (36.5)  |
| Most of the time                       | 14,717 (33.4) | 58,318 (36.4)  | 50,347 (35.8)  | 40,856 (33.2)  |
| Always                                 | 10,459 (23.8) | 37,399 (23.4)  | 27,087 (19.3)  | 19,655 (16.0)  |
| Do not go out in the sunshine          | 511 (1.2)     | 851 (0.5)      | 681 (0.5)      | 694 (0.6)      |
| Unknown                                | 523 (1.2)     | 1,383 (0.9)    | 1,230 (0.9)    | 1,135 (0.9)    |
| Solarium use, n (%)                    |               |                |                |                |
| Never                                  | 39,008 (88.6) | 142,438 (89.0) | 125,412 (89.1) | 109,209 (88.8) |
| >0-2 times/year                        | 2,258 (5.1)   | 8,993 (5.6)    | 7,951 (5.7)    | 7,378 (6.0)    |
| ≥3 times/year                          | 1,619 (3.7)   | 6,124 (3.8)    | 5,017 (3.6)    | 4,198 (3.4)    |
| Unknown                                | 1,142 (2.6)   | 2,525 (1.6)    | 2,303 (1.6)    | 2,202 (1.8)    |
| Childhood sunburn, n (%)               |               |                |                |                |
| Never                                  | 19,333 (43.9) | 67,048 (41.9)  | 56,575 (40.2)  | 47,525 (38.6)  |
| Ever                                   | 14,564 (33.1) | 53,785 (33.6)  | 48,804 (34.7)  | 44,470 (36.2)  |
| Unknown                                | 10,130 (23.0) | 39,247 (24.5)  | 35,304 (25.1)  | 30,992 (25.2)  |
| <b>Meat intake*</b>                    |               |                |                |                |
| Total meat, n (%)                      |               |                |                |                |
| <3 times/week (mean 33.7 g/day)        | 33,507 (76.1) | 24,462 (15.3)  | 0 (0.0)        | 0 (0.0)        |

|                                     |               |                |               |               |
|-------------------------------------|---------------|----------------|---------------|---------------|
| 3-<5 times/week (mean 84.7 g/day)   | 9,413 (21.4)  | 71,012 (44.4)  | 38,857 (27.6) | 0 (0.0)       |
| 5-<7 times/week (mean 99.2 g/day)   | 905 (2.1)     | 61,070 (38.1)  | 64,865 (46.1) | 26,848 (21.8) |
| ≥7 times/week (mean 116.2 g/day)    | 144 (0.3)     | 3,426 (2.1)    | 36,865 (26.2) | 96,046 (78.1) |
| Unknown, n(%)                       | 58 (0.1)      | 110 (0.1)      | 96 (0.1)      | 93 (0.1)      |
| Red meat, n (%)                     |               |                |               |               |
| <1 times/week (mean 6.5 g/day)      | 39,848 (90.5) | 3,414 (2.1)    | 3,719 (2.6)   | 639 (0.5)     |
| 1-<2 times/week (mean 32.6 g/day)   | 4,179 (9.5)   | 128,320 (80.2) | 45,920 (32.6) | 5,991 (4.9)   |
| 2-<4 times/week (mean 45.1 g/day)   | 0 (0.0)       | 28,346 (17.7)  | 83,920 (59.7) | 61,458 (50.0) |
| ≥4 times/week (mean 55.1 g/day)     | 0 (0.0)       | 0 (0.0)        | 7,124 (5.1)   | 54,899 (44.6) |
| Processed meat, n (%)               |               |                |               |               |
| 0 times/week (mean 4.1 g/day)       | 31,724 (72.1) | 8,781 (5.5)    | 2,543 (1.8)   | 686 (0.6)     |
| >0- <1 times/week (mean 15.6 g/day) | 10,548 (24.0) | 94,759 (59.2)  | 28,538 (20.3) | 8,397 (6.8)   |
| 1-<2 times/week (mean 21.3 g/day)   | 1,755 (4.0)   | 56,540 (35.3)  | 59,963 (42.6) | 18,212 (14.8) |
| ≥2 times/week (mean 29.1 g/day)     | 0 (0.0)       | 0 (0.0)        | 49,639 (35.3) | 95,692 (77.8) |
| Poultry, n (%)                      |               |                |               |               |
| <1 times/week (mean 12.2 g/day)     | 26,366 (59.9) | 23,492 (14.7)  | 13,479 (9.6)  | 10,760 (8.7)  |
| 1-<2 times/week (mean 27.4 g/day)   | 7,141 (16.2)  | 61,116 (38.2)  | 56,697 (40.3) | 42,295 (34.4) |
| ≥2 times/week (mean 39.4 g/day)     | 10,462 (23.8) | 75,362 (47.1)  | 70,411 (50.0) | 69,839 (56.8) |
| Unknown                             | 58 (0.1)      | 110 (0.1)      | 96 (0.1)      | 93 (0.1)      |

BMI, Body mass index; MET, metabolic equivalents.

\*Mean intakes are based on participants with re-measured 24-h dietary recall based on the WebQ.

†Mean (Standard deviation) unless otherwise specified.

**S3 Table. Baseline characteristics by poultry intake**

| Characteristics†                                      | Poultry intake (times/week), (mean g/day*) |                |                |
|-------------------------------------------------------|--------------------------------------------|----------------|----------------|
|                                                       | ≤1 (12.2)                                  | >1- <3 (27.4)  | 3-<5 (39.4)    |
| <b>Sociodemographic</b>                               |                                            |                |                |
| Sex, n (%)                                            |                                            |                |                |
| Women                                                 | 41,883 (55.8)                              | 88,925 (52.5)  | 124,256 (54.4) |
| Men                                                   | 33,132 (44.2)                              | 80,554 (47.5)  | 104,298 (45.6) |
| Age (years)                                           | 56.6 (8.1)                                 | 57.2 (7.9)     | 55.5 (8.1)     |
| Ethnicity, n (%)                                      |                                            |                |                |
| White                                                 | 69,358 (92.5)                              | 161,955 (95.6) | 214,134 (93.7) |
| Asian or Asian British                                | 3,216 (4.3)                                | 3,004 (1.8)    | 4,822 (2.1)    |
| Black or Black British                                | 903 (1.2)                                  | 1,872 (1.1)    | 4,937 (2.2)    |
| Mixed Race or other                                   | 1,162 (1.5)                                | 2,108 (1.2)    | 3,913 (1.7)    |
| Unknown                                               | 376 (0.5)                                  | 540 (0.3)      | 748 (0.3)      |
| Townsend deprivation, n (%)                           |                                            |                |                |
| Most affluent (mean -4.7)                             | 11,932 (15.9)                              | 35,281 (20.8)  | 47,662 (20.9)  |
| 2 (mean -3.3)                                         | 13,076 (17.4)                              | 34,755 (20.5)  | 46,802 (20.5)  |
| 3 (mean -2.1)                                         | 14,561 (19.4)                              | 34,075 (20.1)  | 45,932 (20.1)  |
| 4 (mean -0.9)                                         | 16,861 (22.5)                              | 33,073 (19.5)  | 44,536 (19.5)  |
| Most deprived (mean 3.8)                              | 18,499 (24.7)                              | 32,125 (19.0)  | 43,287 (18.9)  |
| Unknown                                               | 86 (0.1)                                   | 170 (0.1)      | 335 (0.1)      |
| Qualification, n (%)                                  |                                            |                |                |
| College or university degree/vocational qualification | 46,754 (62.3)                              | 98,313 (58.0)  | 136,126 (59.6) |
| National examination at ages 17-18                    | 3,846 (5.1)                                | 8,752 (5.2)    | 13,188 (5.8)   |
| National examination at age 16                        | 10,302 (13.7)                              | 27,992 (16.5)  | 40,291 (17.6)  |
| Other/unknown                                         | 14,113 (18.8)                              | 34,422 (20.3)  | 38,949 (17.0)  |
| Employment, n (%)                                     |                                            |                |                |
| In paid employment                                    | 42,596 (56.8)                              | 93,622 (55.2)  | 139,540 (61.1) |
| Pension                                               | 21,967 (29.3)                              | 55,867 (33.0)  | 62,017 (27.1)  |
| Not in paid employment                                | 9,566 (12.8)                               | 18,410 (10.9)  | 24,993 (10.9)  |
| Unknown                                               | 886 (1.2)                                  | 1,580 (0.9)    | 2,004 (0.9)    |
| Living with a spouse/partner, n (%)                   |                                            |                |                |
| Living with partner                                   | 46,848 (62.5)                              | 125,387 (74.0) | 171,042 (74.8) |
| Not living with partner                               | 27,739 (37.0)                              | 43,436 (25.6)  | 56,709 (24.8)  |
| Unknown                                               | 428 (0.6)                                  | 656 (0.4)      | 803 (0.4)      |
| <b>Anthropometric</b>                                 |                                            |                |                |
| Standing height (cm) in women                         | 162.6 (6.5)                                | 162.4 (6.3)    | 162.4 (6.3)    |
| Standing height (cm) in men                           | 175.4 (7.0)                                | 175.6 (6.9)    | 175.8 (6.8)    |
| BMI (kg/m <sup>2</sup> )                              | 26.6 (4.8)                                 | 27.3 (4.6)     | 27.8 (4.9)     |
| <b>Lifestyle</b>                                      |                                            |                |                |
| Smoking, n (%)                                        |                                            |                |                |
| None                                                  | 39,774 (53.0)                              | 91,572 (54.0)  | 127,694 (55.9) |
| Former                                                | 25,820 (34.4)                              | 58,462 (34.5)  | 77,747 (34.0)  |
| Current <15 cigarettes/day                            | 2,585 (3.4)                                | 5,268 (3.1)    | 6,576 (2.9)    |
| Current ≥15 cigarettes/day                            | 3,713 (4.9)                                | 7,630 (4.5)    | 8,500 (3.7)    |
| Current, amount unknown                               | 2,808 (3.7)                                | 5,880 (3.5)    | 7,278 (3.2)    |
| Unknown                                               | 315 (0.4)                                  | 667 (0.4)      | 759 (0.3)      |
| Physical activity level, n (%)                        |                                            |                |                |
| High ≥ 50 excess METs                                 | 12,018 (16.0)                              | 26,068 (15.4)  | 37,328 (16.3)  |
| Moderate 10-<50 excess METs                           | 36,618 (48.8)                              | 82,371 (48.6)  | 111,398 (48.7) |
| Low <10 excess METs                                   | 23,401 (31.2)                              | 54,433 (32.1)  | 71,420 (31.2)  |
| Unknown                                               | 2,978 (4.0)                                | 6,607 (3.9)    | 8,408 (3.7)    |
| Alcohol intake, n (%)                                 |                                            |                |                |
| None drinkers                                         | 8,856 (11.8)                               | 12,094 (7.1)   | 16,943 (7.4)   |
| <1 g/day                                              | 10,017 (13.4)                              | 18,203 (10.7)  | 24,812 (10.9)  |
| 1-<10 g/day                                           | 23,631 (31.5)                              | 53,600 (31.6)  | 70,979 (31.1)  |
| 10-<20 g/day                                          | 14,675 (19.6)                              | 37,461 (22.1)  | 50,047 (21.9)  |
| ≥20 g/day                                             | 17,364 (23.1)                              | 47,270 (27.9)  | 64,681 (28.3)  |

|                                         |               |                |                |
|-----------------------------------------|---------------|----------------|----------------|
| Unknown                                 | 472 (0.6)     | 851 (0.5)      | 1,092 (0.5)    |
| <b>Diet</b>                             |               |                |                |
| Fruit & vegetable intake (servings/day) | 4.83 (2.97)   | 4.50 (2.43)    | 4.78 (2.60)    |
| Estimated cereal fibre intake (g/day)   | 4.64 (3.10)   | 4.51 (2.91)    | 4.46 (2.90)    |
| <b>Women's health</b>                   |               |                |                |
| Menopausal status, n (%)                |               |                |                |
| Premenopausal                           | 10,061 (24.0) | 18,217 (20.5)  | 32,444 (26.1)  |
| Postmenopausal                          | 29,715 (70.9) | 66,399 (74.7)  | 84,033 (67.6)  |
| Unknown                                 | 2,107 (5.0)   | 4,309 (4.8)    | 7,779 (6.3)    |
| Parity, n (%)                           |               |                |                |
| 0 births                                | 11,590 (27.7) | 16,043 (18.0)  | 19,914 (16.0)  |
| 1-2 births                              | 21,256 (50.8) | 51,261 (57.6)  | 72,995 (58.7)  |
| ≥3 births                               | 8,971 (21.4)  | 21,529 (24.2)  | 31,236 (25.1)  |
| Unknown                                 | 66 (0.2)      | 92 (0.1)       | 111 (0.1)      |
| Hormone replacement therapy use, n (%)  |               |                |                |
| Never                                   | 27,203 (64.9) | 53,290 (59.9)  | 77,474 (62.4)  |
| Past                                    | 12,072 (28.8) | 29,959 (33.7)  | 38,493 (31.0)  |
| Current                                 | 2,400 (5.7)   | 5,362 (6.0)    | 7,835 (6.3)    |
| Unknown                                 | 208 (0.5)     | 314 (0.4)      | 454 (0.4)      |
| Oral contraceptive pill use, n (%)      |               |                |                |
| Never                                   | 8,873 (21.2)  | 17,361 (19.5)  | 21,154 (17.0)  |
| Past                                    | 32,008 (76.4) | 69,798 (78.5)  | 100,203 (80.6) |
| Current                                 | 791 (1.9)     | 1,535 (1.7)    | 2,522 (2.0)    |
| Unknown                                 | 211 (0.5)     | 231 (0.3)      | 377 (0.3)      |
| <b>Men's health</b>                     |               |                |                |
| Enlarged prostate, n (%)                |               |                |                |
| No/unknown                              | 73,846 (98.4) | 166,698 (98.4) | 225,443 (98.6) |
| Yes                                     | 1,169 (1.6)   | 2,781 (1.6)    | 3,111 (1.4)    |
| <b>Skin cancer related factors</b>      |               |                |                |
| Skin colour, n (%)                      |               |                |                |
| Very fair                               | 6,377 (8.5)   | 12,392 (7.3)   | 17,251 (7.5)   |
| Fair                                    | 49,904 (66.5) | 115,766 (68.3) | 150,980 (66.1) |
| Light olive                             | 12,671 (16.9) | 30,887 (18.2)  | 43,342 (19.0)  |
| Dark olive                              | 1,257 (1.7)   | 3,040 (1.8)    | 4,486 (2.0)    |
| Brown/black                             | 3,474 (4.6)   | 4,959 (2.9)    | 9,567 (4.2)    |
| Unknown                                 | 1,332 (1.8)   | 2,435 (1.4)    | 2,928 (1.3)    |
| Hair colour, n (%)                      |               |                |                |
| Blonde                                  | 7,507 (10.0)  | 17,959 (10.6)  | 24,406 (10.7)  |
| Red                                     | 3,246 (4.3)   | 7,158 (4.2)    | 9,702 (4.2)    |
| Light brown                             | 28,120 (37.5) | 66,247 (39.1)  | 86,705 (37.9)  |
| Dark brown                              | 28,047 (37.4) | 62,722 (37.0)  | 85,216 (37.3)  |
| Black                                   | 6,869 (9.2)   | 12,802 (7.6)   | 19,573 (8.6)   |
| Other/unknown                           | 1,226 (1.6)   | 2,591 (1.5)    | 2,952 (1.3)    |
| Skin reaction, n (%)                    |               |                |                |
| Get very tanned                         | 15,488 (20.6) | 35,425 (20.9)  | 48,121 (21.1)  |
| Moderately tanning                      | 28,135 (37.5) | 66,483 (39.2)  | 87,512 (38.3)  |
| Mildly/occasionally tanning             | 15,314 (20.4) | 34,276 (20.2)  | 47,381 (20.7)  |
| Never tanning, only burning             | 12,980 (17.3) | 27,865 (16.4)  | 37,542 (16.4)  |
| Unknown                                 | 3,098 (4.1)   | 5,430 (3.2)    | 7,998 (3.5)    |
| UV protection use, n (%)                |               |                |                |
| Never/rarely                            | 10,276 (13.7) | 16,789 (9.9)   | 21,257 (9.3)   |
| Sometimes                               | 25,608 (34.1) | 58,323 (34.4)  | 72,617 (31.8)  |
| Most of the time                        | 24,025 (32.0) | 58,850 (34.7)  | 82,489 (36.1)  |
| Always                                  | 13,649 (18.2) | 33,127 (19.5)  | 48,700 (21.3)  |
| Do not go out in the sunshine           | 740 (1.0)     | 934 (0.6)      | 1,145 (0.5)    |
| Unknown                                 | 717 (1.0)     | 1,456 (0.9)    | 2,346 (1.0)    |
| Solarium use, n (%)                     |               |                |                |
| Never                                   | 67,682 (90.2) | 151,963 (89.7) | 200,645 (87.8) |
| >0-2 times/year                         | 3,918 (5.2)   | 9,402 (5.5)    | 13,516 (5.9)   |



|                                    |               |               |                |
|------------------------------------|---------------|---------------|----------------|
| ≥3 times/year                      | 1,902 (2.5)   | 5,202 (3.1)   | 9,975 (4.4)    |
| Unknown                            | 1,513 (2.0)   | 2,912 (1.7)   | 4,418 (1.9)    |
| Childhood sunburn, n (%)           |               |               |                |
| Never                              | 30,661 (40.9) | 69,542 (41.0) | 92,589 (40.5)  |
| Ever                               | 25,186 (33.6) | 56,949 (33.6) | 80,350 (35.2)  |
| Unknown                            | 19,168 (25.6) | 42,988 (25.4) | 55,615 (24.3)  |
| <b>Meat and fish intake*</b>       |               |               |                |
| Total meat, n (%)                  |               |               |                |
| <3 times/week (mean 33.7 g/day)    | 42,706 (56.9) | 15,263 (9.0)  | 0 (0.0)        |
| 3- <5 times/week (mean 84.7 g/day) | 15,015 (20.0) | 83,988 (49.6) | 20,279 (8.9)   |
| 5- <7 times/week (mean 99.2 g/day) | 11,134 (14.8) | 47,033 (27.8) | 95,521 (41.8)  |
| ≥7 times/week (mean 116.2 g/day)   | 5,242 (7.0)   | 20,965 (12.4) | 110,274 (48.2) |
| Unknown                            | 918 (1.2)     | 2,230 (1.3)   | 2,480 (1.1)    |
| Red & processed meat, n (%)        |               |               |                |
| ≤1 times/week (mean 10.5 g/day)    | 26,366 (35.1) | 7,141 (4.2)   | 10,462 (4.6)   |
| >1-<3 times/week (mean 48.7 g/day) | 23,492 (31.3) | 61,116 (36.1) | 75,362 (33.0)  |
| 3-<5 times/week (mean 65.0 g/day)  | 13,479 (18.0) | 56,697 (33.5) | 70,411 (30.8)  |
| ≥5 times/week (mean 79.3 g/day)    | 10,760 (14.3) | 42,295 (25.0) | 69,839 (30.6)  |
| Unknown                            | 918 (1.2)     | 2,230 (1.3)   | 2,480 (1.1)    |
| Red meat, n (%)                    |               |               |                |
| <1 times/week (mean 6.5 g/day)     | 26,997 (36.0) | 8,114 (4.8)   | 12,519 (5.5)   |
| 1-<2 times/week (mean 32.6 g/day)  | 28,816 (38.4) | 67,611 (39.9) | 88,055 (38.5)  |
| 2-<4 times/week (mean 45.1 g/day)  | 12,790 (17.0) | 72,910 (43.0) | 88,075 (38.5)  |
| ≥4 times/week (mean 55.1 g/day)    | 5,617 (7.5)   | 18,818 (11.1) | 37,632 (16.5)  |
| Unknown                            | 795 (1.1)     | 2,026 (1.2)   | 2,273 (1.0)    |
| Processed meat, n (%)              |               |               |                |
| 0 times/week (mean 4.1 g/day)      | 24,785 (33.0) | 7,763 (4.6)   | 11,432 (5.0)   |
| >0-<1 times/week (mean 15.6 g/day) | 21,752 (29.0) | 54,282 (32.0) | 67,332 (29.5)  |
| 1- <2 times/week (mean 21.3 g/day) | 12,658 (16.9) | 55,749 (32.9) | 69,462 (30.4)  |
| ≥2 times/week (mean 29.1 g/day)    | 15,652 (20.9) | 51,361 (30.3) | 79,965 (35.0)  |
| Unknown                            | 168 (0.2)     | 324 (0.2)     | 363 (0.2)      |

BMI, Body mass index; MET, metabolic equivalents.

\*Mean intakes are based on participants with re-measured 24-h dietary recall based on the WebQ.

†Mean (Standard deviation) unless otherwise specified.

**S4 Table. Hazard ratios and 95% confidence intervals of cancer incidence by site according to total meat intake in UK Biobank**

| Site (ICD-10)               | Model                | Total meat intake (times/week), (mean g/day) |                          |                          |                          | per 100 g higher intake  | P <sub>trend</sub> |
|-----------------------------|----------------------|----------------------------------------------|--------------------------|--------------------------|--------------------------|--------------------------|--------------------|
|                             |                      | <3 (33.7)                                    | 3-<5 (84.7)              | 5-<7 (99.2)              | ≥7 (116.2)               |                          |                    |
|                             | Total n              | 57969                                        | 119282                   | 153688                   | 136481                   | 467420                   |                    |
| Oral (C00-C14)              | Cases                | 54                                           | 129                      | 198                      | 169                      | 550                      |                    |
|                             | HR (95%-CI), Model 0 | 1.00 (Ref.)                                  | 1.05 (0.76, 1.44)        | 1.20 (0.89, 1.63)        | 1.07 (0.78, 1.45)        | 1.12 (0.78, 1.61)        | 0.5265             |
|                             | HR (95%-CI), Model 1 | 1.00 (Ref.)                                  | 1.05 (0.76, 1.45)        | 1.21 (0.89, 1.64)        | 0.99 (0.72, 1.35)        | 1.02 (0.71, 1.46)        | 0.9330             |
|                             | HR (95%-CI), Model 2 | 1.00 (Ref.)                                  | 1.08 (0.78, 1.49)        | 1.24 (0.91, 1.69)        | 1.02 (0.74, 1.41)        | 1.06 (0.74, 1.53)        | 0.7483             |
| Oesophagus (C15)            | Cases                | 48                                           | 125                      | 156                      | 196                      | 525                      |                    |
|                             | HR (95%-CI), Model 0 | 1.00 (Ref.)                                  | 1.01 (0.72, 1.41)        | 0.95 (0.69, 1.31)        | 1.26 (0.91, 1.73)        | 1.35 (0.91, 2.00)        | 0.1355             |
|                             | HR (95%-CI), Model 1 | 1.00 (Ref.)                                  | 1.01 (0.72, 1.42)        | 0.95 (0.68, 1.31)        | 1.18 (0.85, 1.64)        | 1.24 (0.84, 1.84)        | 0.2853             |
|                             | HR (95%-CI), Model 2 | 1.00 (Ref.)                                  | 0.99 (0.70, 1.38)        | 0.91 (0.65, 1.27)        | 1.12 (0.81, 1.56)        | 1.16 (0.78, 1.72)        | 0.4659             |
| Stomach (C16)               | Cases                | 31                                           | 86                       | 102                      | 129                      | 348                      |                    |
|                             | HR (95%-CI), Model 0 | 1.00 (Ref.)                                  | 1.06 (0.70, 1.61)        | 0.97 (0.65, 1.45)        | 1.31 (0.88, 1.95)        | 1.40 (0.86, 2.28)        | 0.1730             |
|                             | HR (95%-CI), Model 1 | 1.00 (Ref.)                                  | 1.09 (0.72, 1.65)        | 1.00 (0.66, 1.50)        | 1.30 (0.87, 1.95)        | 1.38 (0.85, 2.24)        | 0.1986             |
|                             | HR (95%-CI), Model 2 | 1.00 (Ref.)                                  | 1.07 (0.71, 1.62)        | 0.96 (0.64, 1.45)        | 1.25 (0.83, 1.87)        | 1.30 (0.80, 2.13)        | 0.2904             |
| Colorectum (C18-20)*        | Cases                | 283                                          | 816                      | 1076                     | 1019                     | 3194                     |                    |
|                             | HR (95%-CI), Model 0 | 1.00 (Ref.)                                  | <b>1.21 (1.06, 1.39)</b> | <b>1.26 (1.10, 1.43)</b> | <b>1.35 (1.18, 1.54)</b> | <b>1.42 (1.22, 1.67)</b> | <b>&lt;0.0001</b>  |
|                             | HR (95%-CI), Model 1 | 1.00 (Ref.)                                  | <b>1.17 (1.02, 1.35)</b> | <b>1.21 (1.06, 1.38)</b> | <b>1.27 (1.11, 1.46)</b> | <b>1.33 (1.14, 1.56)</b> | <b>0.0004</b>      |
|                             | HR (95%-CI), Model 2 | 1.00 (Ref.)                                  | <b>1.16 (1.01, 1.33)</b> | <b>1.18 (1.03, 1.35)</b> | <b>1.24 (1.08, 1.42)</b> | <b>1.28 (1.09, 1.51)</b> | <b>0.0022</b>      |
| Colon (C18)                 | Cases                | 188                                          | 557                      | 706                      | 660                      | 2111                     |                    |
|                             | HR (95%-CI), Model 0 | 1.00 (Ref.)                                  | <b>1.25 (1.06, 1.48)</b> | <b>1.27 (1.08, 1.49)</b> | <b>1.37 (1.16, 1.61)</b> | <b>1.43 (1.18, 1.74)</b> | <b>0.0002</b>      |
|                             | HR (95%-CI), Model 1 | 1.00 (Ref.)                                  | <b>1.22 (1.03, 1.44)</b> | <b>1.22 (1.04, 1.44)</b> | <b>1.30 (1.10, 1.54)</b> | <b>1.35 (1.11, 1.64)</b> | <b>0.0023</b>      |
|                             | HR (95%-CI), Model 2 | 1.00 (Ref.)                                  | <b>1.19 (1.01, 1.41)</b> | <b>1.18 (1.00, 1.40)</b> | <b>1.25 (1.06, 1.48)</b> | <b>1.28 (1.05, 1.56)</b> | <b>0.0128</b>      |
| Rectum (C19-20)             | Cases                | 98                                           | 267                      | 378                      | 362                      | 1105                     |                    |
|                             | HR (95%-CI), Model 0 | 1.00 (Ref.)                                  | 1.12 (0.89, 1.42)        | 1.22 (0.98, 1.53)        | <b>1.27 (1.02, 1.60)</b> | <b>1.37 (1.05, 1.78)</b> | <b>0.0210</b>      |
|                             | HR (95%-CI), Model 1 | 1.00 (Ref.)                                  | 1.08 (0.86, 1.37)        | 1.16 (0.92, 1.46)        | 1.19 (0.94, 1.49)        | 1.25 (0.95, 1.64)        | 0.1073             |
|                             | HR (95%-CI), Model 2 | 1.00 (Ref.)                                  | 1.08 (0.86, 1.37)        | 1.16 (0.92, 1.45)        | 1.18 (0.94, 1.49)        | 1.24 (0.95, 1.63)        | 0.1156             |
| Liver (C22)                 | Cases                | 36                                           | 69                       | 88                       | 106                      | 299                      |                    |
|                             | HR (95%-CI), Model 0 | 1.00 (Ref.)                                  | 0.78 (0.52, 1.17)        | 0.77 (0.52, 1.14)        | 1.03 (0.70, 1.51)        | 1.05 (0.64, 1.72)        | 0.8402             |
|                             | HR (95%-CI), Model 1 | 1.00 (Ref.)                                  | 0.84 (0.55, 1.26)        | 0.84 (0.57, 1.26)        | 1.10 (0.74, 1.62)        | 1.14 (0.70, 1.87)        | 0.5992             |
|                             | HR (95%-CI), Model 2 | 1.00 (Ref.)                                  | 0.82 (0.54, 1.24)        | 0.81 (0.54, 1.21)        | 1.03 (0.69, 1.53)        | 1.06 (0.64, 1.74)        | 0.8285             |
| Pancreas (C25)              | Cases                | 64                                           | 148                      | 221                      | 169                      | 602                      |                    |
|                             | HR (95%-CI), Model 0 | 1.00 (Ref.)                                  | 0.97 (0.72, 1.30)        | 1.16 (0.88, 1.54)        | 1.04 (0.78, 1.40)        | 1.13 (0.80, 1.59)        | 0.4984             |
|                             | HR (95%-CI), Model 1 | 1.00 (Ref.)                                  | 0.97 (0.72, 1.31)        | 1.17 (0.88, 1.55)        | 1.00 (0.74, 1.35)        | 1.07 (0.75, 1.51)        | 0.7090             |
|                             | HR (95%-CI), Model 2 | 1.00 (Ref.)                                  | 0.95 (0.71, 1.28)        | 1.13 (0.85, 1.50)        | 0.96 (0.71, 1.29)        | 1.01 (0.71, 1.44)        | 0.9503             |
| Lung (C34)                  | Cases                | 193                                          | 495                      | 630                      | 702                      | 2020                     |                    |
|                             | HR (95%-CI), Model 0 | 1.00 (Ref.)                                  | 1.05 (0.89, 1.25)        | 1.08 (0.91, 1.27)        | <b>1.39 (1.19, 1.64)</b> | <b>1.53 (1.26, 1.87)</b> | <b>&lt;0.0001</b>  |
|                             | HR (95%-CI), Model 1 | 1.00 (Ref.)                                  | 1.05 (0.89, 1.24)        | 1.06 (0.90, 1.25)        | <b>1.22 (1.03, 1.44)</b> | <b>1.28 (1.05, 1.56)</b> | <b>0.0134</b>      |
|                             | HR (95%-CI), Model 2 | 1.00 (Ref.)                                  | 1.07 (0.90, 1.26)        | 1.09 (0.92, 1.28)        | <b>1.25 (1.06, 1.48)</b> | <b>1.33 (1.09, 1.63)</b> | <b>0.0048</b>      |
| Lung (C34) in never smokers | Total n/cases        | 33531 / 37                                   | 66285 / 74               | 84646 / 75               | 71547 / 75               | 256009 / 261             |                    |
|                             | HR (95%-CI), Model 0 | 1.00 (Ref.)                                  | 0.90 (0.61, 1.34)        | 0.79 (0.53, 1.17)        | 1.03 (0.69, 1.54)        | 0.96 (0.59, 1.57)        | 0.8791             |
|                             | HR (95%-CI), Model 1 | 1.00 (Ref.)                                  | 0.92 (0.61, 1.37)        | 0.81 (0.54, 1.21)        | 1.04 (0.69, 1.56)        | 0.98 (0.59, 1.61)        | 0.9305             |

|                               |                      |             |                          |                          |                          |                          |               |
|-------------------------------|----------------------|-------------|--------------------------|--------------------------|--------------------------|--------------------------|---------------|
| Malignant melanoma (C43)      | HR (95%-CI), Model 2 | 1.00 (Ref.) | 0.93 (0.62, 1.39)        | 0.82 (0.55, 1.24)        | 1.08 (0.71, 1.62)        | 1.02 (0.61, 1.69)        | 0.9445        |
|                               | Cases                | 158         | 437                      | 547                      | 459                      | 1601                     |               |
|                               | HR (95%-CI), Model 0 | 1.00 (Ref.) | <b>1.24 (1.03, 1.49)</b> | <b>1.22 (1.02, 1.46)</b> | 1.18 (0.99, 1.42)        | 1.20 (0.97, 1.48)        | 0.0871        |
|                               | HR (95%-CI), Model 1 | 1.00 (Ref.) | 1.15 (0.96, 1.38)        | 1.12 (0.94, 1.34)        | 1.11 (0.92, 1.34)        | 1.11 (0.90, 1.38)        | 0.3339        |
|                               | HR (95%-CI), Model 2 | 1.00 (Ref.) | 1.13 (0.94, 1.36)        | 1.10 (0.92, 1.32)        | 1.08 (0.90, 1.31)        | 1.08 (0.87, 1.34)        | 0.4936        |
| Breast (C50) †                | HR (95%-CI), Model 3 | 1.00 (Ref.) | 1.12 (0.93, 1.35)        | 1.08 (0.90, 1.29)        | 1.06 (0.88, 1.28)        | 1.05 (0.85, 1.31)        | 0.6316        |
|                               | Total n/cases        | 39583 / 791 | 72017 / 1644             | 83799 / 1886             | 56869 / 1280             | 252268 / 5601            |               |
|                               | HR (95%-CI), Model 0 | 1.00 (Ref.) | <b>1.10 (1.01, 1.20)</b> | <b>1.10 (1.01, 1.20)</b> | <b>1.12 (1.02, 1.22)</b> | <b>1.14 (1.03, 1.27)</b> | <b>0.0113</b> |
|                               | HR (95%-CI), Model 1 | 1.00 (Ref.) | <b>1.09 (1.00, 1.19)</b> | <b>1.09 (1.00, 1.19)</b> | <b>1.11 (1.02, 1.22)</b> | <b>1.13 (1.02, 1.26)</b> | <b>0.0192</b> |
|                               | HR (95%-CI), Model 2 | 1.00 (Ref.) | 1.07 (0.98, 1.16)        | 1.05 (0.97, 1.15)        | 1.06 (0.97, 1.17)        | 1.07 (0.97, 1.20)        | 0.1876        |
| Endometrium (C54) †           | Total n/cases        | 39583 / 116 | 72017 / 257              | 83799 / 292              | 56869 / 190              | 252268 / 855             |               |
|                               | HR (95%-CI), Model 0 | 1.00 (Ref.) | 1.14 (0.91, 1.42)        | 1.15 (0.93, 1.43)        | 1.15 (0.91, 1.45)        | 1.19 (0.91, 1.56)        | 0.2011        |
|                               | HR (95%-CI), Model 1 | 1.00 (Ref.) | 1.24 (0.99, 1.55)        | <b>1.29 (1.03, 1.61)</b> | <b>1.29 (1.02, 1.64)</b> | <b>1.38 (1.05, 1.82)</b> | <b>0.0201</b> |
|                               | HR (95%-CI), Model 2 | 1.00 (Ref.) | 1.14 (0.91, 1.42)        | 1.11 (0.89, 1.39)        | 1.05 (0.83, 1.33)        | 1.07 (0.81, 1.41)        | 0.6249        |
|                               | Total n/cases        | 39583 / 99  | 72017 / 175              | 83799 / 168              | 56869 / 129              | 252268 / 571             |               |
| Ovary (C56) †                 | HR (95%-CI), Model 0 | 1.00 (Ref.) | 0.90 (0.71, 1.16)        | 0.76 (0.59, 0.98)        | 0.89 (0.68, 1.15)        | 0.79 (0.58, 1.08)        | 0.1415        |
|                               | HR (95%-CI), Model 1 | 1.00 (Ref.) | 0.93 (0.72, 1.20)        | 0.81 (0.62, 1.04)        | 0.95 (0.72, 1.24)        | 0.86 (0.63, 1.18)        | 0.3477        |
|                               | HR (95%-CI), Model 2 | 1.00 (Ref.) | 0.93 (0.72, 1.19)        | 0.80 (0.62, 1.03)        | 0.94 (0.72, 1.23)        | 0.85 (0.62, 1.17)        | 0.3287        |
|                               | Total n/cases        | 18386 / 447 | 47265 / 1454             | 69889 / 1919             | 79612 / 2055             | 215152 / 5875            |               |
|                               | HR (95%-CI), Model 0 | 1.00 (Ref.) | 1.11 (0.99, 1.23)        | 1.05 (0.95, 1.17)        | 1.09 (0.98, 1.20)        | 1.07 (0.95, 1.20)        | 0.2600        |
| Prostate (C61) ‡              | HR (95%-CI), Model 1 | 1.00 (Ref.) | 1.07 (0.96, 1.19)        | 1.01 (0.91, 1.12)        | 1.06 (0.95, 1.17)        | 1.04 (0.92, 1.17)        | 0.5089        |
|                               | HR (95%-CI), Model 2 | 1.00 (Ref.) | 1.07 (0.97, 1.20)        | 1.03 (0.92, 1.14)        | 1.08 (0.97, 1.19)        | 1.07 (0.95, 1.21)        | 0.2826        |
|                               | HR (95%-CI), Model 3 | 1.00 (Ref.) | 1.08 (0.97, 1.20)        | 1.02 (0.92, 1.14)        | 1.08 (0.97, 1.19)        | 1.07 (0.95, 1.20)        | 0.2935        |
|                               | Cases                | 72          | 198                      | 249                      | 255                      | 774                      |               |
|                               | HR (95%-CI), Model 0 | 1.00 (Ref.) | 1.12 (0.85, 1.47)        | 1.09 (0.84, 1.42)        | 1.22 (0.94, 1.59)        | 1.26 (0.92, 1.72)        | 0.1502        |
| Kidney (C64-65)               | HR (95%-CI), Model 1 | 1.00 (Ref.) | 1.12 (0.85, 1.47)        | 1.10 (0.84, 1.44)        | 1.23 (0.94, 1.61)        | 1.28 (0.93, 1.76)        | 0.1329        |
|                               | HR (95%-CI), Model 2 | 1.00 (Ref.) | 1.06 (0.81, 1.39)        | 1.01 (0.78, 1.33)        | 1.11 (0.84, 1.45)        | 1.11 (0.81, 1.53)        | 0.5112        |
|                               | Cases                | 55          | 154                      | 202                      | 212                      | 623                      |               |
|                               | HR (95%-CI), Model 0 | 1.00 (Ref.) | 1.04 (0.76, 1.41)        | 1.03 (0.76, 1.39)        | 1.15 (0.85, 1.55)        | 1.19 (0.84, 1.70)        | 0.3323        |
|                               | HR (95%-CI), Model 1 | 1.00 (Ref.) | 0.99 (0.72, 1.35)        | 0.97 (0.72, 1.32)        | 1.04 (0.77, 1.42)        | 1.06 (0.74, 1.52)        | 0.7477        |
| Bladder (C67)                 | HR (95%-CI), Model 2 | 1.00 (Ref.) | 0.97 (0.71, 1.32)        | 0.95 (0.70, 1.29)        | 1.01 (0.74, 1.37)        | 1.01 (0.70, 1.45)        | 0.9527        |
|                               | Cases                | 251         | 673                      | 824                      | 700                      | 2448                     |               |
|                               | HR (95%-CI), Model 0 | 1.00 (Ref.) | 1.13 (0.98, 1.31)        | 1.10 (0.95, 1.27)        | 1.06 (0.92, 1.23)        | 1.06 (0.89, 1.25)        | 0.5294        |
|                               | HR (95%-CI), Model 1 | 1.00 (Ref.) | 1.14 (0.98, 1.32)        | 1.11 (0.96, 1.28)        | 1.08 (0.93, 1.25)        | 1.08 (0.91, 1.28)        | 0.4007        |
|                               | HR (95%-CI), Model 2 | 1.00 (Ref.) | 1.14 (0.98, 1.32)        | 1.11 (0.96, 1.28)        | 1.07 (0.92, 1.25)        | 1.07 (0.90, 1.27)        | 0.4481        |
| Non-Hodgkin lymphoma (C82-85) | Cases                | 117         | 317                      | 407                      | 338                      | 1179                     |               |
|                               | HR (95%-CI), Model 0 | 1.00 (Ref.) | 1.15 (0.93, 1.42)        | 1.18 (0.96, 1.45)        | 1.13 (0.91, 1.39)        | 1.15 (0.90, 1.47)        | 0.2607        |
|                               | HR (95%-CI), Model 1 | 1.00 (Ref.) | 1.17 (0.94, 1.45)        | 1.20 (0.97, 1.48)        | 1.15 (0.93, 1.43)        | 1.18 (0.92, 1.52)        | 0.1894        |
|                               | HR (95%-CI), Model 2 | 1.00 (Ref.) | 1.16 (0.94, 1.44)        | 1.19 (0.97, 1.47)        | 1.14 (0.92, 1.42)        | 1.17 (0.91, 1.51)        | 0.2158        |
|                               | Cases                | 49          | 127                      | 141                      | 114                      | 431                      |               |
| Multiple myeloma (C90)        | HR (95%-CI), Model 0 | 1.00 (Ref.) | 1.10 (0.79, 1.53)        | 0.96 (0.70, 1.34)        | 0.90 (0.64, 1.27)        | 0.86 (0.58, 1.26)        | 0.4293        |
|                               | HR (95%-CI), Model 1 | 1.00 (Ref.) | 1.11 (0.80, 1.55)        | 0.98 (0.70, 1.36)        | 0.92 (0.65, 1.30)        | 0.87 (0.59, 1.30)        | 0.5000        |
|                               | HR (95%-CI), Model 2 | 1.00 (Ref.) | 1.11 (0.79, 1.55)        | 0.97 (0.70, 1.36)        | 0.91 (0.64, 1.29)        | 0.86 (0.58, 1.28)        | 0.4583        |
|                               | Cases                | 49          | 127                      | 141                      | 114                      | 431                      |               |

| Leukaemia (C91-C95) | Cases                | 78          | 195               | 233               | 205               | 711               |        |
|---------------------|----------------------|-------------|-------------------|-------------------|-------------------|-------------------|--------|
|                     | HR (95%-CI), Model 0 | 1.00 (Ref.) | 1.03 (0.79, 1.34) | 0.97 (0.75, 1.25) | 0.94 (0.72, 1.23) | 0.91 (0.67, 1.24) | 0.5625 |
|                     | HR (95%-CI), Model 1 | 1.00 (Ref.) | 1.01 (0.77, 1.31) | 0.95 (0.73, 1.23) | 0.93 (0.71, 1.22) | 0.90 (0.66, 1.23) | 0.5054 |
|                     | HR (95%-CI), Model 2 | 1.00 (Ref.) | 1.00 (0.77, 1.31) | 0.94 (0.73, 1.23) | 0.93 (0.71, 1.22) | 0.90 (0.65, 1.23) | 0.5076 |

Bold where p < 0.05. CI, Confidence interval; HR, Hazard ratio; LR, likelihood ratio test.

Model 0: Stratified for sex, age group and region and adjusted for age (underlying time variable), ethnicity (4 groups where possible: White, Asian or Asian British, Black or Black British, Mixed race or other, unknown).

Model 1: Model 0 + deprivation (Townsend index quintiles, unknown), qualification (college or university degree/vocational qualification, national examination at ages 17-18, national examination at age 16, other/unknown), employment (in paid employment, receiving pension, not in paid employment, unknown), living with a spouse or partner (yes, no, unknown), height (sex-specific quintiles, unknown), smoking (never, former, current <15 cigarettes/day, current ≥15 cigarettes/day, current unknown amount of cigarettes/day, unknown), physical activity (<10 excess metabolic equivalents, 10-<50 excess metabolic equivalents, ≥50 excess metabolic equivalents, unknown), alcohol intake (none, <1 g/day, 1-<10 g/day, 10-<20 g/day, ≥20 g/day, unknown), total fruit and vegetable intake (< 3 servings/day, 3-< 4 servings/day, 4-< 6 servings/day, ≥ 6 servings/day, unknown), estimated cereal fibre intake (sex-specific quintiles, unknown), in women: menopausal status (pre-, postmenopausal, unknown), parity (nulliparous, 1-2, ≥3, unknown), hormone-replacement therapy use (never, past, current, unknown) and oral contraceptive pill use (never, past, current, unknown).

Model 2: Model 1 + body mass index (sex-specific quintiles, unknown).

Model 3: For malignant melanoma: Model 2 + skin colour (very fair, fair, light olive, dark olive, brown/black, unknown), hair colour (blonde, red, light brown, dark brown, black, other/unknown), skin reaction (get very tanned, moderately tanning, mildly/occasionally tanning, never tanning only burning, unknown), UV protection use (never/rarely, sometimes, most of the time, always, do not go out in the sunshine, unknown), sunburns before age 15 (never, ever, unknown), solarium use (never, >0-2 times/year, ≥3 times/year, unknown); for prostate cancer: Model 2 + enlarged prostate (yes, no, unknown).

\* In 22 cases of colorectal cancer (C18/20) colon (C18) and rectal cancer (C19-20) diagnoses coincided.

† Analyses restricted to women.

‡ Analyses restricted to men.

**S5 Table. Hazard ratios and 95% confidence intervals of cancer incidence by site according to red and processed meat intake in UK Biobank**

| Site (ICD-10)               | Model                | Red and processed meat intake (times/week), (mean g/day) |                          |                          |                          | per 70 g higher intake   | P <sub>trend</sub> |
|-----------------------------|----------------------|----------------------------------------------------------|--------------------------|--------------------------|--------------------------|--------------------------|--------------------|
|                             |                      | ≤1 (10.5)                                                | >1-<3 (48.7)             | 3-<5 (65.0)              | ≥5 (79.3)                |                          |                    |
| Oral (C00-C14)              | Total n              | 44027                                                    | 160080                   | 140683                   | 122987                   | 467777                   |                    |
|                             | Cases                | 41                                                       | 168                      | 170                      | 171                      | 550                      |                    |
|                             | HR (95%-CI), Model 0 | 1.00 (Ref.)                                              | 1.02 (0.73, 1.44)        | 1.07 (0.76, 1.51)        | 1.12 (0.79, 1.58)        | 1.15 (0.83, 1.59)        | 0.4151             |
|                             | HR (95%-CI), Model 1 | 1.00 (Ref.)                                              | 1.04 (0.74, 1.48)        | 1.02 (0.72, 1.45)        | 0.97 (0.68, 1.38)        | 0.94 (0.68, 1.31)        | 0.7202             |
| Oesophagus (C15)            | HR (95%-CI), Model 2 | 1.00 (Ref.)                                              | 1.07 (0.76, 1.52)        | 1.06 (0.74, 1.50)        | 1.01 (0.70, 1.44)        | 0.98 (0.70, 1.36)        | 0.8807             |
|                             | Cases                | 32                                                       | 149                      | 158                      | 187                      | 526                      |                    |
|                             | HR (95%-CI), Model 0 | 1.00 (Ref.)                                              | 1.02 (0.70, 1.50)        | 1.07 (0.73, 1.56)        | 1.26 (0.86, 1.84)        | 1.35 (0.95, 1.93)        | 0.0939             |
|                             | HR (95%-CI), Model 1 | 1.00 (Ref.)                                              | 1.02 (0.69, 1.51)        | 1.02 (0.69, 1.51)        | 1.13 (0.76, 1.66)        | 1.16 (0.81, 1.65)        | 0.4257             |
| Stomach (C16)               | HR (95%-CI), Model 2 | 1.00 (Ref.)                                              | 0.99 (0.67, 1.46)        | 0.97 (0.66, 1.44)        | 1.06 (0.72, 1.57)        | 1.09 (0.76, 1.56)        | 0.6516             |
|                             | Cases                | 29                                                       | 90                       | 115                      | 114                      | 348                      |                    |
|                             | HR (95%-CI), Model 0 | 1.00 (Ref.)                                              | 0.67 (0.44, 1.02)        | 0.86 (0.57, 1.30)        | 0.87 (0.58, 1.32)        | 1.08 (0.71, 1.64)        | 0.7238             |
|                             | HR (95%-CI), Model 1 | 1.00 (Ref.)                                              | 0.70 (0.46, 1.07)        | 0.88 (0.58, 1.33)        | 0.85 (0.56, 1.30)        | 1.02 (0.66, 1.55)        | 0.9393             |
| Colorectum (C18-20)*        | HR (95%-CI), Model 2 | 1.00 (Ref.)                                              | 0.67 (0.44, 1.03)        | 0.84 (0.55, 1.28)        | 0.81 (0.53, 1.24)        | 0.96 (0.63, 1.48)        | 0.8673             |
|                             | Cases                | 197                                                      | 1002                     | 985                      | 1016                     | 3200                     |                    |
|                             | HR (95%-CI), Model 0 | 1.00 (Ref.)                                              | <b>1.21 (1.04, 1.41)</b> | <b>1.29 (1.10, 1.50)</b> | <b>1.44 (1.24, 1.68)</b> | <b>1.45 (1.26, 1.67)</b> | <b>&lt;0.0001</b>  |
|                             | HR (95%-CI), Model 1 | 1.00 (Ref.)                                              | <b>1.18 (1.01, 1.37)</b> | <b>1.23 (1.05, 1.44)</b> | <b>1.35 (1.15, 1.58)</b> | <b>1.36 (1.17, 1.57)</b> | <b>&lt;0.0001</b>  |
| Colon (C18)                 | HR (95%-CI), Model 2 | 1.00 (Ref.)                                              | 1.15 (0.99, 1.35)        | <b>1.20 (1.02, 1.40)</b> | <b>1.31 (1.12, 1.54)</b> | <b>1.31 (1.14, 1.52)</b> | <b>0.0002</b>      |
|                             | Cases                | 125                                                      | 674                      | 660                      | 655                      | 2114                     |                    |
|                             | HR (95%-CI), Model 0 | 1.00 (Ref.)                                              | <b>1.30 (1.07, 1.57)</b> | <b>1.41 (1.16, 1.71)</b> | <b>1.54 (1.27, 1.87)</b> | <b>1.53 (1.28, 1.82)</b> | <b>&lt;0.0001</b>  |
|                             | HR (95%-CI), Model 1 | 1.00 (Ref.)                                              | <b>1.27 (1.05, 1.54)</b> | <b>1.36 (1.12, 1.65)</b> | <b>1.47 (1.21, 1.79)</b> | <b>1.45 (1.21, 1.73)</b> | <b>&lt;0.0001</b>  |
| Rectum (C19-20)             | HR (95%-CI), Model 2 | 1.00 (Ref.)                                              | <b>1.24 (1.02, 1.51)</b> | <b>1.31 (1.08, 1.59)</b> | <b>1.41 (1.15, 1.72)</b> | <b>1.38 (1.16, 1.66)</b> | <b>0.0004</b>      |
|                             | Cases                | 73                                                       | 340                      | 327                      | 368                      | 1108                     |                    |
|                             | HR (95%-CI), Model 0 | 1.00 (Ref.)                                              | 1.09 (0.84, 1.40)        | 1.08 (0.84, 1.40)        | 1.28 (0.99, 1.65)        | <b>1.30 (1.03, 1.65)</b> | <b>0.0296</b>      |
|                             | HR (95%-CI), Model 1 | 1.00 (Ref.)                                              | 1.03 (0.80, 1.34)        | 1.01 (0.78, 1.30)        | 1.16 (0.89, 1.50)        | 1.18 (0.92, 1.50)        | 0.1937             |
| Liver (C22)                 | HR (95%-CI), Model 2 | 1.00 (Ref.)                                              | 1.03 (0.80, 1.33)        | 1.00 (0.77, 1.30)        | 1.15 (0.89, 1.50)        | 1.17 (0.92, 1.50)        | 0.2060             |
|                             | Cases                | 28                                                       | 86                       | 86                       | 99                       | 299                      |                    |
|                             | HR (95%-CI), Model 0 | 1.00 (Ref.)                                              | 0.71 (0.46, 1.09)        | 0.74 (0.48, 1.14)        | 0.90 (0.59, 1.39)        | 1.02 (0.65, 1.58)        | 0.9427             |
|                             | HR (95%-CI), Model 1 | 1.00 (Ref.)                                              | 0.79 (0.51, 1.23)        | 0.82 (0.52, 1.27)        | 0.97 (0.62, 1.51)        | 1.06 (0.68, 1.65)        | 0.8120             |
| Pancreas (C25)              | HR (95%-CI), Model 2 | 1.00 (Ref.)                                              | 0.77 (0.50, 1.20)        | 0.78 (0.50, 1.21)        | 0.91 (0.58, 1.42)        | 0.98 (0.63, 1.54)        | 0.9362             |
|                             | Cases                | 41                                                       | 197                      | 191                      | 175                      | 604                      |                    |
|                             | HR (95%-CI), Model 0 | 1.00 (Ref.)                                              | 1.15 (0.82, 1.61)        | 1.23 (0.88, 1.73)        | 1.26 (0.89, 1.78)        | 1.27 (0.93, 1.75)        | 0.1370             |
|                             | HR (95%-CI), Model 1 | 1.00 (Ref.)                                              | 1.15 (0.82, 1.62)        | 1.20 (0.85, 1.70)        | 1.17 (0.82, 1.66)        | 1.14 (0.83, 1.58)        | 0.4167             |
| Lung (C34)                  | HR (95%-CI), Model 2 | 1.00 (Ref.)                                              | 1.12 (0.80, 1.58)        | 1.16 (0.82, 1.64)        | 1.11 (0.78, 1.59)        | 1.09 (0.79, 1.51)        | 0.6087             |
|                             | Cases                | 108                                                      | 602                      | 608                      | 706                      | 2024                     |                    |
|                             | HR (95%-CI), Model 0 | 1.00 (Ref.)                                              | <b>1.32 (1.07, 1.61)</b> | <b>1.47 (1.20, 1.81)</b> | <b>1.86 (1.52, 2.28)</b> | <b>1.97 (1.64, 2.37)</b> | <b>&lt;0.0001</b>  |
|                             | HR (95%-CI), Model 1 | 1.00 (Ref.)                                              | <b>1.29 (1.05, 1.59)</b> | <b>1.31 (1.06, 1.61)</b> | <b>1.44 (1.17, 1.77)</b> | <b>1.37 (1.14, 1.65)</b> | <b>0.0008</b>      |
| Lung (C34) in never smokers | HR (95%-CI), Model 2 | 1.00 (Ref.)                                              | <b>1.32 (1.08, 1.63)</b> | <b>1.34 (1.09, 1.66)</b> | <b>1.49 (1.20, 1.83)</b> | <b>1.41 (1.17, 1.70)</b> | <b>0.0002</b>      |
|                             | Total n/cases        | 26348 / 25                                               | 90453 / 110              | 76690 / 64               | 62691 / 62               | 256182 / 261             |                    |
|                             | HR (95%-CI), Model 0 | 1.00 (Ref.)                                              | 1.14 (0.74, 1.77)        | 0.83 (0.52, 1.32)        | 1.00 (0.62, 1.60)        | 0.86 (0.55, 1.33)        | 0.4861             |
|                             | HR (95%-CI), Model 1 | 1.00 (Ref.)                                              | 1.17 (0.75, 1.83)        | 0.84 (0.52, 1.35)        | 1.00 (0.62, 1.62)        | 0.85 (0.54, 1.34)        | 0.4816             |

|                                              |                      |             |                          |                          |                          |                          |               |
|----------------------------------------------|----------------------|-------------|--------------------------|--------------------------|--------------------------|--------------------------|---------------|
| Malignant melanoma (C43)                     | HR (95%-CI), Model 2 | 1.00 (Ref.) | 1.18 (0.76, 1.85)        | 0.86 (0.53, 1.38)        | 1.03 (0.63, 1.68)        | 0.88 (0.56, 1.38)        | 0.5742        |
|                                              | Cases                | 98          | 553                      | 550                      | 400                      | 1601                     |               |
|                                              | HR (95%-CI), Model 0 | 1.00 (Ref.) | <b>1.43 (1.16, 1.78)</b> | <b>1.59 (1.28, 1.98)</b> | <b>1.31 (1.05, 1.64)</b> | <b>1.23 (1.01, 1.49)</b> | <b>0.0348</b> |
|                                              | HR (95%-CI), Model 1 | 1.00 (Ref.) | <b>1.31 (1.05, 1.63)</b> | <b>1.45 (1.16, 1.80)</b> | 1.21 (0.97, 1.52)        | 1.16 (0.95, 1.42)        | 0.1363        |
|                                              | HR (95%-CI), Model 2 | 1.00 (Ref.) | <b>1.29 (1.04, 1.60)</b> | <b>1.41 (1.13, 1.76)</b> | 1.18 (0.94, 1.49)        | 1.13 (0.93, 1.38)        | 0.2175        |
| Breast (C50) †                               | HR (95%-CI), Model 3 | 1.00 (Ref.) | <b>1.27 (1.03, 1.58)</b> | <b>1.40 (1.12, 1.74)</b> | 1.17 (0.93, 1.47)        | 1.12 (0.92, 1.37)        | 0.2536        |
|                                              | Total n/cases        | 31323 / 615 | 101755 / 2227            | 71684 / 1650             | 47660 / 1111             | 252422 / 5603            |               |
|                                              | HR (95%-CI), Model 0 | 1.00 (Ref.) | 1.08 (0.99, 1.18)        | <b>1.14 (1.03, 1.25)</b> | <b>1.14 (1.04, 1.26)</b> | <b>1.16 (1.05, 1.27)</b> | <b>0.0024</b> |
|                                              | HR (95%-CI), Model 1 | 1.00 (Ref.) | 1.06 (0.97, 1.16)        | <b>1.11 (1.01, 1.22)</b> | <b>1.12 (1.01, 1.24)</b> | <b>1.13 (1.03, 1.25)</b> | <b>0.0120</b> |
|                                              | HR (95%-CI), Model 2 | 1.00 (Ref.) | 1.04 (0.95, 1.13)        | 1.07 (0.97, 1.18)        | 1.07 (0.97, 1.19)        | 1.08 (0.98, 1.19)        | 0.1087        |
| Endometrium (C54) †                          | Total n/cases        | 31323 / 87  | 101755 / 353             | 71684 / 261              | 47660 / 155              | 252422 / 856             |               |
|                                              | HR (95%-CI), Model 0 | 1.00 (Ref.) | 1.16 (0.92, 1.47)        | 1.24 (0.97, 1.58)        | 1.09 (0.84, 1.42)        | 1.12 (0.88, 1.43)        | 0.3480        |
|                                              | HR (95%-CI), Model 1 | 1.00 (Ref.) | <b>1.29 (1.02, 1.64)</b> | <b>1.40 (1.09, 1.79)</b> | 1.24 (0.95, 1.63)        | 1.27 (0.99, 1.62)        | 0.0607        |
|                                              | HR (95%-CI), Model 2 | 1.00 (Ref.) | 1.18 (0.92, 1.50)        | 1.19 (0.93, 1.53)        | 1.02 (0.78, 1.34)        | 1.03 (0.80, 1.32)        | 0.8419        |
|                                              | Total n/cases        | 31323 / 75  | 101755 / 246             | 71684 / 145              | 47660 / 105              | 252422 / 571             |               |
| Ovary (C56) †                                | HR (95%-CI), Model 0 | 1.00 (Ref.) | 0.95 (0.73, 1.23)        | 0.79 (0.60, 1.05)        | 0.85 (0.63, 1.14)        | 0.79 (0.60, 1.05)        | 0.1057        |
|                                              | HR (95%-CI), Model 1 | 1.00 (Ref.) | 0.98 (0.76, 1.28)        | 0.84 (0.63, 1.12)        | 0.91 (0.67, 1.23)        | 0.85 (0.64, 1.14)        | 0.2790        |
|                                              | HR (95%-CI), Model 2 | 1.00 (Ref.) | 0.98 (0.75, 1.28)        | 0.84 (0.63, 1.11)        | 0.90 (0.66, 1.23)        | 0.85 (0.63, 1.14)        | 0.2663        |
|                                              | Total n/cases        | 12704 / 259 | 58325 / 1687             | 68999 / 1931             | 75327 / 2000             | 215355 / 5877            |               |
|                                              | HR (95%-CI), Model 0 | 1.00 (Ref.) | <b>1.22 (1.07, 1.39)</b> | <b>1.21 (1.06, 1.38)</b> | 1.16 (1.02, 1.32)        | 1.05 (0.94, 1.16)        | 0.3929        |
| Prostate (C61) ‡                             | HR (95%-CI), Model 1 | 1.00 (Ref.) | <b>1.17 (1.02, 1.33)</b> | <b>1.16 (1.02, 1.33)</b> | 1.12 (0.98, 1.28)        | 1.04 (0.93, 1.16)        | 0.4718        |
|                                              | HR (95%-CI), Model 2 | 1.00 (Ref.) | <b>1.18 (1.03, 1.34)</b> | <b>1.18 (1.03, 1.35)</b> | <b>1.15 (1.01, 1.31)</b> | 1.07 (0.96, 1.19)        | 0.2488        |
|                                              | HR (95%-CI), Model 3 | 1.00 (Ref.) | <b>1.18 (1.03, 1.34)</b> | <b>1.18 (1.03, 1.35)</b> | <b>1.15 (1.01, 1.31)</b> | 1.07 (0.96, 1.19)        | 0.2375        |
|                                              | Cases                | 50          | 243                      | 238                      | 245                      | 776                      |               |
|                                              | HR (95%-CI), Model 0 | 1.00 (Ref.) | 1.12 (0.83, 1.52)        | 1.15 (0.84, 1.56)        | 1.24 (0.91, 1.68)        | 1.24 (0.93, 1.64)        | 0.1424        |
| Kidney (C64-65)                              | HR (95%-CI), Model 1 | 1.00 (Ref.) | 1.11 (0.82, 1.52)        | 1.14 (0.83, 1.55)        | 1.23 (0.90, 1.69)        | 1.23 (0.92, 1.64)        | 0.1616        |
|                                              | HR (95%-CI), Model 2 | 1.00 (Ref.) | 1.04 (0.76, 1.42)        | 1.03 (0.76, 1.42)        | 1.09 (0.79, 1.50)        | 1.09 (0.81, 1.46)        | 0.5636        |
|                                              | Cases                | 31          | 190                      | 197                      | 205                      | 623                      |               |
|                                              | HR (95%-CI), Model 0 | 1.00 (Ref.) | 1.27 (0.87, 1.86)        | 1.28 (0.88, 1.88)        | 1.33 (0.91, 1.95)        | 1.25 (0.90, 1.73)        | 0.1796        |
|                                              | HR (95%-CI), Model 1 | 1.00 (Ref.) | 1.19 (0.81, 1.74)        | 1.15 (0.78, 1.70)        | 1.14 (0.77, 1.68)        | 1.05 (0.75, 1.46)        | 0.7756        |
| Bladder (C67)                                | HR (95%-CI), Model 2 | 1.00 (Ref.) | 1.16 (0.79, 1.70)        | 1.11 (0.76, 1.64)        | 1.09 (0.74, 1.61)        | 1.00 (0.72, 1.40)        | 0.9814        |
|                                              | Cases                | 191         | 837                      | 754                      | 669                      | 2451                     |               |
|                                              | HR (95%-CI), Model 0 | 1.00 (Ref.) | 1.05 (0.90, 1.23)        | 1.03 (0.87, 1.20)        | 0.99 (0.84, 1.17)        | 0.97 (0.83, 1.13)        | 0.7011        |
|                                              | HR (95%-CI), Model 1 | 1.00 (Ref.) | 1.05 (0.89, 1.23)        | 1.03 (0.87, 1.21)        | 1.00 (0.85, 1.18)        | 0.98 (0.84, 1.14)        | 0.7841        |
|                                              | HR (95%-CI), Model 2 | 1.00 (Ref.) | 1.04 (0.89, 1.22)        | 1.02 (0.87, 1.21)        | 0.99 (0.84, 1.17)        | 0.97 (0.83, 1.14)        | 0.7151        |
| Lymphatic and hematopoietic tissues (C81-96) | Cases                | 95          | 388                      | 361                      | 337                      | 1181                     |               |
|                                              | HR (95%-CI), Model 0 | 1.00 (Ref.) | 0.99 (0.79, 1.23)        | 1.01 (0.80, 1.27)        | 1.04 (0.83, 1.31)        | 1.06 (0.85, 1.32)        | 0.5906        |
|                                              | HR (95%-CI), Model 1 | 1.00 (Ref.) | 1.00 (0.79, 1.25)        | 1.02 (0.81, 1.29)        | 1.06 (0.83, 1.34)        | 1.07 (0.86, 1.35)        | 0.5333        |
|                                              | HR (95%-CI), Model 2 | 1.00 (Ref.) | 0.99 (0.79, 1.25)        | 1.01 (0.80, 1.28)        | 1.05 (0.82, 1.33)        | 1.06 (0.85, 1.34)        | 0.5874        |
|                                              | Cases                | 31          | 161                      | 134                      | 106                      | 432                      |               |
| Non-Hodgkin lymphoma (C82-85)                | HR (95%-CI), Model 0 | 1.00 (Ref.) | 1.26 (0.85, 1.85)        | 1.14 (0.77, 1.69)        | 1.00 (0.66, 1.50)        | 0.90 (0.63, 1.28)        | 0.5452        |
|                                              | HR (95%-CI), Model 1 | 1.00 (Ref.) | 1.27 (0.86, 1.88)        | 1.17 (0.79, 1.75)        | 1.03 (0.68, 1.56)        | 0.93 (0.64, 1.34)        | 0.6861        |
|                                              | HR (95%-CI), Model 2 | 1.00 (Ref.) | 1.27 (0.86, 1.87)        | 1.16 (0.78, 1.74)        | 1.02 (0.67, 1.54)        | 0.92 (0.63, 1.32)        | 0.6355        |
|                                              | Cases                | 31          | 161                      | 134                      | 106                      | 432                      |               |
|                                              | HR (95%-CI), Model 0 | 1.00 (Ref.) | 1.26 (0.85, 1.85)        | 1.14 (0.77, 1.69)        | 1.00 (0.66, 1.50)        | 0.90 (0.63, 1.28)        | 0.5452        |
| Multiple myeloma (C90)                       | HR (95%-CI), Model 1 | 1.00 (Ref.) | 1.27 (0.86, 1.88)        | 1.17 (0.79, 1.75)        | 1.03 (0.68, 1.56)        | 0.93 (0.64, 1.34)        | 0.6861        |
|                                              | HR (95%-CI), Model 2 | 1.00 (Ref.) | 1.27 (0.86, 1.87)        | 1.16 (0.78, 1.74)        | 1.02 (0.67, 1.54)        | 0.92 (0.63, 1.32)        | 0.6355        |

| Leukaemia (C91-C95) | Cases                | 57          | 245               | 219               | 190               | 711               |        |
|---------------------|----------------------|-------------|-------------------|-------------------|-------------------|-------------------|--------|
|                     | HR (95%-CI), Model 0 | 1.00 (Ref.) | 0.99 (0.74, 1.33) | 0.94 (0.70, 1.26) | 0.87 (0.64, 1.17) | 0.84 (0.64, 1.11) | 0.2181 |
|                     | HR (95%-CI), Model 1 | 1.00 (Ref.) | 0.95 (0.71, 1.27) | 0.90 (0.66, 1.21) | 0.83 (0.61, 1.13) | 0.81 (0.61, 1.08) | 0.1459 |
|                     | HR (95%-CI), Model 2 | 1.00 (Ref.) | 0.95 (0.71, 1.27) | 0.89 (0.66, 1.21) | 0.83 (0.61, 1.13) | 0.81 (0.60, 1.08) | 0.1460 |

Bold where p < 0.05. CI, Confidence interval; HR, Hazard ratio; LR, likelihood ratio test.

Model 0: Stratified for sex, age group and region and adjusted for age (underlying time variable), ethnicity (4 groups where possible: White, Asian or Asian British, Black or Black British, Mixed race or other, unknown).

Model 1: Model 0 + deprivation (Townsend index quintiles, unknown), qualification (college or university degree/vocational qualification, national examination at ages 17-18, national examination at age 16, other/unknown), employment (in paid employment, receiving pension, not in paid employment, unknown), living with a spouse or partner (yes, no, unknown), height (sex-specific quintiles, unknown), smoking (never, former, current <15 cigarettes/day, current ≥15 cigarettes/day, current unknown amount of cigarettes/day, unknown), physical activity (<10 excess metabolic equivalents, 10-<50 excess metabolic equivalents, ≥50 excess metabolic equivalents, unknown), alcohol intake (none, <1 g/day, 1-<10 g/day, 10-<20 g/day, ≥20 g/day, unknown), total fruit and vegetable intake (< 3 servings/day, 3-< 4 servings/day, 4-< 6 servings/day, ≥ 6 servings/day, unknown), estimated cereal fibre intake (sex-specific quintiles, unknown), in women: menopausal status (pre-, postmenopausal, unknown), parity (nulliparous, 1-2, ≥3, unknown), hormone-replacement therapy use (never, past, current, unknown) and oral contraceptive pill use (never, past, current, unknown).

Model 2: Model 1 + body mass index (sex-specific quintiles, unknown).

Model 3: For malignant melanoma: Model 2 + skin colour (very fair, fair, light olive, dark olive, brown/black, unknown), hair colour (blonde, red, light brown, dark brown, black, other/unknown), skin reaction (get very tanned, moderately tanning, mildly/occasionally tanning, never tanning only burning, unknown), UV protection use (never/rarely, sometimes, most of the time, always, do not go out in the sunshine, unknown), sunburns before age 15 (never, ever, unknown), solarium use (never, >0-2 times/year, ≥3 times/year, unknown); for prostate cancer: Model 2 + enlarged prostate (yes, no, unknown).

\* In 22 cases of colorectal cancer (C18/20) colon (C18) and rectal cancer (C19-20) diagnoses coincided.

† Analyses restricted to women.

‡ Analyses restricted to men.

**S6 Table. Hazard ratios and 95% confidence intervals of cancer incidence by site according to red meat intake in UK Biobank**

| Site (ICD-10)        | Model                | Red meat intake (times/week), (mean g/day) |                          |                          |                          | per 50 g higher intake   | P <sub>trend</sub> |
|----------------------|----------------------|--------------------------------------------|--------------------------|--------------------------|--------------------------|--------------------------|--------------------|
|                      |                      | <1 (6.5)                                   | 1-<2 (32.6)              | 2-<3 (45.1)              | ≥3 (55.1)                |                          |                    |
| Oral (C00-C14)       | Total n              | 47725                                      | 184629                   | 173889                   | 62121                    | 468364                   |                    |
|                      | Cases                | 53                                         | 195                      | 218                      | 84                       | 550                      |                    |
|                      | HR (95%-CI), Model 0 | 1.00 (Ref.)                                | 0.85 (0.62, 1.15)        | 0.95 (0.70, 1.28)        | 0.97 (0.69, 1.38)        | 1.05 (0.75, 1.46)        | 0.7928             |
|                      | HR (95%-CI), Model 1 | 1.00 (Ref.)                                | 0.85 (0.63, 1.16)        | 0.93 (0.68, 1.26)        | 0.87 (0.61, 1.24)        | 0.94 (0.67, 1.32)        | 0.7216             |
|                      | HR (95%-CI), Model 2 | 1.00 (Ref.)                                | 0.88 (0.64, 1.19)        | 0.96 (0.70, 1.30)        | 0.90 (0.63, 1.29)        | 0.97 (0.69, 1.36)        | 0.8714             |
| Oesophagus (C15)     | Cases                | 37                                         | 189                      | 221                      | 80                       | 527                      |                    |
|                      | HR (95%-CI), Model 0 | 1.00 (Ref.)                                | 1.03 (0.73, 1.47)        | 1.13 (0.80, 1.61)        | 1.07 (0.73, 1.59)        | 1.14 (0.80, 1.64)        | 0.4606             |
|                      | HR (95%-CI), Model 1 | 1.00 (Ref.)                                | 1.04 (0.73, 1.49)        | 1.13 (0.79, 1.61)        | 1.00 (0.67, 1.49)        | 1.06 (0.74, 1.52)        | 0.7473             |
|                      | HR (95%-CI), Model 2 | 1.00 (Ref.)                                | 1.01 (0.71, 1.44)        | 1.08 (0.75, 1.54)        | 0.94 (0.63, 1.41)        | 1.00 (0.70, 1.44)        | 0.9913             |
| Stomach (C16)        | Cases                | 28                                         | 117                      | 147                      | 58                       | 350                      |                    |
|                      | HR (95%-CI), Model 0 | 1.00 (Ref.)                                | 0.85 (0.56, 1.28)        | 1.01 (0.67, 1.52)        | 1.05 (0.66, 1.65)        | 1.20 (0.77, 1.87)        | 0.4244             |
|                      | HR (95%-CI), Model 1 | 1.00 (Ref.)                                | 0.89 (0.59, 1.36)        | 1.06 (0.70, 1.61)        | 1.05 (0.66, 1.67)        | 1.20 (0.77, 1.87)        | 0.4279             |
|                      | HR (95%-CI), Model 2 | 1.00 (Ref.)                                | 0.87 (0.57, 1.32)        | 1.02 (0.68, 1.55)        | 1.01 (0.63, 1.60)        | 1.14 (0.73, 1.79)        | 0.5601             |
| Colorectum (C18-20)* | Cases                | 228                                        | 1184                     | 1282                     | 507                      | 3201                     |                    |
|                      | HR (95%-CI), Model 0 | 1.00 (Ref.)                                | <b>1.16 (1.01, 1.34)</b> | <b>1.24 (1.07, 1.43)</b> | <b>1.34 (1.15, 1.57)</b> | <b>1.35 (1.16, 1.56)</b> | <b>0.0001</b>      |
|                      | HR (95%-CI), Model 1 | 1.00 (Ref.)                                | 1.12 (0.97, 1.29)        | <b>1.17 (1.02, 1.36)</b> | <b>1.26 (1.07, 1.48)</b> | <b>1.26 (1.08, 1.46)</b> | <b>0.0026</b>      |
|                      | HR (95%-CI), Model 2 | 1.00 (Ref.)                                | 1.10 (0.95, 1.27)        | 1.15 (0.99, 1.33)        | <b>1.22 (1.04, 1.44)</b> | <b>1.22 (1.05, 1.42)</b> | <b>0.0091</b>      |
| Colon (C18)          | Cases                | 142                                        | 780                      | 853                      | 339                      | 2114                     |                    |
|                      | HR (95%-CI), Model 0 | 1.00 (Ref.)                                | <b>1.25 (1.04, 1.49)</b> | <b>1.35 (1.13, 1.62)</b> | <b>1.48 (1.21, 1.80)</b> | <b>1.47 (1.23, 1.76)</b> | <b>&lt;0.0001</b>  |
|                      | HR (95%-CI), Model 1 | 1.00 (Ref.)                                | <b>1.22 (1.02, 1.46)</b> | <b>1.30 (1.09, 1.56)</b> | <b>1.41 (1.15, 1.72)</b> | <b>1.39 (1.16, 1.67)</b> | <b>0.0004</b>      |
|                      | HR (95%-CI), Model 2 | 1.00 (Ref.)                                | 1.19 (0.99, 1.43)        | <b>1.26 (1.05, 1.51)</b> | <b>1.35 (1.10, 1.65)</b> | <b>1.34 (1.11, 1.61)</b> | <b>0.0021</b>      |
| Rectum (C19-20)      | Cases                | 87                                         | 417                      | 435                      | 170                      | 1109                     |                    |
|                      | HR (95%-CI), Model 0 | 1.00 (Ref.)                                | 1.03 (0.82, 1.30)        | 1.05 (0.83, 1.33)        | 1.13 (0.87, 1.47)        | 1.12 (0.88, 1.43)        | 0.3559             |
|                      | HR (95%-CI), Model 1 | 1.00 (Ref.)                                | 0.98 (0.77, 1.23)        | 0.97 (0.77, 1.23)        | 1.02 (0.78, 1.33)        | 1.01 (0.79, 1.30)        | 0.9091             |
|                      | HR (95%-CI), Model 2 | 1.00 (Ref.)                                | 0.97 (0.77, 1.23)        | 0.97 (0.76, 1.23)        | 1.02 (0.78, 1.33)        | 1.01 (0.79, 1.30)        | 0.9380             |
| Liver (C22)          | Cases                | 25                                         | 106                      | 122                      | 48                       | 301                      |                    |
|                      | HR (95%-CI), Model 0 | 1.00 (Ref.)                                | 0.92 (0.59, 1.43)        | 1.03 (0.67, 1.58)        | 1.10 (0.68, 1.79)        | 1.18 (0.74, 1.88)        | 0.4985             |
|                      | HR (95%-CI), Model 1 | 1.00 (Ref.)                                | 1.05 (0.67, 1.63)        | 1.19 (0.76, 1.86)        | 1.21 (0.74, 1.99)        | 1.30 (0.81, 2.07)        | 0.2782             |
|                      | HR (95%-CI), Model 2 | 1.00 (Ref.)                                | 1.02 (0.66, 1.60)        | 1.15 (0.73, 1.80)        | 1.15 (0.70, 1.90)        | 1.23 (0.77, 1.97)        | 0.3945             |
| Pancreas (C25)       | Cases                | 46                                         | 224                      | 258                      | 76                       | 604                      |                    |
|                      | HR (95%-CI), Model 0 | 1.00 (Ref.)                                | 1.09 (0.79, 1.50)        | 1.25 (0.91, 1.72)        | 1.05 (0.72, 1.51)        | 1.18 (0.85, 1.64)        | 0.3281             |
|                      | HR (95%-CI), Model 1 | 1.00 (Ref.)                                | 1.09 (0.79, 1.51)        | 1.23 (0.89, 1.70)        | 0.98 (0.67, 1.43)        | 1.10 (0.79, 1.54)        | 0.5605             |
|                      | HR (95%-CI), Model 2 | 1.00 (Ref.)                                | 1.07 (0.77, 1.47)        | 1.19 (0.86, 1.65)        | 0.94 (0.65, 1.37)        | 1.06 (0.76, 1.48)        | 0.7446             |
| Lung (C34)           | Cases                | 137                                        | 720                      | 795                      | 375                      | 2027                     |                    |



|                             |                      |             |                          |                          |                          |                          |                   |
|-----------------------------|----------------------|-------------|--------------------------|--------------------------|--------------------------|--------------------------|-------------------|
|                             | HR (95%-CI), Model 0 | 1.00 (Ref.) | 1.18 (0.98, 1.41)        | <b>1.27 (1.05, 1.52)</b> | <b>1.59 (1.30, 1.93)</b> | <b>1.57 (1.31, 1.90)</b> | <b>&lt;0.0001</b> |
|                             | HR (95%-CI), Model 1 | 1.00 (Ref.) | 1.14 (0.95, 1.38)        | 1.17 (0.97, 1.41)        | <b>1.30 (1.06, 1.59)</b> | <b>1.27 (1.05, 1.53)</b> | <b>0.0124</b>     |
|                             | HR (95%-CI), Model 2 | 1.00 (Ref.) | 1.17 (0.97, 1.40)        | 1.20 (1.00, 1.44)        | <b>1.34 (1.09, 1.63)</b> | <b>1.30 (1.08, 1.57)</b> | <b>0.0055</b>     |
| Lung (C34) in never smokers | Total n/cases        | 28308 / 27  | 102391 / 112             | 93745 / 82               | 32101 / 41               | 256545 / 262             |                   |
|                             | HR (95%-CI), Model 0 | 1.00 (Ref.) | 1.06 (0.70, 1.62)        | 0.81 (0.52, 1.25)        | 1.15 (0.71, 1.88)        | 0.91 (0.57, 1.45)        | 0.6970            |
|                             | HR (95%-CI), Model 1 | 1.00 (Ref.) | 1.07 (0.70, 1.64)        | 0.82 (0.52, 1.28)        | 1.15 (0.70, 1.90)        | 0.92 (0.57, 1.48)        | 0.7302            |
|                             | HR (95%-CI), Model 2 | 1.00 (Ref.) | 1.08 (0.70, 1.66)        | 0.83 (0.53, 1.31)        | 1.18 (0.71, 1.95)        | 0.95 (0.58, 1.53)        | 0.8181            |
| Malignant melanoma (C43)    | Cases                | 107         | 657                      | 655                      | 185                      | 1604                     |                   |
|                             | HR (95%-CI), Model 0 | 1.00 (Ref.) | <b>1.47 (1.20, 1.80)</b> | <b>1.50 (1.22, 1.84)</b> | 1.19 (0.94, 1.52)        | 1.21 (0.99, 1.47)        | 0.0649            |
|                             | HR (95%-CI), Model 1 | 1.00 (Ref.) | <b>1.36 (1.10, 1.67)</b> | <b>1.36 (1.11, 1.68)</b> | 1.13 (0.88, 1.44)        | 1.13 (0.92, 1.38)        | 0.2563            |
|                             | HR (95%-CI), Model 2 | 1.00 (Ref.) | <b>1.34 (1.09, 1.64)</b> | <b>1.33 (1.08, 1.64)</b> | 1.10 (0.86, 1.40)        | 1.10 (0.89, 1.35)        | 0.3683            |
|                             | HR (95%-CI), Model 3 | 1.00 (Ref.) | <b>1.32 (1.07, 1.62)</b> | <b>1.31 (1.07, 1.62)</b> | 1.09 (0.85, 1.39)        | 1.09 (0.88, 1.34)        | 0.4366            |
| Breast (C50) †              | Total n/cases        | 31964 / 632 | 103136 / 2207            | 88315 / 2063             | 29330 / 710              | 252745 / 5612            |                   |
|                             | HR (95%-CI), Model 0 | 1.00 (Ref.) | 1.05 (0.96, 1.15)        | <b>1.13 (1.03, 1.23)</b> | <b>1.16 (1.04, 1.30)</b> | <b>1.19 (1.07, 1.31)</b> | <b>0.0008</b>     |
|                             | HR (95%-CI), Model 1 | 1.00 (Ref.) | 1.04 (0.95, 1.13)        | <b>1.10 (1.01, 1.21)</b> | <b>1.15 (1.03, 1.28)</b> | <b>1.17 (1.05, 1.29)</b> | <b>0.0033</b>     |
|                             | HR (95%-CI), Model 2 | 1.00 (Ref.) | 1.01 (0.93, 1.11)        | 1.07 (0.98, 1.17)        | 1.11 (0.99, 1.23)        | <b>1.12 (1.01, 1.24)</b> | <b>0.0299</b>     |
| Endometrium (C54) †         | Total n/cases        | 31964 / 89  | 103136 / 347             | 88315 / 327              | 29330 / 93               | 252745 / 856             |                   |
|                             | HR (95%-CI), Model 0 | 1.00 (Ref.) | 1.13 (0.90, 1.43)        | 1.20 (0.95, 1.52)        | 1.02 (0.76, 1.37)        | 1.11 (0.86, 1.44)        | 0.4074            |
|                             | HR (95%-CI), Model 1 | 1.00 (Ref.) | 1.24 (0.98, 1.58)        | <b>1.37 (1.08, 1.75)</b> | 1.17 (0.87, 1.57)        | 1.29 (1.00, 1.68)        | 0.0545            |
|                             | HR (95%-CI), Model 2 | 1.00 (Ref.) | 1.13 (0.89, 1.44)        | 1.19 (0.93, 1.52)        | 0.99 (0.73, 1.33)        | 1.08 (0.83, 1.40)        | 0.5739            |
| Ovary (C56) †               | Total n/cases        | 31964 / 84  | 103136 / 234             | 88315 / 182              | 29330 / 73               | 252745 / 573             |                   |
|                             | HR (95%-CI), Model 0 | 1.00 (Ref.) | 0.81 (0.63, 1.04)        | <b>0.71 (0.55, 0.92)</b> | 0.85 (0.62, 1.16)        | <b>0.74 (0.55, 0.99)</b> | <b>0.0461</b>     |
|                             | HR (95%-CI), Model 1 | 1.00 (Ref.) | 0.83 (0.65, 1.07)        | <b>0.75 (0.57, 0.98)</b> | 0.90 (0.65, 1.24)        | 0.80 (0.59, 1.08)        | 0.1441            |
|                             | HR (95%-CI), Model 2 | 1.00 (Ref.) | 0.83 (0.64, 1.07)        | <b>0.75 (0.57, 0.97)</b> | 0.90 (0.65, 1.24)        | 0.79 (0.58, 1.08)        | 0.1346            |
| Prostate (C61) ‡            | Cases                | 15761 / 294 | 81493 / 2213             | 85574 / 2495             | 32791 / 884              | 215619 / 5886            |                   |
|                             | HR (95%-CI), Model 0 | 1.00 (Ref.) | <b>1.29 (1.14, 1.46)</b> | <b>1.31 (1.16, 1.48)</b> | <b>1.23 (1.08, 1.40)</b> | <b>1.16 (1.04, 1.30)</b> | <b>0.0087</b>     |
|                             | HR (95%-CI), Model 1 | 1.00 (Ref.) | <b>1.23 (1.09, 1.39)</b> | <b>1.25 (1.11, 1.42)</b> | <b>1.18 (1.03, 1.35)</b> | <b>1.13 (1.01, 1.26)</b> | <b>0.0396</b>     |
|                             | HR (95%-CI), Model 2 | 1.00 (Ref.) | <b>1.25 (1.10, 1.41)</b> | <b>1.27 (1.13, 1.44)</b> | <b>1.21 (1.05, 1.38)</b> | <b>1.15 (1.03, 1.29)</b> | <b>0.0151</b>     |
|                             | HR (95%-CI), Model 3 | 1.00 (Ref.) | <b>1.25 (1.10, 1.41)</b> | <b>1.28 (1.13, 1.44)</b> | <b>1.21 (1.06, 1.38)</b> | <b>1.16 (1.03, 1.30)</b> | <b>0.0134</b>     |
| Kidney (C64-65)             | Cases                | 60          | 283                      | 315                      | 118                      | 776                      |                   |
|                             | HR (95%-CI), Model 0 | 1.00 (Ref.) | 1.02 (0.77, 1.35)        | 1.10 (0.83, 1.45)        | 1.12 (0.82, 1.53)        | 1.17 (0.87, 1.56)        | 0.3004            |
|                             | HR (95%-CI), Model 1 | 1.00 (Ref.) | 1.02 (0.77, 1.35)        | 1.12 (0.84, 1.48)        | 1.13 (0.82, 1.55)        | 1.19 (0.89, 1.61)        | 0.2449            |
|                             | HR (95%-CI), Model 2 | 1.00 (Ref.) | 0.95 (0.72, 1.27)        | 1.03 (0.77, 1.36)        | 1.01 (0.74, 1.40)        | 1.07 (0.79, 1.45)        | 0.6513            |
| Bladder (C67)               | Cases                | 37          | 238                      | 252                      | 99                       | 626                      |                   |
|                             | HR (95%-CI), Model 0 | 1.00 (Ref.) | 1.23 (0.87, 1.74)        | 1.22 (0.86, 1.73)        | 1.31 (0.90, 1.92)        | 1.23 (0.88, 1.72)        | 0.2302            |
|                             | HR (95%-CI), Model 1 | 1.00 (Ref.) | 1.16 (0.82, 1.65)        | 1.13 (0.80, 1.61)        | 1.17 (0.79, 1.72)        | 1.10 (0.78, 1.55)        | 0.5776            |
|                             | HR (95%-CI), Model 2 | 1.00 (Ref.) | 1.13 (0.80, 1.61)        | 1.10 (0.77, 1.56)        | 1.12 (0.76, 1.65)        | 1.06 (0.75, 1.49)        | 0.7464            |
| Lymphatic and hematopoietic | Cases                | 215         | 922                      | 989                      | 327                      | 2453                     |                   |

|                               |                      |             |                   |                   |                   |                   |        |
|-------------------------------|----------------------|-------------|-------------------|-------------------|-------------------|-------------------|--------|
| tissues (C81-96)              | HR (95%-CI), Model 0 | 1.00 (Ref.) | 0.97 (0.83, 1.12) | 1.03 (0.89, 1.19) | 0.95 (0.80, 1.13) | 1.01 (0.86, 1.19) | 0.8993 |
|                               | HR (95%-CI), Model 1 | 1.00 (Ref.) | 0.97 (0.83, 1.12) | 1.04 (0.90, 1.21) | 0.96 (0.81, 1.15) | 1.03 (0.87, 1.21) | 0.7272 |
|                               | HR (95%-CI), Model 2 | 1.00 (Ref.) | 0.96 (0.83, 1.12) | 1.04 (0.89, 1.21) | 0.95 (0.80, 1.14) | 1.02 (0.87, 1.20) | 0.7888 |
| Non-Hodgkin lymphoma (C82-85) | Cases                | 99          | 435               | 483               | 165               | 1182              |        |
|                               | HR (95%-CI), Model 0 | 1.00 (Ref.) | 1.00 (0.80, 1.24) | 1.11 (0.89, 1.38) | 1.06 (0.83, 1.37) | 1.14 (0.91, 1.44) | 0.2594 |
|                               | HR (95%-CI), Model 1 | 1.00 (Ref.) | 1.01 (0.81, 1.27) | 1.13 (0.91, 1.41) | 1.09 (0.84, 1.41) | 1.17 (0.92, 1.49) | 0.1914 |
|                               | HR (95%-CI), Model 2 | 1.00 (Ref.) | 1.01 (0.81, 1.26) | 1.13 (0.90, 1.41) | 1.08 (0.84, 1.40) | 1.16 (0.92, 1.48) | 0.2158 |
| Multiple myeloma (C90)        | Cases                | 35          | 185               | 163               | 49                | 432               |        |
|                               | HR (95%-CI), Model 0 | 1.00 (Ref.) | 1.20 (0.84, 1.73) | 1.06 (0.73, 1.53) | 0.90 (0.58, 1.40) | 0.87 (0.60, 1.26) | 0.4495 |
|                               | HR (95%-CI), Model 1 | 1.00 (Ref.) | 1.21 (0.84, 1.74) | 1.08 (0.74, 1.57) | 0.91 (0.58, 1.41) | 0.88 (0.60, 1.28) | 0.5031 |
|                               | HR (95%-CI), Model 2 | 1.00 (Ref.) | 1.20 (0.83, 1.74) | 1.07 (0.74, 1.56) | 0.90 (0.57, 1.40) | 0.87 (0.59, 1.27) | 0.4678 |
| Leukaemia (C91-C95)           | Cases                | 71          | 256               | 291               | 94                | 712               |        |
|                               | HR (95%-CI), Model 0 | 1.00 (Ref.) | 0.78 (0.60, 1.02) | 0.87 (0.67, 1.13) | 0.77 (0.56, 1.05) | 0.86 (0.64, 1.15) | 0.3141 |
|                               | HR (95%-CI), Model 1 | 1.00 (Ref.) | 0.76 (0.58, 0.99) | 0.85 (0.65, 1.11) | 0.76 (0.55, 1.04) | 0.85 (0.63, 1.15) | 0.3052 |
|                               | HR (95%-CI), Model 2 | 1.00 (Ref.) | 0.75 (0.58, 0.98) | 0.85 (0.65, 1.11) | 0.76 (0.55, 1.04) | 0.85 (0.63, 1.15) | 0.3019 |

Bold where  $p < 0.05$ . CI, Confidence interval; HR, Hazard ratio; LR, likelihood ratio test.

Model 0: Stratified for sex, age group and region and adjusted for age (underlying time variable), ethnicity (4 groups where possible: White, Asian or Asian British, Black or Black British, Mixed race or other, unknown).

Model 1: Model 0 + deprivation (Townsend index quintiles, unknown), qualification (college or university degree/vocational qualification, national examination at ages 17-18, national examination at age 16, other/unknown), employment (in paid employment, receiving pension, not in paid employment, unknown), living with a spouse or partner (yes, no, unknown), height (sex-specific quintiles, unknown), smoking (never, former, current  $< 15$  cigarettes/day, current  $\geq 15$  cigarettes/day, current unknown amount of cigarettes/day, unknown), physical activity ( $< 10$  excess metabolic equivalents,  $10 < 50$  excess metabolic equivalents,  $\geq 50$  excess metabolic equivalents, unknown), alcohol intake (none,  $< 1$  g/day,  $1 < 10$  g/day,  $10 < 20$  g/day,  $\geq 20$  g/day, unknown), total fruit and vegetable intake ( $< 3$  servings/day,  $3 < 4$  servings/day,  $4 < 6$  servings/day,  $\geq 6$  servings/day, unknown), estimated cereal fibre intake (sex-specific quintiles, unknown), in women: menopausal status (pre-, postmenopausal, unknown), parity (nulliparous, 1-2,  $\geq 3$ , unknown), hormone-replacement therapy use (never, past, current, unknown) and oral contraceptive pill use (never, past, current, unknown).

Model 2: Model 1 + body mass index (sex-specific quintiles, unknown).

Model 3: For malignant melanoma: Model 2 + skin colour (very fair, fair, light olive, dark olive, brown/black, unknown), hair colour (blonde, red, light brown, dark brown, black, other/unknown), skin reaction (get very tanned, moderately tanning, mildly/occasionally tanning, never tanning only burning, unknown), UV protection use (never/rarely, sometimes, most of the time, always, do not go out in the sunshine, unknown), sunburns before age 15 (never, ever, unknown), solarium use (never,  $> 0-2$  times/year,  $\geq 3$  times/year, unknown); for prostate cancer: Model 2 + enlarged prostate (yes, no, unknown).

\* In 22 cases of colorectal cancer (C18/20) colon (C18) and rectal cancer (C19-20) diagnoses coincided.

† Analyses restricted to women.

‡ Analyses restricted to men.

**S7 Table. Hazard ratios and 95% confidence intervals of cancer incidence by site according to processed meat intake in UK Biobank**

| Site (ICD-10)        | Model                | Processed meat intake (times/week), (mean g/day) |                          |                          |                          | per 20 g higher intake   | P <sub>trend</sub> |
|----------------------|----------------------|--------------------------------------------------|--------------------------|--------------------------|--------------------------|--------------------------|--------------------|
|                      |                      | 0 (4.1)                                          | >0-<1 (15.6)             | 1-<2 (21.3)              | ≥2 (29.1)                |                          |                    |
| Oral (C00-C14)       | Total n              | 44046                                            | 143524                   | 138083                   | 147228                   | 472881                   |                    |
|                      | Cases                | 48                                               | 128                      | 177                      | 205                      | 558                      |                    |
|                      | HR (95%-CI), Model 0 | 1.00 (Ref.)                                      | 0.76 (0.55, 1.06)        | 0.98 (0.71, 1.36)        | 0.96 (0.70, 1.33)        | 1.11 (0.87, 1.41)        | 0.4054             |
|                      | HR (95%-CI), Model 1 | 1.00 (Ref.)                                      | 0.77 (0.55, 1.08)        | 0.96 (0.69, 1.33)        | 0.83 (0.59, 1.15)        | 0.93 (0.73, 1.19)        | 0.5650             |
|                      | HR (95%-CI), Model 2 | 1.00 (Ref.)                                      | 0.79 (0.57, 1.11)        | 0.99 (0.71, 1.38)        | 0.86 (0.61, 1.19)        | 0.95 (0.75, 1.21)        | 0.6892             |
| Oesophagus (C15)     | Cases                | 35                                               | 128                      | 152                      | 219                      | 534                      |                    |
|                      | HR (95%-CI), Model 0 | 1.00 (Ref.)                                      | 0.95 (0.65, 1.37)        | 0.99 (0.68, 1.43)        | 1.18 (0.82, 1.70)        | 1.25 (0.97, 1.61)        | 0.0791             |
|                      | HR (95%-CI), Model 1 | 1.00 (Ref.)                                      | 0.93 (0.64, 1.36)        | 0.93 (0.64, 1.36)        | 1.02 (0.70, 1.48)        | 1.08 (0.83, 1.39)        | 0.5729             |
|                      | HR (95%-CI), Model 2 | 1.00 (Ref.)                                      | 0.90 (0.62, 1.32)        | 0.89 (0.61, 1.30)        | 0.97 (0.66, 1.40)        | 1.03 (0.80, 1.34)        | 0.7947             |
| Stomach (C16)        | Cases                | 28                                               | 86                       | 105                      | 134                      | 353                      |                    |
|                      | HR (95%-CI), Model 0 | 1.00 (Ref.)                                      | 0.78 (0.51, 1.20)        | 0.86 (0.56, 1.31)        | 0.94 (0.62, 1.42)        | 1.08 (0.79, 1.46)        | 0.6376             |
|                      | HR (95%-CI), Model 1 | 1.00 (Ref.)                                      | 0.81 (0.53, 1.25)        | 0.86 (0.56, 1.33)        | 0.89 (0.58, 1.37)        | 1.00 (0.73, 1.36)        | 0.9995             |
|                      | HR (95%-CI), Model 2 | 1.00 (Ref.)                                      | 0.79 (0.51, 1.22)        | 0.83 (0.54, 1.28)        | 0.86 (0.56, 1.31)        | 0.97 (0.71, 1.32)        | 0.8474             |
| Colorectum (C18-20)* | Cases                | 211                                              | 905                      | 963                      | 1149                     | 3228                     |                    |
|                      | HR (95%-CI), Model 0 | 1.00 (Ref.)                                      | <b>1.19 (1.02, 1.38)</b> | <b>1.25 (1.07, 1.45)</b> | <b>1.36 (1.17, 1.58)</b> | <b>1.25 (1.13, 1.39)</b> | <b>&lt;0.0001</b>  |
|                      | HR (95%-CI), Model 1 | 1.00 (Ref.)                                      | 1.15 (0.99, 1.34)        | <b>1.20 (1.03, 1.40)</b> | <b>1.28 (1.10, 1.50)</b> | <b>1.20 (1.08, 1.33)</b> | <b>0.0006</b>      |
|                      | HR (95%-CI), Model 2 | 1.00 (Ref.)                                      | 1.13 (0.97, 1.32)        | <b>1.17 (1.00, 1.36)</b> | <b>1.25 (1.07, 1.46)</b> | <b>1.18 (1.06, 1.31)</b> | <b>0.0022</b>      |
| Colon (C18)          | Cases                | 145                                              | 621                      | 649                      | 719                      | 2134                     |                    |
|                      | HR (95%-CI), Model 0 | 1.00 (Ref.)                                      | 1.20 (1.00, 1.43)        | <b>1.27 (1.06, 1.52)</b> | <b>1.32 (1.10, 1.58)</b> | <b>1.21 (1.07, 1.37)</b> | <b>0.0025</b>      |
|                      | HR (95%-CI), Model 1 | 1.00 (Ref.)                                      | 1.17 (0.97, 1.40)        | <b>1.22 (1.02, 1.47)</b> | <b>1.26 (1.05, 1.52)</b> | <b>1.17 (1.03, 1.32)</b> | <b>0.0167</b>      |
|                      | HR (95%-CI), Model 2 | 1.00 (Ref.)                                      | 1.14 (0.95, 1.37)        | 1.18 (0.98, 1.42)        | <b>1.21 (1.00, 1.46)</b> | 1.13 (1.00, 1.29)        | 0.0575             |
| Rectum (C19-20)      | Cases                | 68                                               | 289                      | 322                      | 437                      | 1116                     |                    |
|                      | HR (95%-CI), Model 0 | 1.00 (Ref.)                                      | 1.16 (0.89, 1.51)        | 1.21 (0.93, 1.57)        | <b>1.42 (1.10, 1.85)</b> | <b>1.34 (1.13, 1.60)</b> | <b>0.0009</b>      |
|                      | HR (95%-CI), Model 1 | 1.00 (Ref.)                                      | 1.11 (0.85, 1.45)        | 1.14 (0.87, 1.49)        | <b>1.31 (1.00, 1.71)</b> | <b>1.26 (1.06, 1.51)</b> | <b>0.0104</b>      |
|                      | HR (95%-CI), Model 2 | 1.00 (Ref.)                                      | 1.11 (0.85, 1.45)        | 1.14 (0.87, 1.49)        | <b>1.31 (1.00, 1.71)</b> | <b>1.26 (1.06, 1.51)</b> | <b>0.0106</b>      |
| Liver (C22)          | Cases                | 27                                               | 85                       | 76                       | 114                      | 302                      |                    |
|                      | HR (95%-CI), Model 0 | 1.00 (Ref.)                                      | 0.86 (0.55, 1.32)        | 0.72 (0.46, 1.13)        | 0.96 (0.62, 1.47)        | 1.03 (0.75, 1.43)        | 0.8388             |
|                      | HR (95%-CI), Model 1 | 1.00 (Ref.)                                      | 0.96 (0.61, 1.49)        | 0.80 (0.50, 1.26)        | 1.01 (0.65, 1.58)        | 1.04 (0.75, 1.44)        | 0.8205             |
|                      | HR (95%-CI), Model 2 | 1.00 (Ref.)                                      | 0.93 (0.60, 1.45)        | 0.76 (0.48, 1.21)        | 0.95 (0.61, 1.49)        | 0.99 (0.71, 1.38)        | 0.9467             |
| Pancreas (C25)       | Cases                | 43                                               | 189                      | 166                      | 210                      | 608                      |                    |
|                      | HR (95%-CI), Model 0 | 1.00 (Ref.)                                      | 1.23 (0.89, 1.72)        | 1.09 (0.78, 1.53)        | 1.30 (0.93, 1.82)        | 1.17 (0.93, 1.47)        | 0.1823             |
|                      | HR (95%-CI), Model 1 | 1.00 (Ref.)                                      | 1.22 (0.87, 1.71)        | 1.06 (0.75, 1.49)        | 1.19 (0.84, 1.67)        | 1.07 (0.84, 1.35)        | 0.5953             |
|                      | HR (95%-CI), Model 2 | 1.00 (Ref.)                                      | 1.19 (0.85, 1.67)        | 1.02 (0.72, 1.44)        | 1.14 (0.80, 1.60)        | 1.03 (0.81, 1.31)        | 0.7995             |
| Lung (C34)           | Cases                | 143                                              | 514                      | 593                      | 817                      | 2067                     |                    |

|                             |                      |             |                          |                          |                          |                          |                   |
|-----------------------------|----------------------|-------------|--------------------------|--------------------------|--------------------------|--------------------------|-------------------|
|                             | HR (95%-CI), Model 0 | 1.00 (Ref.) | 0.99 (0.83, 1.20)        | 1.17 (0.98, 1.41)        | 1.55 (1.29, 1.86)        | <b>1.63 (1.43, 1.85)</b> | <b>&lt;0.0001</b> |
|                             | HR (95%-CI), Model 1 | 1.00 (Ref.) | 0.97 (0.80, 1.17)        | 1.04 (0.86, 1.25)        | 1.16 (0.96, 1.40)        | <b>1.20 (1.05, 1.37)</b> | <b>0.0061</b>     |
|                             | HR (95%-CI), Model 2 | 1.00 (Ref.) | 0.99 (0.82, 1.19)        | 1.07 (0.88, 1.29)        | 1.20 (0.99, 1.44)        | <b>1.22 (1.07, 1.40)</b> | <b>0.0025</b>     |
| Lung (C34) in never smokers | Total n/cases        | 26095 / 29  | 81561 / 96               | 75680 / 78               | 75491 / 67               | 258827 / 270             |                   |
|                             | HR (95%-CI), Model 0 | 1.00 (Ref.) | 0.99 (0.66, 1.51)        | 0.94 (0.61, 1.44)        | 0.90 (0.58, 1.41)        | 0.91 (0.65, 1.26)        | 0.5579            |
|                             | HR (95%-CI), Model 1 | 1.00 (Ref.) | 1.00 (0.66, 1.53)        | 0.94 (0.61, 1.47)        | 0.89 (0.56, 1.41)        | 0.89 (0.63, 1.25)        | 0.4969            |
|                             | HR (95%-CI), Model 2 | 1.00 (Ref.) | 1.02 (0.67, 1.56)        | 0.97 (0.62, 1.51)        | 0.92 (0.58, 1.46)        | 0.91 (0.65, 1.29)        | 0.6081            |
| Malignant melanoma (C43)    | Cases                | 108         | 506                      | 499                      | 492                      | 1605                     |                   |
|                             | HR (95%-CI), Model 0 | 1.00 (Ref.) | <b>1.35 (1.10, 1.67)</b> | <b>1.36 (1.10, 1.68)</b> | <b>1.26 (1.02, 1.56)</b> | 1.08 (0.94, 1.24)        | 0.2872            |
|                             | HR (95%-CI), Model 1 | 1.00 (Ref.) | <b>1.24 (1.01, 1.53)</b> | 1.23 (0.99, 1.52)        | 1.17 (0.94, 1.45)        | 1.04 (0.90, 1.20)        | 0.5880            |
|                             | HR (95%-CI), Model 2 | 1.00 (Ref.) | 1.22 (0.99, 1.50)        | 1.20 (0.97, 1.49)        | 1.14 (0.92, 1.41)        | 1.02 (0.89, 1.18)        | 0.7539            |
|                             | HR (95%-CI), Model 3 | 1.00 (Ref.) | 1.21 (0.98, 1.49)        | 1.19 (0.96, 1.47)        | 1.13 (0.91, 1.40)        | 1.02 (0.88, 1.18)        | 0.8077            |
| Breast (C50) †              | Total n/cases        | 32197 / 630 | 96955 / 2156             | 73137 / 1697             | 52620 / 1183             | 254909 / 5666            |                   |
|                             | HR (95%-CI), Model 0 | 1.00 (Ref.) | <b>1.12 (1.02, 1.22)</b> | <b>1.17 (1.07, 1.28)</b> | <b>1.15 (1.04, 1.27)</b> | <b>1.11 (1.04, 1.20)</b> | <b>0.0029</b>     |
|                             | HR (95%-CI), Model 1 | 1.00 (Ref.) | 1.09 (1.00, 1.19)        | <b>1.14 (1.04, 1.25)</b> | <b>1.12 (1.01, 1.24)</b> | <b>1.09 (1.02, 1.18)</b> | <b>0.0174</b>     |
|                             | HR (95%-CI), Model 2 | 1.00 (Ref.) | 1.06 (0.97, 1.16)        | <b>1.11 (1.01, 1.21)</b> | 1.07 (0.97, 1.19)        | 1.06 (0.98, 1.14)        | 0.1346            |
| Endometrium (C54) †         | Total n/cases        | 32197 / 85  | 96955 / 339              | 73137 / 262              | 52620 / 180              | 254909 / 866             |                   |
|                             | HR (95%-CI), Model 0 | 1.00 (Ref.) | <b>1.29 (1.02, 1.64)</b> | <b>1.35 (1.06, 1.73)</b> | <b>1.34 (1.03, 1.73)</b> | <b>1.22 (1.01, 1.47)</b> | <b>0.0349</b>     |
|                             | HR (95%-CI), Model 1 | 1.00 (Ref.) | <b>1.40 (1.10, 1.79)</b> | <b>1.48 (1.15, 1.90)</b> | <b>1.45 (1.11, 1.89)</b> | <b>1.28 (1.06, 1.54)</b> | <b>0.0101</b>     |
|                             | HR (95%-CI), Model 2 | 1.00 (Ref.) | 1.27 (1.00, 1.62)        | 1.27 (0.99, 1.64)        | 1.19 (0.91, 1.55)        | 1.09 (0.90, 1.31)        | 0.3835            |
| Ovary (C56) †               | Total n/cases        | 32197 / 73  | 96955 / 232              | 73137 / 159              | 52620 / 112              | 254909 / 576             |                   |
|                             | HR (95%-CI), Model 0 | 1.00 (Ref.) | 1.02 (0.79, 1.33)        | 0.94 (0.71, 1.24)        | 0.94 (0.70, 1.26)        | 0.92 (0.74, 1.15)        | 0.4720            |
|                             | HR (95%-CI), Model 1 | 1.00 (Ref.) | 1.06 (0.81, 1.38)        | 0.99 (0.75, 1.32)        | 0.99 (0.73, 1.34)        | 0.97 (0.77, 1.21)        | 0.7638            |
|                             | HR (95%-CI), Model 2 | 1.00 (Ref.) | 1.06 (0.81, 1.38)        | 0.99 (0.74, 1.31)        | 0.98 (0.73, 1.33)        | 0.96 (0.77, 1.21)        | 0.7421            |
| Prostate (C61) ‡            | Total n/cases        | 11849 / 276 | 46569 / 1374             | 64946 / 1868             | 94608 / 2424             | 217972 / 5942            |                   |
|                             | HR (95%-CI), Model 0 | 1.00 (Ref.) | 1.11 (0.98, 1.27)        | 1.11 (0.98, 1.27)        | 1.06 (0.94, 1.21)        | 0.99 (0.92, 1.06)        | 0.7157            |
|                             | HR (95%-CI), Model 1 | 1.00 (Ref.) | 1.08 (0.94, 1.23)        | 1.09 (0.95, 1.24)        | 1.05 (0.93, 1.20)        | 1.00 (0.93, 1.08)        | 0.9868            |
|                             | HR (95%-CI), Model 2 | 1.00 (Ref.) | 1.09 (0.95, 1.24)        | 1.10 (0.97, 1.25)        | 1.07 (0.94, 1.22)        | 1.01 (0.94, 1.10)        | 0.7137            |
|                             | HR (95%-CI), Model 3 | 1.00 (Ref.) | 1.08 (0.95, 1.24)        | 1.10 (0.97, 1.25)        | 1.07 (0.94, 1.22)        | 1.01 (0.94, 1.09)        | 0.7415            |
| Kidney (C64-65)             | Cases                | 56          | 226                      | 220                      | 282                      | 784                      |                   |
|                             | HR (95%-CI), Model 0 | 1.00 (Ref.) | 1.09 (0.81, 1.46)        | 1.00 (0.74, 1.34)        | 1.11 (0.83, 1.49)        | 1.07 (0.87, 1.31)        | 0.5196            |
|                             | HR (95%-CI), Model 1 | 1.00 (Ref.) | 1.07 (0.80, 1.44)        | 0.98 (0.72, 1.32)        | 1.07 (0.80, 1.45)        | 1.04 (0.84, 1.28)        | 0.7367            |
|                             | HR (95%-CI), Model 2 | 1.00 (Ref.) | 1.00 (0.75, 1.35)        | 0.89 (0.66, 1.21)        | 0.96 (0.71, 1.30)        | 0.96 (0.78, 1.18)        | 0.6779            |
| Bladder (C67)               | Cases                | 29          | 162                      | 207                      | 234                      | 632                      |                   |
|                             | HR (95%-CI), Model 0 | 1.00 (Ref.) | 1.40 (0.94, 2.08)        | 1.53 (1.03, 2.26)        | 1.42 (0.96, 2.10)        | 1.15 (0.92, 1.45)        | 0.2258            |
|                             | HR (95%-CI), Model 1 | 1.00 (Ref.) | 1.32 (0.88, 1.96)        | 1.38 (0.93, 2.05)        | 1.21 (0.81, 1.80)        | 1.00 (0.79, 1.27)        | 0.9828            |
|                             | HR (95%-CI), Model 2 | 1.00 (Ref.) | 1.29 (0.86, 1.92)        | 1.34 (0.90, 1.99)        | 1.16 (0.78, 1.73)        | 0.97 (0.77, 1.24)        | 0.8295            |
| Lymphatic and hematopoietic | Cases                | 197         | 712                      | 794                      | 772                      | 2475                     |                   |

|                               |                      |             |                   |                   |                   |                   |        |
|-------------------------------|----------------------|-------------|-------------------|-------------------|-------------------|-------------------|--------|
| tissues (C81-96)              | HR (95%-CI), Model 0 | 1.00 (Ref.) | 1.01 (0.86, 1.18) | 1.11 (0.95, 1.30) | 0.98 (0.84, 1.15) | 0.99 (0.88, 1.10) | 0.7964 |
|                               | HR (95%-CI), Model 1 | 1.00 (Ref.) | 1.01 (0.86, 1.18) | 1.11 (0.95, 1.31) | 0.98 (0.84, 1.16) | 0.98 (0.88, 1.10) | 0.7854 |
|                               | HR (95%-CI), Model 2 | 1.00 (Ref.) | 1.01 (0.86, 1.18) | 1.11 (0.94, 1.30) | 0.98 (0.83, 1.15) | 0.98 (0.87, 1.10) | 0.7475 |
|                               | Cases                | 92          | 338               | 385               | 374               | 1189              |        |
| Non-Hodgkin lymphoma (C82-85) | HR (95%-CI), Model 0 | 1.00 (Ref.) | 1.03 (0.82, 1.30) | 1.18 (0.94, 1.49) | 1.06 (0.84, 1.34) | 1.06 (0.90, 1.24) | 0.5086 |
|                               | HR (95%-CI), Model 1 | 1.00 (Ref.) | 1.04 (0.83, 1.32) | 1.20 (0.95, 1.51) | 1.07 (0.84, 1.36) | 1.06 (0.89, 1.25) | 0.5137 |
|                               | HR (95%-CI), Model 2 | 1.00 (Ref.) | 1.04 (0.82, 1.31) | 1.19 (0.94, 1.50) | 1.06 (0.84, 1.35) | 1.05 (0.89, 1.24) | 0.5599 |
|                               | Cases                | 92          | 338               | 385               | 374               | 1189              |        |
| Multiple myeloma (C90)        | HR (95%-CI), Model 0 | 1.00 (Ref.) | 1.06 (0.73, 1.55) | 1.13 (0.77, 1.65) | 1.05 (0.72, 1.54) | 1.03 (0.78, 1.34) | 0.8536 |
|                               | HR (95%-CI), Model 1 | 1.00 (Ref.) | 1.08 (0.74, 1.59) | 1.18 (0.80, 1.74) | 1.11 (0.75, 1.64) | 1.07 (0.81, 1.41) | 0.6224 |
|                               | HR (95%-CI), Model 2 | 1.00 (Ref.) | 1.08 (0.74, 1.59) | 1.18 (0.80, 1.74) | 1.10 (0.74, 1.63) | 1.06 (0.81, 1.40) | 0.6574 |
|                               | Cases                | 34          | 128               | 137               | 138               | 437               |        |
| Leukaemia (C91-C95)           | HR (95%-CI), Model 0 | 1.00 (Ref.) | 0.98 (0.74, 1.31) | 0.99 (0.74, 1.32) | 0.86 (0.64, 1.15) | 0.86 (0.70, 1.06) | 0.1677 |
|                               | HR (95%-CI), Model 1 | 1.00 (Ref.) | 0.94 (0.70, 1.25) | 0.94 (0.70, 1.26) | 0.80 (0.59, 1.08) | 0.82 (0.66, 1.02) | 0.0692 |
|                               | HR (95%-CI), Model 2 | 1.00 (Ref.) | 0.94 (0.70, 1.26) | 0.94 (0.70, 1.26) | 0.80 (0.59, 1.08) | 0.82 (0.67, 1.02) | 0.0756 |
|                               | Cases                | 59          | 214               | 227               | 221               | 721               |        |

Bold where  $p < 0.05$ . CI, Confidence interval; HR, Hazard ratio; LR, likelihood ratio test.

Model 0: Stratified for sex, age group and region and adjusted for age (underlying time variable), ethnicity (4 groups where possible: White, Asian or Asian British, Black or Black British, Mixed race or other, unknown).

Model 1: Model 0 + deprivation (Townsend index quintiles, unknown), qualification (college or university degree/vocational qualification, national examination at ages 17-18, national examination at age 16, other/unknown), employment (in paid employment, receiving pension, not in paid employment, unknown), living with a spouse or partner (yes, no, unknown), height (sex-specific quintiles, unknown), smoking (never, former, current <15 cigarettes/day, current  $\geq 15$  cigarettes/day, current unknown amount of cigarettes/day, unknown), physical activity (<10 excess metabolic equivalents, 10-<50 excess metabolic equivalents,  $\geq 50$  excess metabolic equivalents, unknown), alcohol intake (none, <1 g/day, 1-<10 g/day, 10-<20 g/day,  $\geq 20$  g/day, unknown), total fruit and vegetable intake (< 3 servings/day, 3-< 4 servings/day, 4-< 6 servings/day,  $\geq 6$  servings/day, unknown), estimated cereal fibre intake (sex-specific quintiles, unknown), in women: menopausal status (pre-, postmenopausal, unknown), parity (nulliparous, 1-2,  $\geq 3$ , unknown), hormone-replacement therapy use (never, past, current, unknown) and oral contraceptive pill use (never, past, current, unknown).

Model 2: Model 1 + body mass index (sex-specific quintiles, unknown).

Model 3: For malignant melanoma: Model 2 + skin colour (very fair, fair, light olive, dark olive, brown/black, unknown), hair colour (blonde, red, light brown, dark brown, black, other/unknown), skin reaction (get very tanned, moderately tanning, mildly/occasionally tanning, never tanning only burning, unknown), UV protection use (never/rarely, sometimes, most of the time, always, do not go out in the sunshine, unknown), sunburns before age 15 (never, ever, unknown), solarium use (never, >0-2 times/year,  $\geq 3$  times/year, unknown); for prostate cancer: Model 2 + enlarged prostate (yes, no, unknown).

\* In 22 cases of colorectal cancer (C18/20) colon (C18) and rectal cancer (C19-20) diagnoses coincided.

† Analyses restricted to women.

‡ Analyses restricted to men.

**S8 Table. Hazard ratios and 95% confidence intervals of cancer incidence by site according to poultry intake in UK Biobank**

| Site (ICD-10)               | Model                | Poultry intake (times/week), (mean g/day) |                          |                          |                          | P <sub>trend</sub> |
|-----------------------------|----------------------|-------------------------------------------|--------------------------|--------------------------|--------------------------|--------------------|
|                             |                      | <1 (12.2)                                 | 1-<2 (27.4)              | ≥2 (39.4)                | per 30 g higher intake   |                    |
| Oral (C00-C14)              | Total n              | 75015                                     | 169479                   | 228554                   | 473048                   |                    |
|                             | Cases                | 103                                       | 193                      | 262                      | 558                      |                    |
|                             | HR (95%-CI), Model 0 | 1.00 (Ref.)                               | 0.79 (0.63, 1.01)        | 0.84 (0.67, 1.05)        | 0.85 (0.66, 1.10)        | 0.2263             |
|                             | HR (95%-CI), Model 1 | 1.00 (Ref.)                               | 0.86 (0.67, 1.09)        | 0.96 (0.76, 1.21)        | 0.99 (0.77, 1.28)        | 0.9419             |
| Oesophagus (C15)            | HR (95%-CI), Model 2 | 1.00 (Ref.)                               | 0.87 (0.68, 1.11)        | 0.98 (0.78, 1.24)        | 1.02 (0.79, 1.32)        | 0.8955             |
|                             | Cases                | 79                                        | 221                      | 233                      | 533                      |                    |
|                             | HR (95%-CI), Model 0 | 1.00 (Ref.)                               | 1.16 (0.89, 1.50)        | 1.06 (0.82, 1.37)        | 1.02 (0.78, 1.33)        | 0.8765             |
|                             | HR (95%-CI), Model 1 | 1.00 (Ref.)                               | 1.25 (0.96, 1.62)        | 1.19 (0.92, 1.54)        | 1.15 (0.88, 1.51)        | 0.3008             |
| Stomach (C16)               | HR (95%-CI), Model 2 | 1.00 (Ref.)                               | 1.23 (0.95, 1.60)        | 1.16 (0.89, 1.50)        | 1.12 (0.86, 1.47)        | 0.4092             |
|                             | Cases                | 60                                        | 130                      | 166                      | 356                      |                    |
|                             | HR (95%-CI), Model 0 | 1.00 (Ref.)                               | 0.89 (0.65, 1.21)        | 0.98 (0.73, 1.32)        | 1.02 (0.73, 1.41)        | 0.9138             |
|                             | HR (95%-CI), Model 1 | 1.00 (Ref.)                               | 0.95 (0.69, 1.29)        | 1.07 (0.79, 1.45)        | 1.11 (0.80, 1.55)        | 0.5180             |
| Colorectum (C18-20)*        | HR (95%-CI), Model 2 | 1.00 (Ref.)                               | 0.94 (0.69, 1.27)        | 1.05 (0.78, 1.42)        | 1.09 (0.78, 1.52)        | 0.6074             |
|                             | Cases                | 485                                       | 1274                     | 1467                     | 3226                     |                    |
|                             | HR (95%-CI), Model 0 | 1.00 (Ref.)                               | 1.11 (1.00, 1.23)        | 1.07 (0.96, 1.18)        | 1.05 (0.94, 1.17)        | 0.3923             |
|                             | HR (95%-CI), Model 1 | 1.00 (Ref.)                               | 1.09 (0.98, 1.21)        | 1.05 (0.95, 1.16)        | 1.03 (0.92, 1.15)        | 0.5858             |
| Colon (C18)                 | HR (95%-CI), Model 2 | 1.00 (Ref.)                               | 1.08 (0.97, 1.20)        | 1.03 (0.93, 1.15)        | 1.01 (0.91, 1.13)        | 0.8256             |
|                             | Cases                | 328                                       | 829                      | 976                      | 2133                     |                    |
|                             | HR (95%-CI), Model 0 | 1.00 (Ref.)                               | 1.06 (0.93, 1.21)        | 1.05 (0.92, 1.19)        | 1.04 (0.91, 1.19)        | 0.5686             |
|                             | HR (95%-CI), Model 1 | 1.00 (Ref.)                               | 1.04 (0.92, 1.19)        | 1.03 (0.91, 1.17)        | 1.02 (0.89, 1.17)        | 0.7603             |
| Rectum (C19-20)             | HR (95%-CI), Model 2 | 1.00 (Ref.)                               | 1.03 (0.90, 1.17)        | 1.00 (0.88, 1.14)        | 0.99 (0.87, 1.14)        | 0.9238             |
|                             | Cases                | 162                                       | 455                      | 498                      | 1115                     |                    |
|                             | HR (95%-CI), Model 0 | 1.00 (Ref.)                               | 1.19 (0.99, 1.42)        | 1.09 (0.91, 1.30)        | 1.05 (0.87, 1.26)        | 0.6275             |
|                             | HR (95%-CI), Model 1 | 1.00 (Ref.)                               | 1.17 (0.97, 1.40)        | 1.07 (0.90, 1.29)        | 1.03 (0.86, 1.25)        | 0.7341             |
| Liver (C22)                 | HR (95%-CI), Model 2 | 1.00 (Ref.)                               | 1.17 (0.97, 1.40)        | 1.07 (0.90, 1.29)        | 1.03 (0.86, 1.24)        | 0.7441             |
|                             | Cases                | 55                                        | 109                      | 139                      | 303                      |                    |
|                             | HR (95%-CI), Model 0 | 1.00 (Ref.)                               | 0.83 (0.60, 1.15)        | 0.89 (0.65, 1.22)        | 0.92 (0.65, 1.30)        | 0.6191             |
|                             | HR (95%-CI), Model 1 | 1.00 (Ref.)                               | 0.92 (0.66, 1.28)        | 1.01 (0.74, 1.39)        | 1.04 (0.73, 1.48)        | 0.8204             |
| Pancreas (C25)              | HR (95%-CI), Model 2 | 1.00 (Ref.)                               | 0.91 (0.66, 1.27)        | 0.99 (0.72, 1.36)        | 1.01 (0.71, 1.44)        | 0.9461             |
|                             | Cases                | 105                                       | 244                      | 257                      | 606                      |                    |
|                             | HR (95%-CI), Model 0 | 1.00 (Ref.)                               | 0.98 (0.78, 1.23)        | 0.88 (0.70, 1.11)        | 0.86 (0.67, 1.09)        | 0.2113             |
|                             | HR (95%-CI), Model 1 | 1.00 (Ref.)                               | 1.01 (0.80, 1.28)        | 0.93 (0.74, 1.18)        | 0.91 (0.71, 1.17)        | 0.4727             |
| Lung (C34)                  | HR (95%-CI), Model 2 | 1.00 (Ref.)                               | 1.00 (0.79, 1.26)        | 0.91 (0.72, 1.15)        | 0.89 (0.69, 1.14)        | 0.3503             |
|                             | Cases                | 410                                       | 800                      | 855                      | 2065                     |                    |
|                             | HR (95%-CI), Model 0 | 1.00 (Ref.)                               | <b>0.81 (0.72, 0.92)</b> | <b>0.74 (0.66, 0.83)</b> | <b>0.72 (0.64, 0.82)</b> | <b>&lt;0.0001</b>  |
|                             | HR (95%-CI), Model 1 | 1.00 (Ref.)                               | 0.92 (0.81, 1.03)        | 0.92 (0.82, 1.04)        | 0.93 (0.81, 1.06)        | 0.2536             |
| Lung (C34) in never smokers | HR (95%-CI), Model 2 | 1.00 (Ref.)                               | 0.92 (0.82, 1.04)        | 0.94 (0.83, 1.06)        | 0.94 (0.83, 1.08)        | 0.3940             |
|                             | Total n/cases        | 39774 / 46                                | 91572 / 88               | 127694 / 136             | 259040 / 270             |                    |
|                             | HR (95%-CI), Model 0 | 1.00 (Ref.)                               | 0.80 (0.56, 1.15)        | 1.03 (0.74, 1.45)        | 1.13 (0.78, 1.66)        | 0.5129             |
|                             | HR (95%-CI), Model 1 | 1.00 (Ref.)                               | 0.82 (0.57, 1.17)        | 1.07 (0.76, 1.50)        | 1.18 (0.80, 1.73)        | 0.4021             |
|                             | HR (95%-CI), Model 2 | 1.00 (Ref.)                               | 0.83 (0.58, 1.19)        | 1.09 (0.78, 1.54)        | 1.21 (0.82, 1.78)        | 0.3321             |

|                                              |                      |             |                          |                          |                          |               |
|----------------------------------------------|----------------------|-------------|--------------------------|--------------------------|--------------------------|---------------|
| Malignant melanoma (C43)                     | Cases                | 229         | 594                      | 785                      | 1608                     |               |
|                                              | HR (95%-CI), Model 0 | 1.00 (Ref.) | 1.12 (0.96, 1.30)        | <b>1.19 (1.02, 1.38)</b> | <b>1.20 (1.03, 1.40)</b> | <b>0.0209</b> |
|                                              | HR (95%-CI), Model 1 | 1.00 (Ref.) | 1.04 (0.89, 1.22)        | 1.10 (0.95, 1.28)        | 1.12 (0.96, 1.31)        | 0.1588        |
|                                              | HR (95%-CI), Model 2 | 1.00 (Ref.) | 1.03 (0.89, 1.20)        | 1.09 (0.93, 1.26)        | 1.10 (0.94, 1.29)        | 0.2281        |
|                                              | HR (95%-CI), Model 3 | 1.00 (Ref.) | 1.02 (0.88, 1.19)        | 1.06 (0.91, 1.24)        | 1.08 (0.92, 1.26)        | 0.3657        |
| Breast (C50) †                               | Total n/cases        | 41883 / 900 | 88925 / 2031             | 124256 / 2745            | 255064 / 5676            |               |
|                                              | HR (95%-CI), Model 0 | 1.00 (Ref.) | 1.04 (0.96, 1.12)        | 1.04 (0.96, 1.12)        | 1.03 (0.95, 1.12)        | 0.4225        |
|                                              | HR (95%-CI), Model 1 | 1.00 (Ref.) | 1.04 (0.96, 1.12)        | 1.05 (0.97, 1.13)        | 1.05 (0.97, 1.14)        | 0.2410        |
|                                              | HR (95%-CI), Model 2 | 1.00 (Ref.) | 1.02 (0.94, 1.10)        | 1.02 (0.94, 1.10)        | 1.02 (0.94, 1.10)        | 0.7059        |
| Endometrium (C54) †                          | Total n/cases        | 41883 / 144 | 88925 / 296              | 124256 / 428             | 255064 / 868             |               |
|                                              | HR (95%-CI), Model 0 | 1.00 (Ref.) | 0.93 (0.76, 1.13)        | 1.04 (0.86, 1.25)        | 1.08 (0.88, 1.33)        | 0.4777        |
|                                              | HR (95%-CI), Model 1 | 1.00 (Ref.) | 1.00 (0.82, 1.22)        | 1.15 (0.95, 1.40)        | 1.21 (0.98, 1.49)        | 0.0770        |
|                                              | HR (95%-CI), Model 2 | 1.00 (Ref.) | 0.94 (0.77, 1.15)        | 1.02 (0.84, 1.23)        | 1.05 (0.85, 1.29)        | 0.6682        |
| Ovary (C56) †                                | Total n/cases        | 41883 / 97  | 88925 / 201              | 124256 / 281             | 255064 / 579             |               |
|                                              | HR (95%-CI), Model 0 | 1.00 (Ref.) | 0.93 (0.73, 1.19)        | 1.00 (0.79, 1.26)        | 1.02 (0.79, 1.31)        | 0.8865        |
|                                              | HR (95%-CI), Model 1 | 1.00 (Ref.) | 0.98 (0.77, 1.25)        | 1.06 (0.84, 1.34)        | 1.08 (0.84, 1.40)        | 0.5369        |
|                                              | HR (95%-CI), Model 2 | 1.00 (Ref.) | 0.98 (0.77, 1.25)        | 1.05 (0.83, 1.33)        | 1.08 (0.84, 1.39)        | 0.5587        |
| Prostate (C61) ‡                             | Total n/cases        | 33132 / 873 | 80554 / 2440             | 104298 / 2633            | 217984 / 5946            |               |
|                                              | HR (95%-CI), Model 0 | 1.00 (Ref.) | <b>1.14 (1.05, 1.23)</b> | <b>1.12 (1.04, 1.21)</b> | <b>1.10 (1.02, 1.19)</b> | <b>0.0179</b> |
|                                              | HR (95%-CI), Model 1 | 1.00 (Ref.) | <b>1.11 (1.03, 1.20)</b> | 1.08 (1.00, 1.16)        | 1.06 (0.98, 1.15)        | 0.1739        |
|                                              | HR (95%-CI), Model 2 | 1.00 (Ref.) | <b>1.11 (1.03, 1.20)</b> | <b>1.09 (1.00, 1.17)</b> | 1.07 (0.98, 1.16)        | 0.1152        |
|                                              | HR (95%-CI), Model 3 | 1.00 (Ref.) | <b>1.11 (1.03, 1.20)</b> | <b>1.08 (1.00, 1.17)</b> | 1.07 (0.98, 1.16)        | 0.1262        |
| Kidney (C64-65)                              | Cases                | 135         | 287                      | 361                      | 783                      |               |
|                                              | HR (95%-CI), Model 0 | 1.00 (Ref.) | 0.89 (0.72, 1.09)        | 0.94 (0.77, 1.15)        | 0.97 (0.78, 1.20)        | 0.7547        |
|                                              | HR (95%-CI), Model 1 | 1.00 (Ref.) | 0.90 (0.74, 1.11)        | 0.98 (0.80, 1.20)        | 1.01 (0.81, 1.26)        | 0.9159        |
|                                              | HR (95%-CI), Model 2 | 1.00 (Ref.) | 0.88 (0.71, 1.08)        | 0.93 (0.76, 1.13)        | 0.95 (0.76, 1.18)        | 0.6334        |
| Bladder (C67)                                | Cases                | 119         | 230                      | 283                      | 632                      |               |
|                                              | HR (95%-CI), Model 0 | 1.00 (Ref.) | 0.80 (0.64, 0.99)        | 0.88 (0.71, 1.09)        | 0.91 (0.71, 1.16)        | 0.4305        |
|                                              | HR (95%-CI), Model 1 | 1.00 (Ref.) | 0.82 (0.65, 1.02)        | 0.94 (0.75, 1.16)        | 0.98 (0.76, 1.25)        | 0.8429        |
|                                              | HR (95%-CI), Model 2 | 1.00 (Ref.) | 0.81 (0.65, 1.02)        | 0.92 (0.74, 1.14)        | 0.95 (0.75, 1.22)        | 0.7123        |
| Lymphatic and hematopoietic tissues (C81-96) | Cases                | 355         | 970                      | 1149                     | 2474                     |               |
|                                              | HR (95%-CI), Model 0 | 1.00 (Ref.) | <b>1.16 (1.02, 1.31)</b> | <b>1.15 (1.02, 1.30)</b> | <b>1.13 (1.00, 1.29)</b> | <b>0.0469</b> |
|                                              | HR (95%-CI), Model 1 | 1.00 (Ref.) | <b>1.18 (1.04, 1.33)</b> | <b>1.18 (1.05, 1.33)</b> | <b>1.17 (1.03, 1.32)</b> | <b>0.0175</b> |
|                                              | HR (95%-CI), Model 2 | 1.00 (Ref.) | <b>1.18 (1.04, 1.33)</b> | <b>1.18 (1.04, 1.33)</b> | <b>1.16 (1.03, 1.32)</b> | <b>0.0188</b> |
| Non-Hodgkin lymphoma (C82-85)                | Cases                | 169         | 465                      | 553                      | 1187                     |               |
|                                              | HR (95%-CI), Model 0 | 1.00 (Ref.) | 1.17 (0.98, 1.39)        | 1.16 (0.98, 1.38)        | 1.14 (0.95, 1.37)        | 0.1496        |
|                                              | HR (95%-CI), Model 1 | 1.00 (Ref.) | 1.19 (1.00, 1.42)        | <b>1.19 (1.00, 1.42)</b> | 1.18 (0.98, 1.41)        | 0.0797        |
|                                              | HR (95%-CI), Model 2 | 1.00 (Ref.) | 1.19 (0.99, 1.42)        | 1.19 (1.00, 1.42)        | 1.17 (0.98, 1.41)        | 0.0905        |
| Multiple myeloma (C90)                       | Cases                | 62          | 177                      | 197                      | 436                      |               |
|                                              | HR (95%-CI), Model 0 | 1.00 (Ref.) | 1.21 (0.91, 1.62)        | 1.14 (0.85, 1.51)        | 1.09 (0.81, 1.47)        | 0.5534        |
|                                              | HR (95%-CI), Model 1 | 1.00 (Ref.) | 1.23 (0.92, 1.65)        | 1.14 (0.86, 1.53)        | 1.09 (0.81, 1.47)        | 0.5555        |
|                                              | HR (95%-CI), Model 2 | 1.00 (Ref.) | 1.23 (0.92, 1.65)        | 1.14 (0.85, 1.52)        | 1.09 (0.81, 1.47)        | 0.5696        |
| Leukaemia (C91-C95)                          | Cases                | 109         | 288                      | 326                      | 723                      |               |

|                      |             |                   |                   |                   |        |
|----------------------|-------------|-------------------|-------------------|-------------------|--------|
| HR (95%-CI), Model 0 | 1.00 (Ref.) | 1.11 (0.89, 1.38) | 1.07 (0.86, 1.33) | 1.05 (0.83, 1.32) | 0.6802 |
| HR (95%-CI), Model 1 | 1.00 (Ref.) | 1.12 (0.89, 1.39) | 1.09 (0.88, 1.36) | 1.08 (0.85, 1.36) | 0.5293 |
| HR (95%-CI), Model 2 | 1.00 (Ref.) | 1.12 (0.89, 1.40) | 1.10 (0.88, 1.37) | 1.08 (0.86, 1.37) | 0.5059 |

Bold where p < 0.05. CI, Confidence interval; HR, Hazard ratio; LR, likelihood ratio test.

Model 0: Stratified for sex, age group and region and adjusted for age (underlying time variable), ethnicity (4 groups where possible: White, Asian or Asian British, Black or Black British, Mixed race or other, unknown).

Model 1: Model 0 + deprivation (Townsend index quintiles, unknown), qualification (college or university degree/vocational qualification, national examination at ages 17-18, national examination at age 16, other/unknown), employment (in paid employment, receiving pension, not in paid employment, unknown), living with a spouse or partner (yes, no, unknown), height (sex-specific quintiles, unknown), smoking (never, former, current <15 cigarettes/day, current ≥15 cigarettes/day, current unknown amount of cigarettes/day, unknown), physical activity (<10 excess metabolic equivalents, 10-<50 excess metabolic equivalents, ≥50 excess metabolic equivalents, unknown), alcohol intake (none, <1 g/day, 1-<10 g/day, 10-<20 g/day, ≥20 g/day, unknown), total fruit and vegetable intake (< 3 servings/day, 3-< 4 servings/day, 4-< 6 servings/day, ≥ 6 servings/day, unknown), estimated cereal fibre intake (sex-specific quintiles, unknown), in women: menopausal status (pre-, postmenopausal, unknown), parity (nulliparous, 1-2, ≥3, unknown), hormone-replacement therapy use (never, past, current, unknown) and oral contraceptive pill use (never, past, current, unknown).

Model 2: Model 1 + body mass index (sex-specific quintiles, unknown).

Model 3: For malignant melanoma: Model 2 + skin colour (very fair, fair, light olive, dark olive, brown/black, unknown), hair colour (blonde, red, light brown, dark brown, black, other/unknown), skin reaction (get very tanned, moderately tanning, mildly/occasionally tanning, never tanning only burning, unknown), UV protection use (never/rarely, sometimes, most of the time, always, do not go out in the sunshine, unknown), sunburns before age 15 (never, ever, unknown), solarium use (never, >0-2 times/year, ≥3 times/year, unknown); for prostate cancer: Model 2 + enlarged prostate (yes, no, unknown).

\* In 22 cases of colorectal cancer (C18/20) colon (C18) and rectal cancer (C19-20) diagnoses coincided.

† Analyses restricted to women.

‡ Analyses restricted to men.



**S9 Table. Multivariable adjusted hazard ratios and 95% confidence intervals of colorectal, colon and rectal cancer incidence by meat type and sex in UK Biobank\***

| Meat type (increment)                       | Women                       |                          |                             | Men                      |                         |               |
|---------------------------------------------|-----------------------------|--------------------------|-----------------------------|--------------------------|-------------------------|---------------|
|                                             | per increment higher intake | P <sub>trend</sub>       | per increment higher intake | P <sub>trend</sub>       | LR test for interaction |               |
| <b>Total meat intake (100 g)</b>            |                             |                          |                             |                          |                         |               |
|                                             | Total n                     | 252268                   |                             | 215152                   |                         |               |
| Colorectum (C18-20)                         | Cases                       | 1342                     |                             | 1852                     |                         |               |
|                                             | HR (95%-CI)                 | 1.15 (0.92, 1.44)        | 0.2087                      | <b>1.46 (1.16, 1.85)</b> | <b>0.0013</b>           | <b>0.0196</b> |
| Colon (C18)                                 | Cases                       | 985                      |                             | 1126                     |                         |               |
|                                             | HR (95%-CI)                 | 1.29 (0.99, 1.67)        | 0.0601                      | 1.31 (0.98, 1.76)        | 0.0707                  | 0.3711        |
| Rectum (C19-20)                             | Cases                       | 369                      |                             | 736                      |                         |               |
|                                             | HR (95%-CI)                 | 0.87 (0.58, 1.30)        | 0.4869                      | <b>1.67 (1.14, 2.43)</b> | <b>0.0077</b>           | <b>0.0059</b> |
| <b>Red and processed meat intake (70 g)</b> |                             |                          |                             |                          |                         |               |
|                                             | Total n                     | 252422                   |                             | 215355                   |                         |               |
| Colorectum (C18-20)                         | Cases                       | 1345                     |                             | 1855                     |                         |               |
|                                             | HR (95%-CI)                 | 1.16 (0.95, 1.42)        | 0.1480                      | <b>1.51 (1.22, 1.86)</b> | <b>0.0001</b>           | <b>0.0073</b> |
| Colon (C18)                                 | Cases                       | 987                      |                             | 1127                     |                         |               |
|                                             | HR (95%-CI)                 | 1.26 (0.99, 1.60)        | 0.0569                      | <b>1.59 (1.21, 2.09)</b> | <b>0.0009</b>           | <b>0.0404</b> |
| Rectum (C19-20)                             | Cases                       | 370                      |                             | 738                      |                         |               |
|                                             | HR (95%-CI)                 | 0.91 (0.63, 1.32)        | 0.6232                      | <b>1.41 (1.01, 1.95)</b> | <b>0.0417</b>           | <b>0.0285</b> |
| <b>Red meat intake (50 g)</b>               |                             |                          |                             |                          |                         |               |
|                                             | Total n                     | 252745                   |                             | 215619                   |                         |               |
| Colorectum (C18-20)                         | Cases                       | 1345                     |                             | 1856                     |                         |               |
|                                             | HR (95%-CI)                 | 1.09 (0.88, 1.34)        | 0.4425                      | <b>1.38 (1.11, 1.70)</b> | <b>0.0031</b>           | <b>0.0160</b> |
| Colon (C18)                                 | Cases                       | 987                      |                             | 1127                     |                         |               |
|                                             | HR (95%-CI)                 | 1.16 (0.91, 1.49)        | 0.2395                      | <b>1.61 (1.22, 2.13)</b> | <b>0.0008</b>           | <b>0.0196</b> |
| Rectum (C19-20)                             | Cases                       | 370                      |                             | 739                      |                         |               |
|                                             | HR (95%-CI)                 | 0.88 (0.60, 1.30)        | 0.5241                      | 1.11 (0.80, 1.53)        | 0.5409                  | 0.1962        |
| <b>Processed meat intake (20 g)</b>         |                             |                          |                             |                          |                         |               |
|                                             | Total n                     | 254909                   |                             | 217972                   |                         |               |
| Colorectum (C18-20)                         | Cases                       | 1356                     |                             | 1872                     |                         |               |
|                                             | HR (95%-CI)                 | 1.10 (0.94, 1.28)        | 0.2295                      | <b>1.26 (1.09, 1.45)</b> | <b>0.0021</b>           | <b>0.0371</b> |
| Colon (C18)                                 | Cases                       | 993                      |                             | 1141                     |                         |               |
|                                             | HR (95%-CI)                 | 1.07 (0.90, 1.28)        | 0.4338                      | <b>1.21 (1.00, 1.45)</b> | <b>0.0477</b>           | 0.1232        |
| Rectum (C19-20)                             | Cases                       | 375                      |                             | 741                      |                         |               |
|                                             | HR (95%-CI)                 | 1.14 (0.85, 1.52)        | 0.3835                      | <b>1.35 (1.07, 1.71)</b> | <b>0.0104</b>           | 0.1480        |
| <b>Poultry intake (30 g)</b>                |                             |                          |                             |                          |                         |               |
|                                             | Total n                     | 255064                   |                             | 217984                   |                         |               |
| Colorectum (C18-20)                         | Cases                       | 1355                     |                             | 1871                     |                         |               |
|                                             | HR (95%-CI)                 | 0.91 (0.77, 1.07)        | 0.2456                      | 1.12 (0.96, 1.30)        | 0.1394                  | <b>0.0216</b> |
| Colon (C18)                                 | Cases                       | 993                      |                             | 1140                     |                         |               |
|                                             | HR (95%-CI)                 | 0.98 (0.80, 1.19)        | 0.8316                      | 1.02 (0.85, 1.23)        | 0.8309                  | 0.4305        |
| Rectum (C19-20)                             | Cases                       | 374                      |                             | 741                      |                         |               |
|                                             | HR (95%-CI)                 | <b>0.73 (0.54, 0.99)</b> | <b>0.0455</b>               | <b>1.27 (1.00, 1.61)</b> | <b>0.0487</b>           | <b>0.0033</b> |

Bold where p < 0.05. CI, Confidence interval; HR, Hazard ratio; LR, likelihood ratio test.

\*Hazard ratios stratified for age group and region and adjusted for age (underlying time variable), ethnicity (4 groups where possible: White, Asian or Asian British, Black or Black British, Mixed race or other, unknown), deprivation (Townsend index quintiles, unknown), qualification (college or university degree/vocational qualification, national examination at ages 17-18, national examination at age 16, other/unknown), employment (in paid employment, receiving pension, not in paid employment, unknown), living with a spouse or partner (yes, no, unknown), height (sex-specific quintiles, unknown), smoking (never, former, current <15 cigarettes/day, current ≥15 cigarettes/day, current unknown amount of cigarettes/day, unknown), physical activity (<10 excess metabolic equivalents, 10-<50 excess metabolic equivalents, ≥50 excess metabolic equivalents, unknown), alcohol intake (none, <1 g/day, 1-<10 g/day, 10-<20 g/day, ≥20 g/day, unknown), total fruit and vegetable intake (<3 servings/day, 3-<4 servings/day, 4-<6 servings/day, ≥6 servings/day, unknown), estimated cereal fibre intake (sex-specific quintiles, unknown), in women: menopausal status (pre-, postmenopausal, unknown), parity (nulliparous, 1-2, ≥3, unknown), hormone-replacement therapy (never, past, current, unknown) and oral contraceptive pill use (never, past, current, unknown), body mass index (sex-specific quintiles, unknown).



**Supplementary figures**

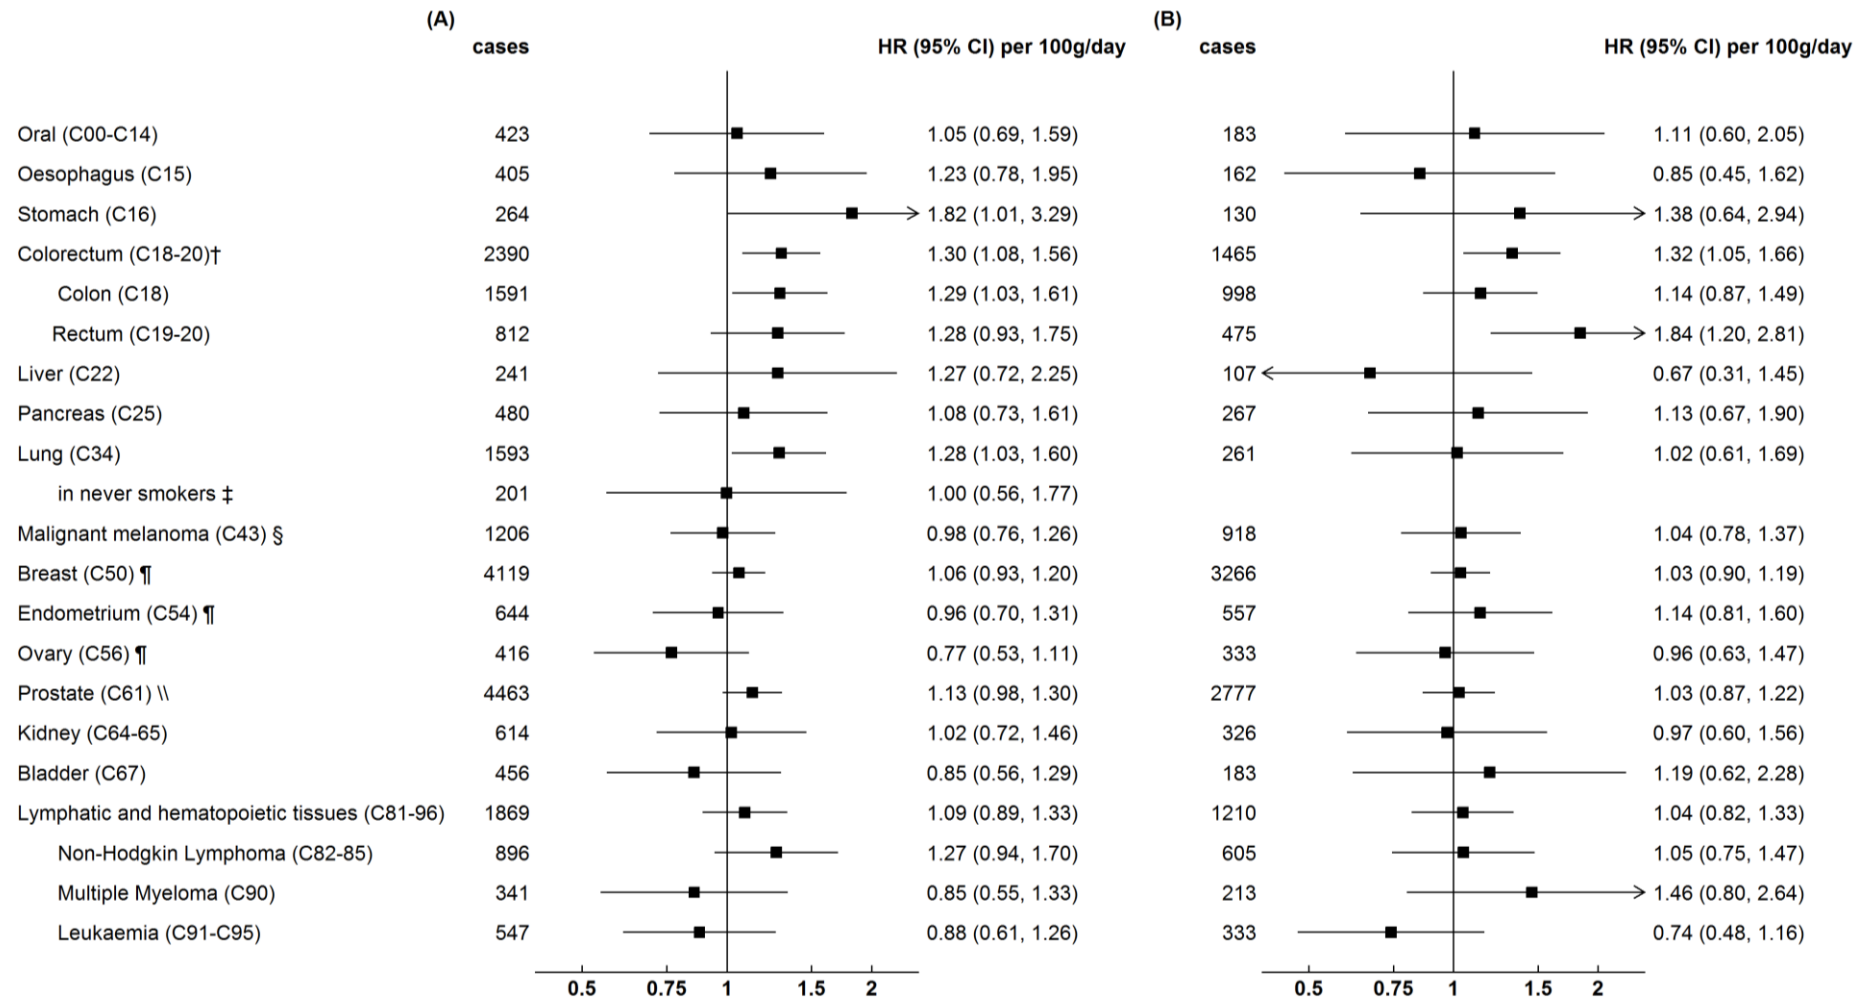

**S1 Fig. Associations of total meat intake and cancer incidence by cancer site (per 100g/day) when excluding first 2 years of follow-up (A, n = 459,363) and including only never smokers (B, n = 256,009)\***

CI, Confidence interval; HR, Hazard ratio.

\* Stratified for sex, age group (<45, 45-<50, 50-<55, 55-<60, 60-<65 and ≥65 years) and region (London, Wales, North-West, North-East, Yorkshire and Humber, West Midlands, East Midlands, South-East, South-West, Scotland) and adjusted for age (underlying time variable), ethnicity (4 groups where possible: White, Asian or Asian British, Black or Black British, Mixed race or other, unknown), deprivation (Townsend index quintiles, unknown), qualification (college or university degree/vocational qualification, national examination at ages 17-18, national examination at age 16, other/unknown), employment (in paid employment, receiving pension, not in paid employment, unknown), living with a spouse or partner (yes, no, unknown), height (sex-specific quintiles, unknown), smoking (never, former, current <15 cigarettes/day, current ≥15 cigarettes/day, current unknown amount of cigarettes/day, unknown), physical activity (<10 excess metabolic equivalents, 10-<50 excess metabolic equivalents, ≥50 excess metabolic equivalents, unknown), alcohol intake (none, <1 g/day, 1-<10 g/day, 10-<20 g/day, ≥20 g/day, unknown), total fruit and vegetable intake (<3 servings/day, 3-<4 servings/day, 4-<6 servings/day, ≥6 servings/day, unknown), estimated cereal fibre intake (sex-specific quintiles, unknown), body mass index (sex-specific quintiles, unknown), in women: menopausal status (pre-, postmenopausal, unknown), parity (nulliparous, 1-2, ≥3, unknown), hormone-replacement therapy (never, past, current, unknown) and oral contraceptive pill use (never, past, current, unknown).

† In 13 (A) and 8 (B) cases of colorectal cancer (C18/20) colon (C18) and rectal cancer (C19-20) diagnoses coincided.

‡ Analyses restricted to never smokers (A: n = 252,436).

§ Additionally adjusted for skin colour (very fair, fair, light olive, dark olive, brown/black, unknown), hair colour (blonde, red, light brown, dark brown, black, other/unknown), skin reaction (get very tanned, moderately tanning, mildly/occasionally tanning, never tanning only burning, unknown), UV protection use (never/rarely, sometimes, most of the time, always, do not go out in the sunshine, unknown), sunburns before age 15 (never, ever, unknown), solarium use (never, >0-2 times/year, ≥3 times/year, unknown).

¶ Analyses restricted to women (A: n = 248,520; B: n = 150,480).

\\ Analyses restricted to men (A: n = 210,843; B: n = 105,529).

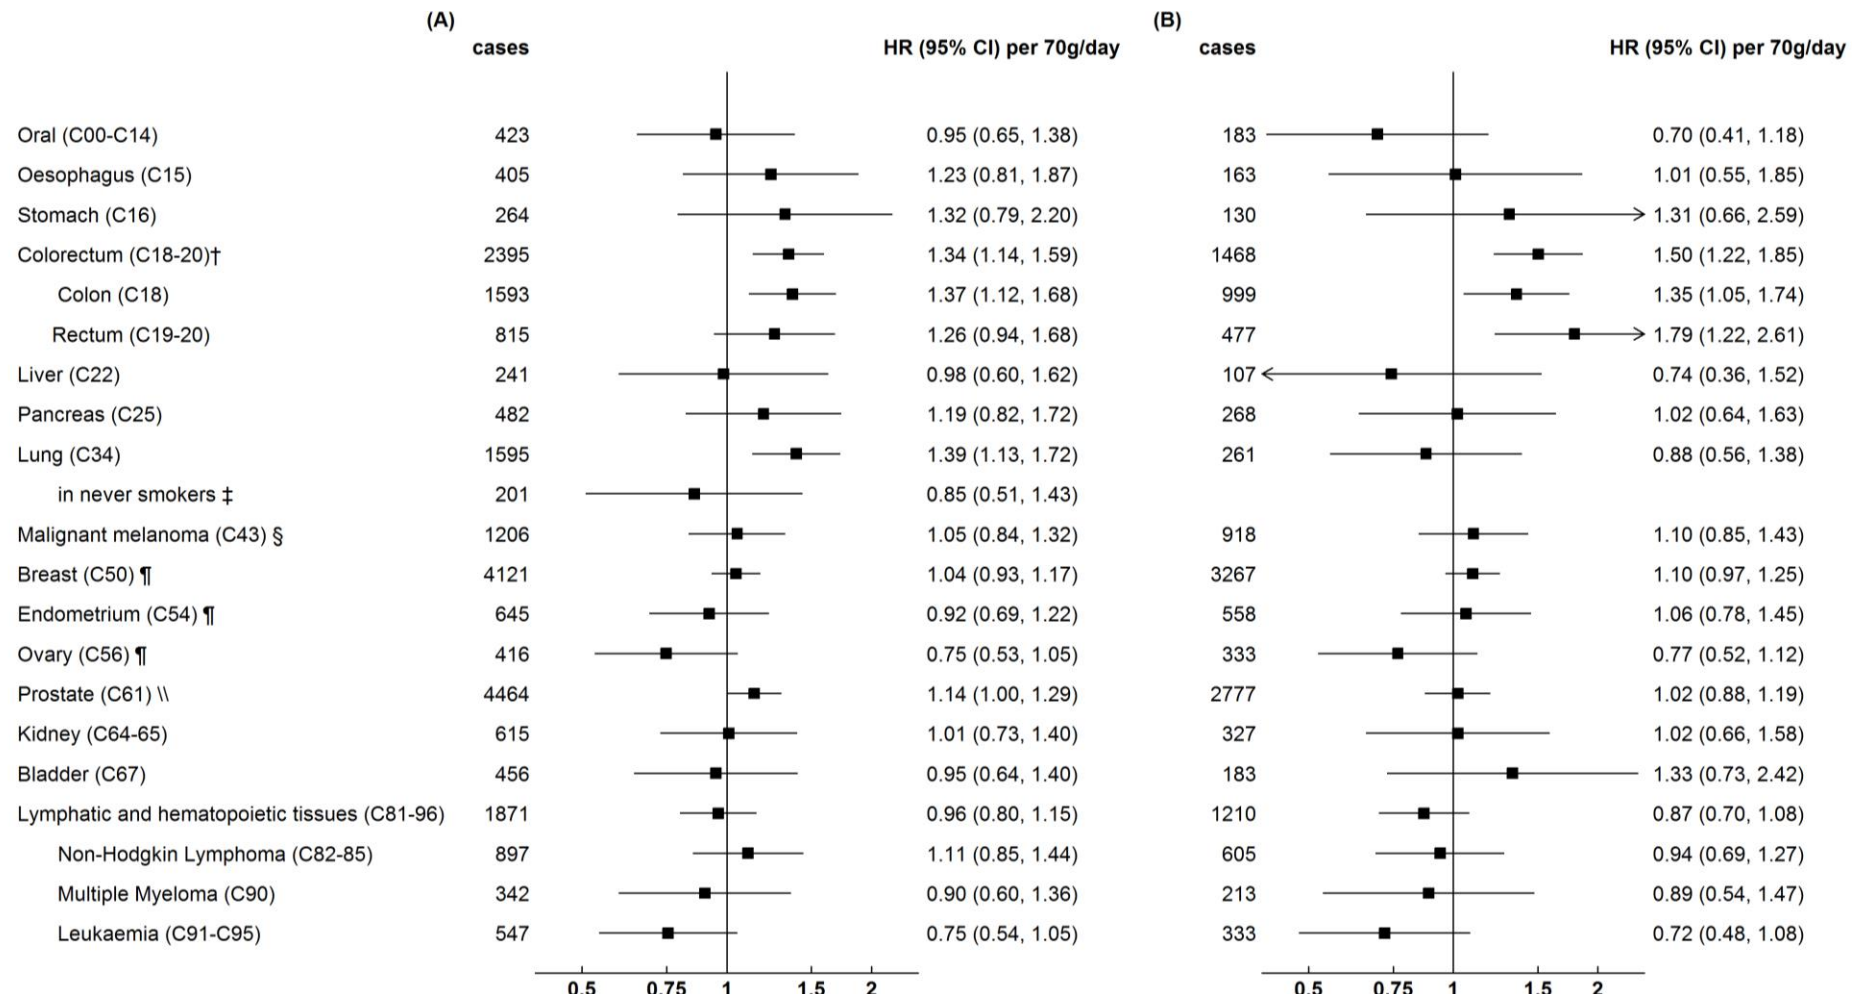

**S2 Fig. Associations of red and processed meat intake and cancer incidence by cancer site (per 70g/day) when excluding first 2 years of follow-up (A, n = 459,713) and including only never smokers (B, n = 256,182)\***

CI, Confidence interval; HR, Hazard ratio.

\* Stratified for sex, age group (<45, 45-<50, 50-<55, 55-<60, 60-<65 and ≥65 years) and region (London, Wales, North-West, North-East, Yorkshire and Humber, West Midlands, East Midlands, South-East, South-West, Scotland) and adjusted for age (underlying time variable), ethnicity (4 groups where possible: White, Asian or Asian British, Black or Black British, Mixed race or other, unknown), deprivation (Townsend index quintiles, unknown), qualification (college or university degree/vocational qualification, national examination at ages 17-18, national examination at age 16, other/unknown), employment (in paid employment, receiving pension, not in paid employment, unknown), living with a spouse or partner (yes, no, unknown), height (sex-specific quintiles, unknown), smoking (never, former, current <15 cigarettes/day, current ≥15 cigarettes/day, current unknown amount of cigarettes/day, unknown), physical activity (<10 excess metabolic equivalents, 10-<50 excess metabolic equivalents, ≥50 excess metabolic

equivalents, unknown), alcohol intake (none, <1 g/day, 1-<10 g/day, 10-<20 g/day, ≥20 g/day, unknown), total fruit and vegetable intake (<3 servings/day, 3-<4 servings/day, 4-<6 servings/day, ≥6 servings/day, unknown), estimated cereal fibre intake (sex-specific quintiles, unknown), body mass index (sex-specific quintiles, unknown), in women: menopausal status (pre-, postmenopausal, unknown), parity (nulliparous, 1-2, ≥3, unknown), hormone-replacement therapy (never, past, current, unknown) and oral contraceptive pill use (never, past, current, unknown).

† In 13 (A) and 8 (B) cases of colorectal cancer (C18/20) colon (C18) and rectal cancer (C19-20) diagnoses coincided.

‡ Analyses restricted to never smokers (A: n = 252,608).

§ Additionally adjusted for skin colour (very fair, fair, light olive, dark olive, brown/black, unknown), hair colour (blonde, red, light brown, dark brown, black, other/unknown), skin reaction (get very tanned, moderately tanning, mildly/occasionally tanning, never tanning only burning, unknown), UV protection use (never/rarely, sometimes, most of the time, always, do not go out in the sunshine, unknown), sunburns before age 15 (never, ever, unknown), solarium use (never, >0-2 times/year, ≥3 times/year, unknown).

¶ Analyses restricted to women (A: n = 248,673; B: n = 150,571).

\\ Analyses restricted to men (A: n = 211,040; B: n = 105,611).

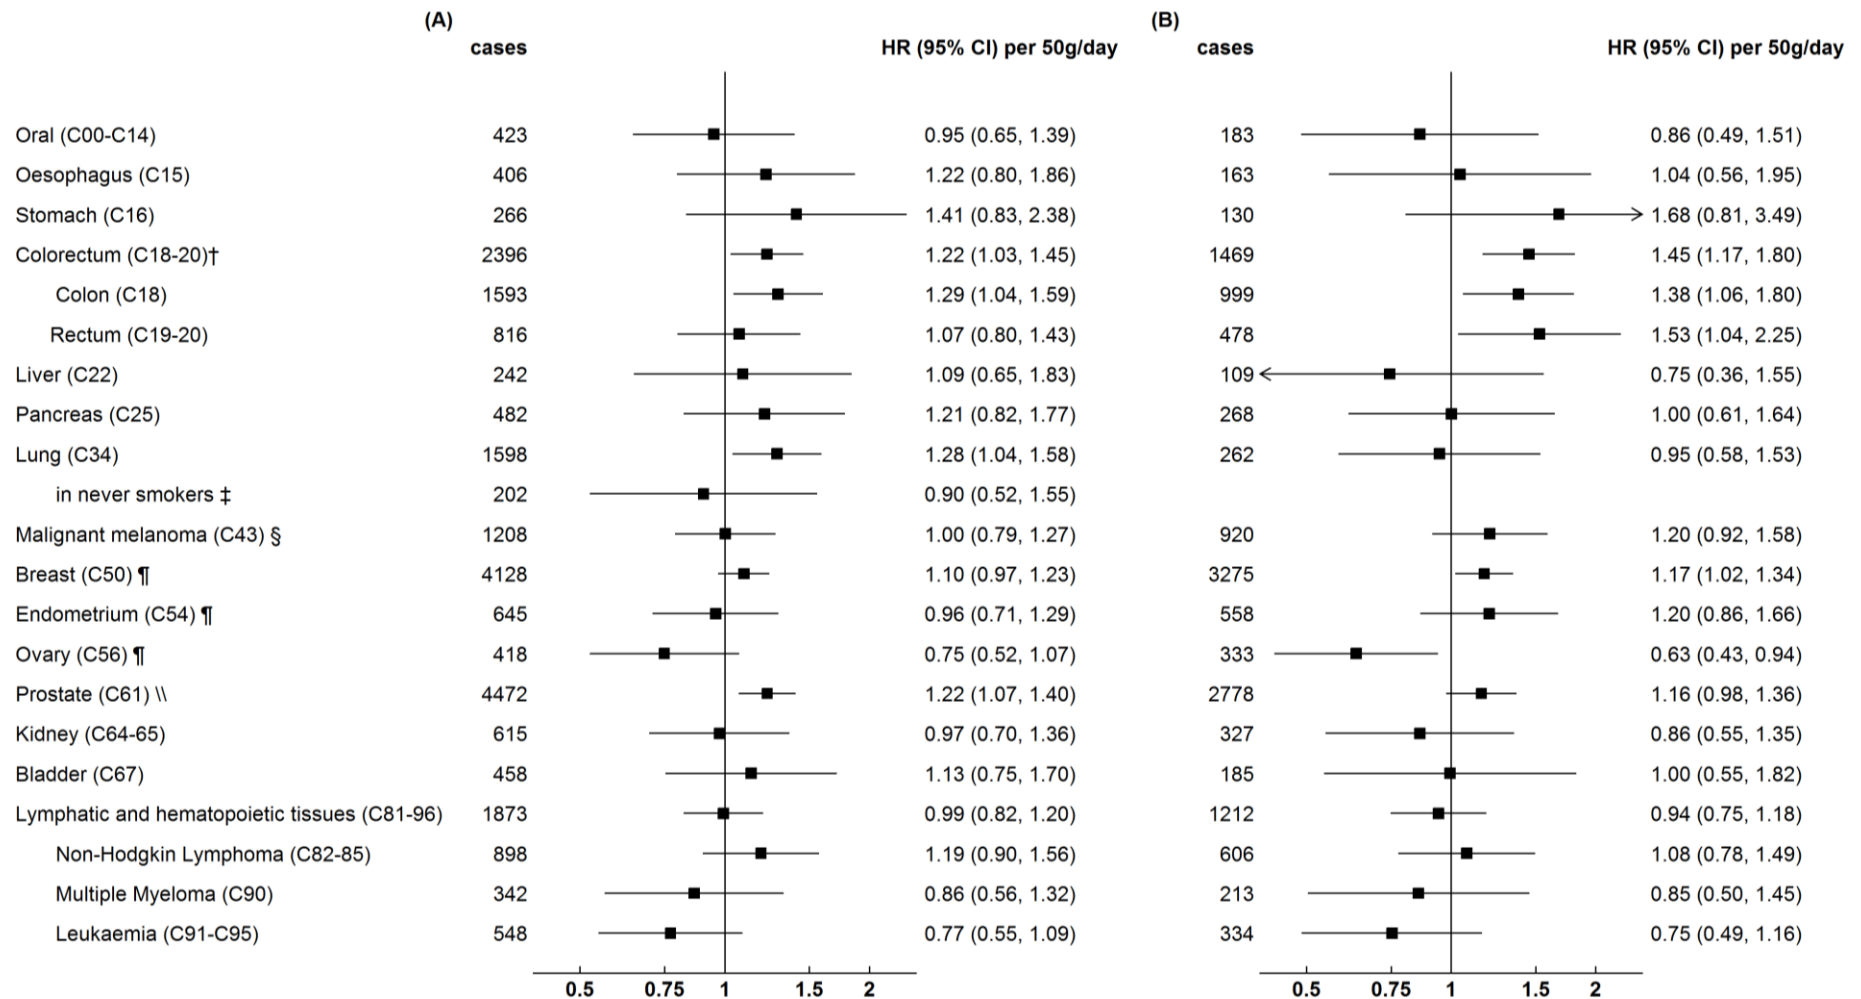

**S3 Fig. Associations of red meat intake and cancer incidence by cancer site (per 50g/day) when excluding first 2 years of follow-up (A, n = 460,288) and including only never smokers (B, n = 256,545)\***

CI, Confidence interval; HR, Hazard ratio.

\* Stratified for sex, age group (<45, 45-<50, 50-<55, 55-<60, 60-<65 and ≥65 years) and region (London, Wales, North-West, North-East, Yorkshire and Humber, West Midlands, East Midlands, South-East, South-West, Scotland) and adjusted for age (underlying time variable), ethnicity (4 groups where possible: White, Asian or Asian British, Black or Black British, Mixed race or other, unknown), deprivation (Townsend index quintiles, unknown), qualification (college or university degree/vocational qualification, national examination at ages 17-18, national examination at age 16, other/unknown), employment (in paid employment, receiving pension, not in paid employment, unknown), living with a spouse or partner (yes, no, unknown), height (sex-specific quintiles, unknown), smoking (never, former, current <15 cigarettes/day, current ≥15 cigarettes/day, current unknown amount of cigarettes/day, unknown), physical activity (<10 excess metabolic equivalents, 10-<50 excess metabolic equivalents, ≥50 excess metabolic

equivalents, unknown), alcohol intake (none, <1 g/day, 1-<10 g/day, 10-<20 g/day, ≥20 g/day, unknown), total fruit and vegetable intake (<3 servings/day, 3-<4 servings/day, 4-<6 servings/day, ≥6 servings/day, unknown), estimated cereal fibre intake (sex-specific quintiles, unknown), body mass index (sex-specific quintiles, unknown), in women: menopausal status (pre-, postmenopausal, unknown), parity (nulliparous, 1-2, ≥3, unknown), hormone-replacement therapy (never, past, current, unknown) and oral contraceptive pill use (never, past, current, unknown).

† In 13 (A) and 8 (B) cases of colorectal cancer (C18/20) colon (C18) and rectal cancer (C19-20) diagnoses coincided.

‡ Analyses restricted to never smokers (A: n = 252,965).

§ Additionally adjusted for skin colour (very fair, fair, light olive, dark olive, brown/black, unknown), hair colour (blonde, red, light brown, dark brown, black, other/unknown), skin reaction (get very tanned, moderately tanning, mildly/occasionally tanning, never tanning only burning, unknown), UV protection use (never/rarely, sometimes, most of the time, always, do not go out in the sunshine, unknown), sunburns before age 15 (never, ever, unknown), solarium use (never, >0-2 times/year, ≥3 times/year, unknown).

¶ Analyses restricted to women (A: n = 248,991; B: n = 150,793).

∥ Analyses restricted to men (A: n = 211,297; B: n = 105,572).



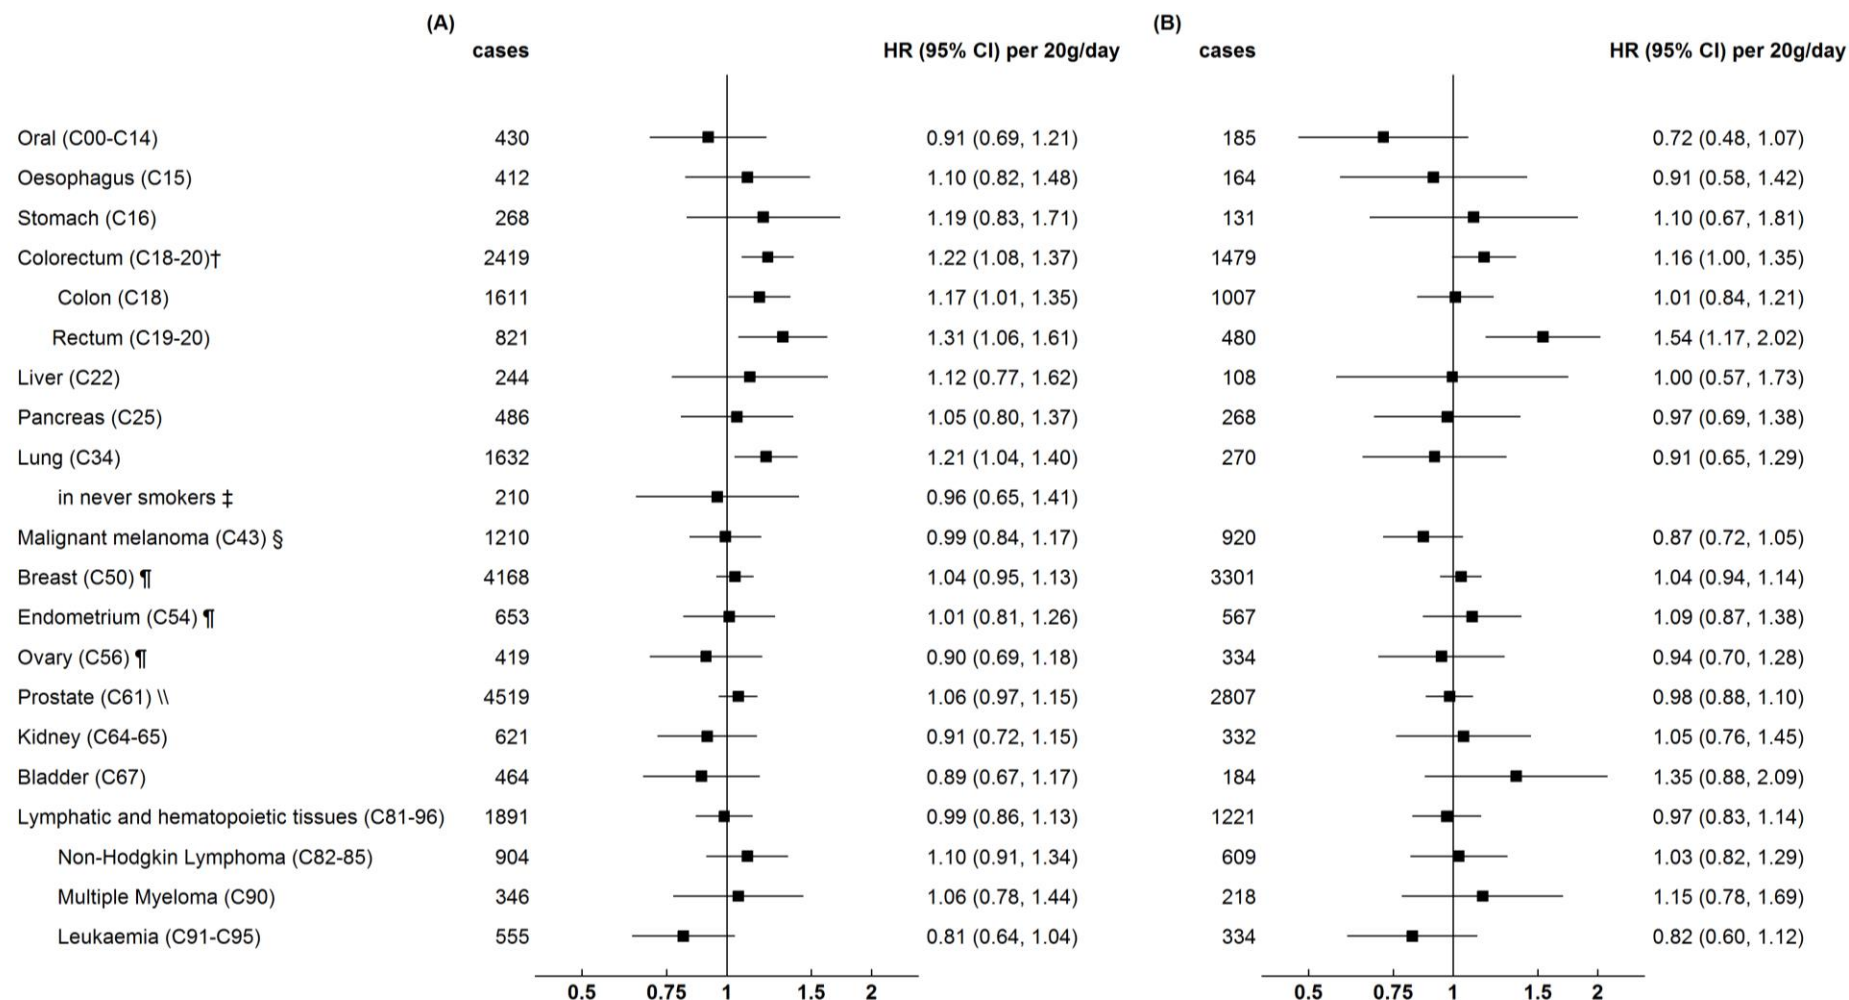

**S4 Fig. Associations of processed meat intake and cancer incidence by cancer site (per 20g/day) when excluding first 2 years of follow-up (A, n = 464,736) and including only never smokers (B, n = 258,827)\***

CI, Confidence interval; HR, Hazard ratio.

\* Stratified for sex, age group (<45, 45-<50, 50-<55, 55-<60, 60-<65 and ≥65 years) and region (London, Wales, North-West, North-East, Yorkshire and Humber, West Midlands, East Midlands, South-East, South-West, Scotland) and adjusted for age (underlying time variable), ethnicity (4 groups where possible: White, Asian or Asian British, Black or Black British, Mixed race or other, unknown), deprivation (Townsend index quintiles, unknown), qualification (college or university degree/vocational qualification, national examination at ages 17-18, national examination at age 16, other/unknown), employment (in paid employment, receiving pension, not in paid employment, unknown), living with a spouse or partner (yes, no, unknown), height (sex-specific quintiles, unknown), smoking (never, former, current <15 cigarettes/day, current ≥15 cigarettes/day, current unknown amount of cigarettes/day, unknown), physical activity (<10 excess metabolic equivalents, 10-<50 excess metabolic equivalents, ≥50 excess metabolic

equivalents, unknown), alcohol intake (none, <1 g/day, 1-<10 g/day, 10-<20 g/day, ≥20 g/day, unknown), total fruit and vegetable intake (<3 servings/day, 3-<4 servings/day, 4-<6 servings/day, ≥6 servings/day, unknown), estimated cereal fibre intake (sex-specific quintiles, unknown), body mass index (sex-specific quintiles, unknown), in women: menopausal status (pre-, postmenopausal, unknown), parity (nulliparous, 1-2, ≥3, unknown), hormone-replacement therapy (never, past, current, unknown) and oral contraceptive pill use (never, past, current, unknown).

† In 13 (A) and 8 (B) cases of colorectal cancer (C18/20) colon (C18) and rectal cancer (C19-20) diagnoses coincided.

‡ Analyses restricted to never smokers (A: n = 255,227).

§ Additionally adjusted for skin colour (very fair, fair, light olive, dark olive, brown/black, unknown), hair colour (blonde, red, light brown, dark brown, black, other/unknown), skin reaction (get very tanned, moderately tanning, mildly/occasionally tanning, never tanning only burning, unknown), UV protection use (never/rarely, sometimes, most of the time, always, do not go out in the sunshine, unknown), sunburns before age 15 (never, ever, unknown), solarium use (never, >0-2 times/year, ≥3 times/year, unknown).

¶ Analyses restricted to women (A: n = 251,120; B: n = 152,058).

∥ Analyses restricted to men (A: n = 213,616; B: n = 106,769).

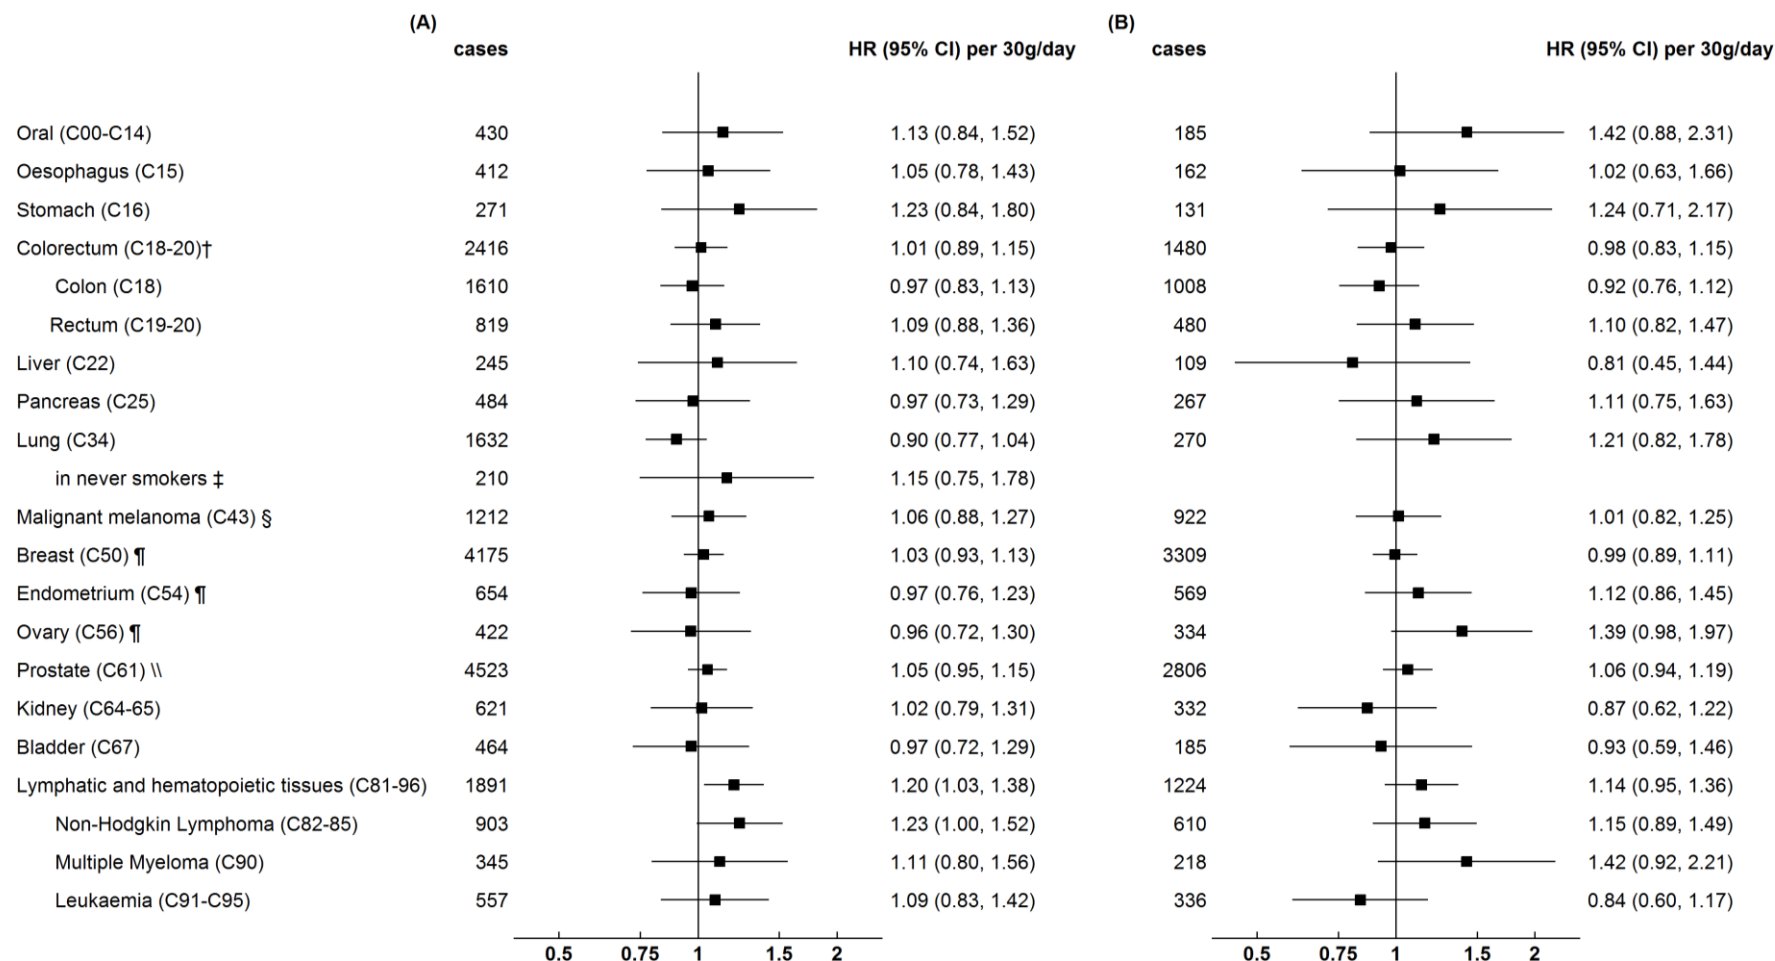

**S5 Fig. Associations of poultry intake and cancer incidence by cancer site (per 30g/day) when excluding first 2 years of follow-up (A, n = 464,897) and including only never smokers (B, n = 259,040)\***

CI, Confidence interval; HR, Hazard ratio.

\* Stratified for sex, age group (<45, 45-<50, 50-<55, 55-<60, 60-<65 and ≥65 years) and region (London, Wales, North-West, North-East, Yorkshire and Humber, West Midlands, East Midlands, South-East, South-West, Scotland) and adjusted for age (underlying time variable), ethnicity (4 groups where possible: White, Asian or Asian British, Black or Black British, Mixed race or other, unknown), deprivation (Townsend index quintiles, unknown), qualification (college or university degree/vocational qualification, national examination at ages 17-18, national examination at age 16, other/unknown), employment (in paid employment, receiving pension, not in paid employment, unknown), living with a spouse or partner (yes, no, unknown), height (sex-specific quintiles, unknown), smoking (never, former, current <15 cigarettes/day, current ≥15 cigarettes/day, current unknown amount of cigarettes/day, unknown), physical activity (<10 excess metabolic equivalents, 10-<50 excess metabolic equivalents, ≥50 excess metabolic equivalents, unknown), alcohol intake (none, <1 g/day, 1-<10 g/day, 10-<20 g/day, ≥20 g/day, unknown), total fruit and vegetable intake (<3 servings/day, 3-<4 servings/day,

4-<6 servings/day, ≥6 servings/day, unknown), estimated cereal fibre intake (sex-specific quintiles, unknown), body mass index (sex-specific quintiles, unknown), in women: menopausal status (pre-, postmenopausal, unknown), parity (nulliparous, 1-2, ≥3, unknown), hormone-replacement therapy (never, past, current, unknown) and oral contraceptive pill use (never, past, current, unknown).

† In 13 (A) and 8 (B) cases of colorectal cancer (C18/20) colon (C18) and rectal cancer (C19-20) diagnoses coincided.

‡ Analyses restricted to never smokers (A: n = 255,431).

§ Additionally adjusted for skin colour (very fair, fair, light olive, dark olive, brown/black, unknown), hair colour (blonde, red, light brown, dark brown, black, other/unknown), skin reaction (get very tanned, moderately tanning, mildly/occasionally tanning, never tanning only burning, unknown), UV protection use (never/rarely, sometimes, most of the time, always, do not go out in the sunshine, unknown), sunburns before age 15 (never, ever, unknown), solarium use (never, >0-2 times/year, ≥3 times/year, unknown).

¶ Analyses restricted to women (A: n = 251,268; B: n = 152,209).

∥ Analyses restricted to men (A: n = 213,629; B: n = 106,831).
